# Supplementary material for: The synthesis and evaluation of near-infrared probes with barbituric acid acceptors forin vivodetection of amyloid plaques
Source: Royal Society of Chemistry journal article supplement (doi:10.1039/c5cc03662c), 2015-01-01
Supplement: c5cc03662c1.pdf [file c5cc03662c1.pdf]

## Electronic Supplementary Information (ESI)

### **Synthesis and evaluation of near-infrared probes with barbituric acid acceptors for in vivo detection of amyloid plaques**

Kaixiang Zhou,<sup>a</sup> Hualong Fu,<sup>a</sup> Liang Feng,<sup>a</sup> Mengchao Cui,<sup>\*a</sup> Jiapei Dai<sup>b</sup> and Boli Liu<sup>a</sup>

<sup>a</sup> Key Laboratory of Radiopharmaceuticals, Ministry of Education, College of Chemistry, Beijing Normal University, Beijing 100875, P. R. China.

<sup>b</sup> Wuhan Institute for Neuroscience and Neuroengineering, South-Central University for Nationalities, Wuhan 430074, P. R. China.

Corresponding Author:

\*Tel/Fax: +86-10-58808891. E-mail: [cmc@bnu.edu.cn](mailto:cmc@bnu.edu.cn) (M. Cui)

## Table of Contents

|                                                                                                           |    |
|-----------------------------------------------------------------------------------------------------------|----|
| General Procedures.....                                                                                   | 3  |
| Chemistry.....                                                                                            | 4  |
| The Purity Determination.....                                                                             | 11 |
| Spectroscopic Determinations.....                                                                         | 11 |
| Fluorescence Spectral Measurements of the NIR Probes with A $\beta$ Aggregates and BSA.....               | 22 |
| <i>In Vitro</i> Fluorescent Staining.....                                                                 | 24 |
| <i>In vitro</i> Inhibition Binding Assays Using A $\beta$ Aggregates.....                                 | 30 |
| Blood-Brain Barrier (BBB) Penetrating studies of BBTOM-3.....                                             | 31 |
| <i>In Vivo</i> Near-Infrared Imaging.....                                                                 | 32 |
| <i>Ex Vivo</i> Fluorescent Staining of BBTOM-3 to A $\beta$ Plaques in the Brain of Transgenic Mouse..... | 32 |
| Photo-isomerization.....                                                                                  | 34 |
| NMR and MS Spectra of All Compounds.....                                                                  | 35 |
| References.....                                                                                           | 54 |

## General Procedures.

All solvents and chemicals were purchased from commercial products and used without further purification unless otherwise stated. Reactions were monitored by thin layer chromatography: Silica gel 60 F<sub>254</sub> plates (Merck). Flash column chromatography was manipulated using silica gel (45 - 75  $\mu\text{m}$ , Yantai Industry Research Institute). Synthetic A $\beta$ <sub>1-42</sub> and A $\beta$ <sub>1-40</sub> were purchased from PEPTIDE INSTITUTE, Inc. (Japan), and the aggregation was performed using the procedures reported previously<sup>1</sup> for *in vitro* assays. <sup>1</sup>H NMR and <sup>13</sup>C NMR spectra were recorded on a Bruker Avance III (400 MHz or 100 MHz) NMR spectrometer in CDCl<sub>3</sub> or DMSO-*d*<sub>6</sub> solutions at room temperature. Chemical shift ( $\delta$ ) is reported in ppm downfield from tetramethylsilane and coupling constants (*J*) are reported in Hertz (Hz), and the multiplicity is defined by s (singlet), d (doublet), t (triplet), or m (multiplet). MS and HRMS spectra were obtained by the Surveyor MSQ Plus (ESI) (Waltham, MA, USA) instrument. Fluorescence spectra were measured on a SHIMADZU RF-5301PC spectrofluorophotometer (Japan). Rhodamine 6G was used as a standard ( $\Phi = 0.76$  in H<sub>2</sub>O)<sup>2</sup> to measure fluorescence quantum yields of all of the samples. UV-visible spectra were carried out on the SHIMADZU UV-3600 UV-Vis spectrophotometer (Japan). HPLC was conducted on an Agilent 1260 Infinity Quaternary LC (Agilent Technologies) system. The sample was analyzed on a Venusil MP C18 reverse column (Agela Technologies, 5  $\mu\text{m}$ , 4.6 mm  $\times$  250 mm) eluted with an isocratic system at a flow rate of 1.0 mL/min. The mobile phase A was water while B was acetonitrile. The purity of the compounds were analyzed by HPLC, and were found to be more than 95%. Fluorescence observation was performed by the Axio Observer Z1 inverted fluorescence microscope (Zeiss, Germany) equipped with DAPI, AF488, AF546 and CY5 filter sets. Male ICR

mice (5 weeks, 18-22 g) used for brain uptake studies were purchased from Vital River Laboratories (China). Double transgenic mice (C57BL6, APPsw/PSEN1, 22-month old) used as an Alzheimer's model and age matched control mice (C57BL6, 22-month old) were purchased from the Institute of Laboratory Animal Sciences, Chinese Academy of Medical Sciences. Postmortem brain tissues from autopsy confirmed cases of AD patients (91-year old, male; 68-year old, female; 64-year old, female; 70-year old, male; temporal lobe) were obtained from the Chinese Brain Bank Center (CBBC). All protocols requiring the use of animals were approved by the animal care committee of Beijing Normal University.

## Chemistry.

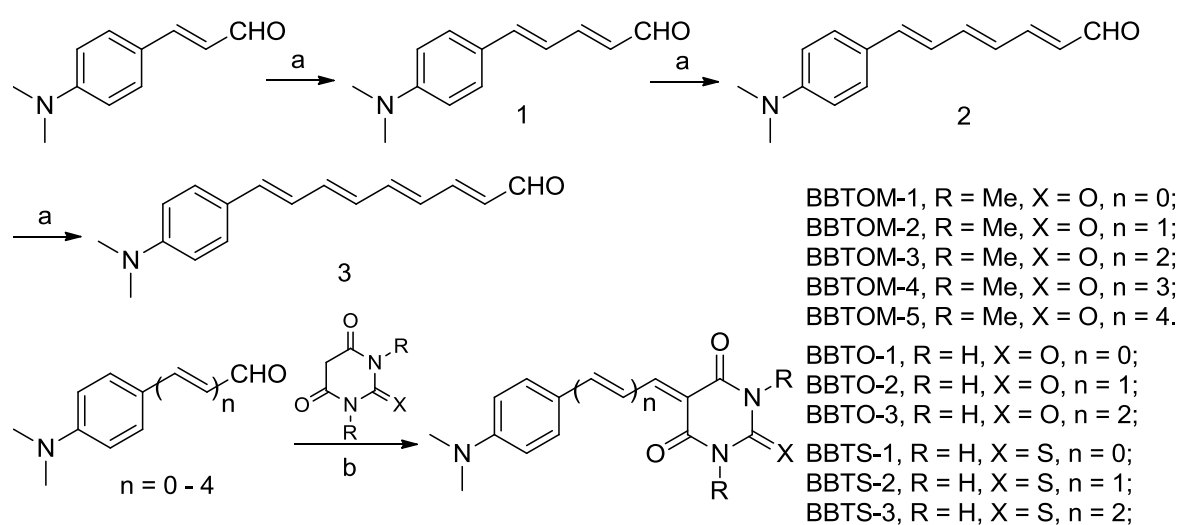

Scheme S1. Reagents and conditions: (a) (1) ((1,3-Dioxolan-2-yl)methyl)triphenylphosphonium bromide, anhydrous THF, 18-crown-6, NaH, r.t., 12 h; (2) 1 M HCl, r.t., 30 min. (b) For BBTO 1-3 and BBTS 1-3, DMF, reflux; for BBTOM-1 and BBTOM-2, piperidine, EtOH, r.t., 15 min; for BBTOM-3, BBTOM-4 and BBTOM-5, K<sub>2</sub>CO<sub>3</sub>, EtOH, reflux.

**(2E,4E)-5-(4-(Dimethylamino)phenyl)penta-2,4-dienal (1)**

(E)-3-(4-(dimethylamino)phenyl)acrylaldehyde (371.0 mg, 2.1 mmol) was completely dissolved by anhydrous THF (20 mL) in a 100 mL round bottom flask charged a stirrer, the solution was added with ((1,3-Dioxolan-2-yl)methyl)triphenylphosphonium bromide (1.37 g, 3.2 mmol), NaH (254.0 mg, 10.6 mmol) and 18-crown-6 (50.0 mg) successively. The reaction mixture was stirred at room temperature overnight. Then 20 mL of aqueous HCl (1 M) was added to quench the reaction, the mixture was stirred for 30 min and neutralized with ammonia water then extracted with CH<sub>2</sub>Cl<sub>2</sub> (3 × 50 mL). The combined organic extracts were dried over anhydrous Na<sub>2</sub>SO<sub>4</sub>. The solvents were evaporated under vacuum and the crude product was purified by flash column chromatography (petroleum ether/dichloromethane = 1 : 3, v/v) to yield compound **1** as yellow crystalline solids (250.3 mg, 58.6%). <sup>1</sup>H NMR (400 MHz, CDCl<sub>3</sub>) δ: 9.56 (d, *J* = 8.1 Hz, 1H), 7.41 (d, *J* = 8.9 Hz, 2H), 7.32 - 7.21 (m, 1H), 6.95 (d, *J* = 15.3 Hz, 1H), 6.82 (dd, *J* = 15.3, 10.9 Hz, 1H), 6.68 (d, *J* = 8.8 Hz, 2H), 6.18 (dd, *J* = 15.0, 8.1 Hz, 1H), 3.03 (s, 6H).

**(2E,4E,6E)-7-(4-(Dimethylamino)phenyl)hepta-2,4,6-trienal (2)**

The same reaction as described above to prepare compound **1** was used, and the crude product was purified by flash column chromatography (petroleum ether/dichloromethane = 1 : 3, v/v). Compound **2** was obtained as dark red crystalline solids (116.8 mg, 41.4%). <sup>1</sup>H NMR (400 MHz, CDCl<sub>3</sub>) δ: 9.56 (d, *J* = 8.1 Hz, 1H), 7.35 (d, *J* = 8.8 Hz, 2H), 7.18 (dd, *J* = 15.0, 11.3 Hz, 1H), 6.86 - 6.80 (m, 1H), 6.78 - 6.72 (m, 2H), 6.68 (d, *J* = 8.6 Hz, 2H), 6.47 (dd, *J* = 15.0, 8.1 Hz, 1H), 6.14 (dd, *J* = 15.0, 8.0 Hz, 1H), 3.00 (s, 6H). MS: *m/z* calcd for C<sub>15</sub>H<sub>18</sub>NO 228.1; found 228.1, M + H<sup>+</sup>.

**(2E,4E,6E,8E)-9-(4-(dimethylamino)phenyl)nona-2,4,6,8-tetraenal (3)**

The same reaction as described above to prepare compound **1** was used, and the crude product was

purified by flash column chromatography (petroleum ether/dichloromethane = 1 : 3, v/v). Compound **3** was obtained as purple crystalline solids (30.0 mg, 35.9%). <sup>1</sup>H NMR (400 MHz, CDCl<sub>3</sub>) δ: 9.56 (d, *J* = 8.1 Hz, 1H), 7.35 (d, *J* = 8.4 Hz, 2H), 7.16 (dd, *J* = 15.0, 11.3 Hz, 1H), 6.79 - 6.61 (m, 6H), 6.48-6.35 (m, 2H), 6.14 (dd, *J* = 15.0, 8.0 Hz, 1H), 3.01 (s, 6H). MS: *m/z* calcd for C<sub>17</sub>H<sub>20</sub>NO 254.1; found 254.1, M + H<sup>+</sup>.

### **5-(4-(Dimethylamino)benzylidene)-1,3-dimethylpyrimidine-2,4,6(1H,3H,5H)-trione**

#### **(BBTOM-1)**

4-(Dimethylamino)benzaldehyde (34.0 mg, 0.2 mmol) and 1,3-dimethylbarbituric acid (34.0 mg, 0.2 mmol) were dissolved in 10 mL ethanol. Piperidine (50 μL) was added as catalyst and the reaction mixture was stirred for 15 min at room temperature. The precipitate was collected by filtration, dried, and weighed. The final product was obtained as red crystal (43.2 mg, 72.3%). <sup>1</sup>H NMR (400 MHz, DMSO-*d*<sub>6</sub>) δ: 8.41 (d, *J* = 9.2 Hz, 2H), 8.22 (s, 1H), 6.80 (d, *J* = 9.2 Hz, 2H), 3.21 (s, 6H), 3.13 (s, 6H). <sup>13</sup>C NMR (100 MHz, DMSO-*d*<sub>6</sub>) δ: 163.2, 161.1, 156.3, 154.2, 151.2, 139.0, 120.0, 111.2, 109.3, 28.4, 27.8. MS: *m/z* calcd for C<sub>15</sub>H<sub>18</sub>N<sub>3</sub>O<sub>3</sub> 288.1; found 287.9, M + H<sup>+</sup>.

### **(E)-5-(3-(4-(Dimethylamino)phenyl)allylidene)-1,3-dimethylpyrimidine-2,4,6(1H,3H,5H)-trione**

#### **(BBTOM-2)**

The same reaction as described above to prepare BBTOM-1 was used, and the final product was obtained as purple crystalline solids (56.8 mg, 46.2%). <sup>1</sup>H NMR (400 MHz, CDCl<sub>3</sub>) δ: 8.42 (dd, *J* = 14.8, 12.5 Hz, 1H), 8.20 (d, *J* = 12.4 Hz, 1H), 7.60 (d, *J* = 8.9 Hz, 2H), 7.40 (d, *J* = 14.8 Hz, 1H), 6.69 (d, *J* = 8.9 Hz, 2H), 3.38 (s, 6H), 3.10 (s, 6H). <sup>13</sup>C NMR (100 MHz, CDCl<sub>3</sub>) δ: 163.0, 162.4,

158.6, 157.1, 153.0, 151.8, 132.1, 123.6, 120.6, 112.0, 110.0, 40.2, 28.5, 27.8. MS: m/z calcd for (M + H<sup>+</sup>) 314.2; found 314.0.

**5-((2E,4E)-5-(4-(Dimethylamino)phenyl)penta-2,4-dien-1-ylidene)-1,3-dimethylpyrimidine-2,4,6(1H,3H,5H)-trione (BBTOM-3)**

Compound 1 (30.2 mg, 0.2 mmol) and 1,3-dimethylbarbituric acid (45.3 mg, 0.3 mmol) were dissolved in 10 mL ethanol, 1 mg K<sub>2</sub>CO<sub>3</sub> was added as catalyst. The reaction mixture was refluxed for 15 min, then the solvents were evaporated under vacuum and the crude product was purified by flash column chromatography (petroleum ether/dichloromethane = 1 : 2, v/v) and the final product was obtained as brown crystalline solids (74.3 mg, 53.2%). <sup>1</sup>H NMR (400 MHz, CDCl<sub>3</sub>) δ: 8.11 (d, *J* = 12.5 Hz, 1H), 8.04 - 7.98 (m, 1H), 7.42 (d, *J* = 8.9 Hz, 2H), 7.31 - 7.28 (m, 1H), 7.00 - 6.92 (m, 2H), 6.69 (d, *J* = 8.8 Hz, 2H), 3.38 (s, 3H), 3.37 (s, 3H), 3.06 (s, 6H). <sup>13</sup>C NMR (100 MHz, CDCl<sub>3</sub>) δ: 162.8, 162.0, 157.3, 151.8, 151.7, 145.9, 130.0, 126.9, 123.9, 123.8, 112.0, 111.1, 40.1, 28.5, 27.9. MS: m/z calcd for C<sub>19</sub>H<sub>22</sub>N<sub>3</sub>O<sub>3</sub> 340.1661; found 340.1664, M + H<sup>+</sup>.

**5-((2E,4E,6E)-7-(4-(Dimethylamino)phenyl)hepta-2,4,6-trien-1-ylidene)-1,3-dimethylpyrimidine-2,4,6(1H,3H,5H)-trione (BBTOM-4)**

The same reaction as described above to prepare BBTOM-3 was used. The crude product was purified by flash column chromatography (petroleum ether/dichloromethane = 2 : 1, v/v) and the final produce was obtained as black crystalline solids (16.3 mg, 30.0%). <sup>1</sup>H NMR (400 MHz, CDCl<sub>3</sub>) δ: 8.08 (d, *J* = 12.6 Hz, 1H), 8.00 - 7.93 (m, 1H), 7.38 (d, *J* = 8.9 Hz, 2H), 7.20 (dd, *J* = 14.0, 11.6 Hz, 1H), 6.94 - 6.87 (m, 1H), 6.81 (s, 1H), 6.79 (d, *J* = 5.4 Hz, 1H), 6.67 (d, *J* = 8.9 Hz, 2H), 6.58 (dd, *J*

= 14.0, 11.6 Hz, 1H), 3.37 (s, 3H), 3.36 (s, 3H), 3.03 (s, 6H). <sup>13</sup>C NMR (100 MHz, CDCl<sub>3</sub>) δ: 162.7, 162.0, 157.0, 156.2, 151.7, 151.2, 150.2, 146.6, 141.1, 130.0, 129.0, 128.4, 127.8, 126.1, 124.5, 124.0, 119.2, 112.1, 111.7, 40.2, 28.6, 28.0. MS: m/z calcd for C<sub>21</sub>H<sub>24</sub>N<sub>3</sub>O<sub>3</sub> 366.1818; found 366.1818, M + H<sup>+</sup>.

**5-((2E,4E,6E,8E)-9-(4-(Dimethylamino)phenyl)nona-2,4,6,8-tetraen-1-ylidene)-1,3-dimethylpyrimidine-2,4,6(1H,3H,5H)-trione (BBTOM-5)**

The same reaction as described above to prepare BBTOM-3 was used. The crude product was purified by flash column chromatography (petroleum ether/dichloromethane = 1 : 3, v/v) and the final produce was obtained as atropurpureus solid (21.0 mg, 89.4%). <sup>1</sup>H NMR (400 MHz, DMSO-*d*<sub>6</sub>) δ: 7.96 (d, *J* = 12.4 Hz, 1H), 7.90 - 7.83 (m, 1H), 7.49 - 7.43 (m, 1H), 7.38 (d, *J* = 8.8 Hz, 2H), 7.00 - 6.77 (m, 4H), 6.74 - 6.64 (m, 3H), 6.57 - 6.50 (m, 1H), 3.19 (s, 3H), 3.18 (s, 3H), 2.96 (s, 6H). <sup>13</sup>C NMR (100 MHz, CDCl<sub>3</sub>) δ: 162.6, 161.9, 156.7, 155.5, 151.6, 150.7, 145.5, 141.9, 138.2, 131.0, 130.2, 128.5, 128.3, 125.0, 124.4, 112.2, 112.1, 40.2, 28.6, 28.0. MS: m/z calcd for C<sub>23</sub>H<sub>26</sub>N<sub>3</sub>O<sub>3</sub> 392.1974; found 393.1968, M + H<sup>+</sup>.

**5-(4-(Dimethylamino)benzylidene)pyrimidine-2,4,6(1H,3H,5H)-trione (BBTO-1)**

4-(Dimethylamino)benzaldehyde (33.6 mg, 0.2 mmol) and barbituric acid (28.8 mg, 0.2 mmol) were dissolved in 3 mL DMF. The reaction mixture was refluxed for 10 min, then cooled to precipitate BBTO-1 as red crystalline solids (17.2 mg, 30.1%). <sup>1</sup>H NMR (400 MHz, DMSO-*d*<sub>6</sub>) δ: 8.42 (d, *J* = 9.2 Hz, 2H), 8.15 (s, 1H), 7.80 (d, *J* = 9.2 Hz, 2H), 3.12 (s, 6H). <sup>13</sup>C NMR (100 MHz, DMSO-*d*<sub>6</sub>) δ: 164.6, 162.7, 155.4, 154.1, 150.3, 139.0, 120.0, 111.1, 109.5. MS: m/z



calcd for C<sub>13</sub>H<sub>13</sub>N<sub>3</sub>O<sub>3</sub>Na 282.1; found 282.1, M + Na<sup>+</sup>.

**(E)-5-(3-(4-(Dimethylamino)phenyl)allylidene)pyrimidine-2,4,6-(1H,3H,5H)-trione (BBTO-2)**

The same reaction as described above to prepare BBTO-1 was used, and the final product was obtained as atropurpureus crystalline solids (53.0 mg, 80.1%). <sup>1</sup>H NMR (400 MHz, DMSO-*d*<sub>6</sub>) δ: 8.22 (dd, *J* = 15.0, 12.4 Hz, 1H), 7.98 (d, *J* = 12.3 Hz, 1H), 7.62 (d, *J* = 15.0 Hz, 1H), 7.55 (d, *J* = 8.9 Hz, 2H), 6.80 (d, *J* = 8.9 Hz, 2H), 3.06 (s, 6H). <sup>13</sup>C NMR (100 MHz, DMSO-*d*<sub>6</sub>) δ: 163.6, 163.3, 156.0, 155.4, 152.8, 150.42, 131.5, 122.7, 119.0, 112.0, 110.4. MS: *m/z* calcd for C<sub>15</sub>H<sub>16</sub>N<sub>3</sub>O<sub>3</sub> 286.1; found 285.9, M + H<sup>+</sup>.

**5-((2E,4E)-5-(4-(Dimethylamino)phenyl)penta-2,4-dien-1-ylidene)pyrimidine-2,4,6(1H,3H,5H)-trione (BBTO-3)**

The same reaction as described above to prepare BBTO-1 was used, and the final product was obtained as atropurpureus crystalline solids (40.0 mg, 64.4%). <sup>1</sup>H NMR (400 MHz, DMSO-*d*<sub>6</sub>) δ: 7.93 - 7.82 (m, 2H), 7.53 (d, *J* = 8.9 Hz, 2H), 7.51 - 7.45 (m, 1H), 7.13 - 7.11 (m, 2H), 6.73 (d, *J* = 8.9 Hz, 2H), 3.01 (s, 6H). <sup>13</sup>C NMR (100 MHz, DMSO-*d*<sub>6</sub>) δ: 163.6, 156.0, 152.8, 150.4, 150.4, 131.5, 130.0, 125.6, 123.7, 122.7, 119.0, 112.0, 112.0. MS: *m/z* calcd for C<sub>17</sub>H<sub>17</sub>N<sub>3</sub>O<sub>3</sub>Na 334.1; found 334.1, M + Na<sup>+</sup>.

**5-(4-(Dimethylamino)benzylidene)-2-thioxodihydropyrimidine-4,6(1H,5H)-dione (BBTS-1)**

The same reaction as described above to prepare BBTO-1 was used, and the final product was obtained as crimson crystalline solids (13.4 mg, 21.2%). <sup>1</sup>H NMR (400 MHz, DMSO-*d*<sub>6</sub>) δ: 12.12 (s,

1H), 12.02 (s, 1H), 8.46 (d,  $J = 9.1$  Hz, 2H), 8.15 (s, 1H), 6.82 (d,  $J = 9.1$  Hz, 2H), 3.16 (s, 6H).  $^{13}\text{C}$  NMR (100 MHz, DMSO- $d_6$ )  $\delta$ : 177.4, 162.9, 160.4, 156.1, 154.7, 139.6, 120.4, 111.4, 109.2. MS:  $m/z$  calcd for  $\text{C}_{13}\text{H}_{14}\text{N}_3\text{O}_2\text{S}$  276.1; found 275.8,  $\text{M} + \text{H}^+$ .

**(*E*)-5-(3-(4-(Dimethylamino)phenyl)allylidene)-2-thioxodihydropyrimidine-4,6(1H,5H)-dione (BBTS-2)**

The same reaction as described above to prepare BBTO-1 was used, and the final product was obtained as purple crystalline solids (54.0 mg, 93.6%).  $^1\text{H}$  NMR (400 MHz, DMSO- $d_6$ )  $\delta$ : 8.25 (dd,  $J = 14.6, 12.6$  Hz, 1H), 8.00 (d,  $J = 12.4$  Hz, 1H), 7.72 (d,  $J = 14.8$  Hz, 1H), 7.58 (d,  $J = 8.8$  Hz, 2H), 6.82 (d,  $J = 8.8$  Hz, 2H), 3.09 (s, 6H).  $^{13}\text{C}$  NMR (100 MHz, DMSO- $d_6$ )  $\delta$ : 177.8, 161.8, 161.2, 157.7, 156.4, 153.3, 132.2, 122.8, 119.3, 112.2, 110.0. MS:  $m/z$  calcd for  $\text{C}_{15}\text{H}_{16}\text{N}_3\text{O}_2\text{S}$  302.1; found 301.8,  $\text{M} + \text{H}^+$ .

**5-((2*E*,4*E*)-5-(4-(Dimethylamino)phenyl)penta-2,4-dien-1-ylidene)-2-thioxodihydropyrimidine-4,6(1H,5H)-dione (BBTS-3)**

The same reaction as described above to prepare BBTO-1 was used. The final product was obtained as dark green crystalline solids (14.5 mg, 29.5%).  $^1\text{H}$  NMR (400 MHz, DMSO- $d_6$ )  $\delta$ : 12.15 (s, 1H), 12.09 (s, 1H), 7.96 - 7.83 (m, 2H), 7.60 - 7.56 (m, 3H), 7.22 - 7.17 (M, 2H), 6.74 (d,  $J = 8.8$  Hz, 2H), 3.03(s, 6H).  $^{13}\text{C}$  NMR (100 MHz, DMSO- $d_6$ )  $\delta$ : 177.9, 161.7, 161.0, 158.6, 155.3, 151.9, 147.4, 130.5, 126.0, 123.8, 123.4, 112.0, 111.1. MS:  $m/z$  calcd for  $\text{C}_{17}\text{H}_{18}\text{N}_3\text{O}_2\text{S}$  327.1; found 328.0,  $\text{M} + \text{H}^+$ .

## The Purity Determination.

The purity of the compounds was determined on a HPLC system eluted with acetonitrile/water at a flow rate of 1.0 mL/min. As shown in Fig. S1, the retention time increased with the lengthening of the conjugated double bonds and the purity of these probes was higher than 95%.

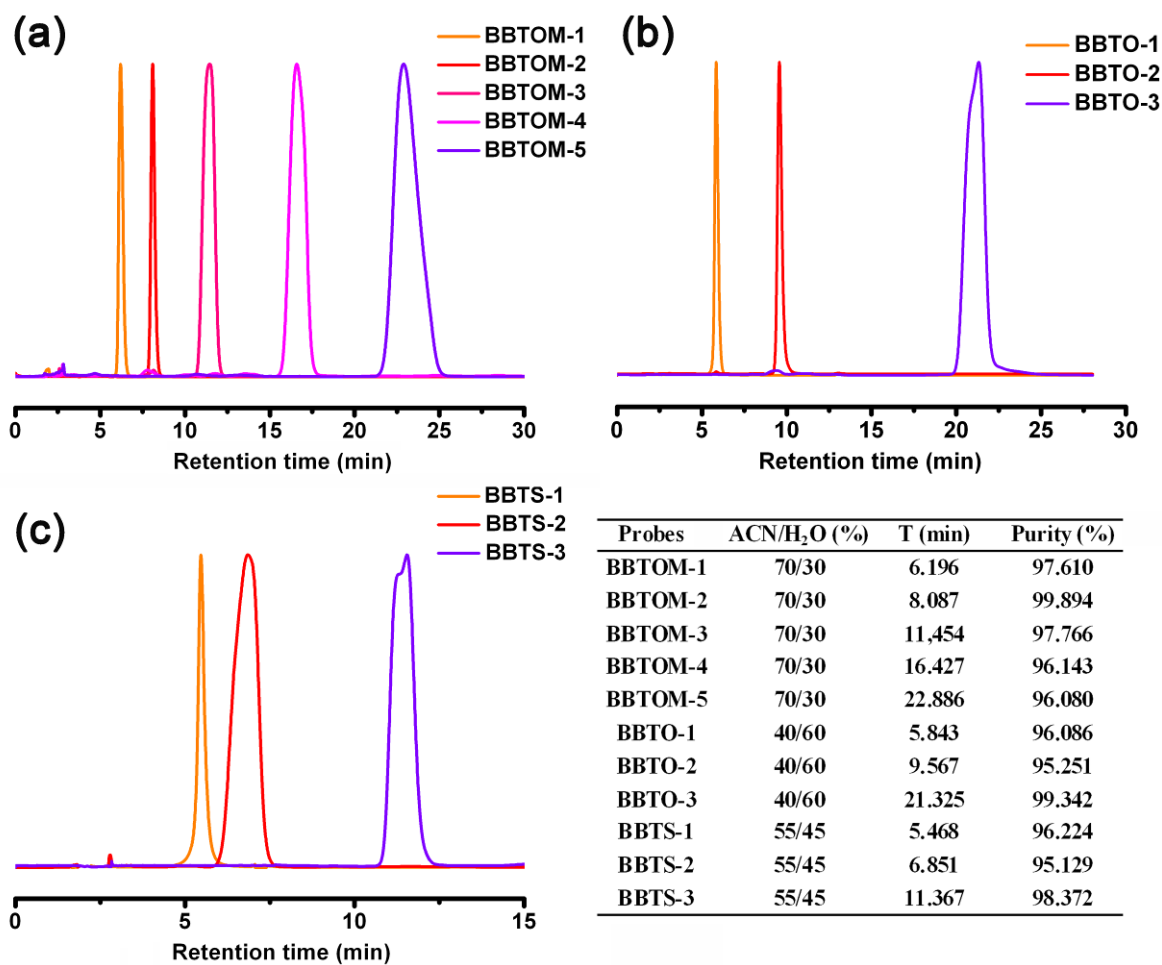

**Figure. S1** HPLC profiles of BBTOMs (A), BBTOs (B), BBTSs (C) and HPLC conditions and purity (D).

## Spectroscopic Determinations.

The fluorescence spectra were measured on a SHIMADZU RF-5301PC spectrofluorophotometer (Japan) in different solvents of CH<sub>2</sub>Cl<sub>2</sub>, DMSO, MeOH, THF and phosphate-buffered saline (PBS).

The absorption spectra are determined on the SHIMADZU UV-3600 UV-Vis spectrophotometer (Japan) in CH<sub>2</sub>Cl<sub>2</sub>. CH<sub>2</sub>Cl<sub>2</sub> is a solvent that can simulate the hydrophobic microenvironment of the A $\beta$  fibril “binding pocket”,<sup>3</sup> then it was employed to determine the molar absorption coefficient and quantum yield. The spectroscopic data are shown in Figure S2-7 and Table S1, 2.

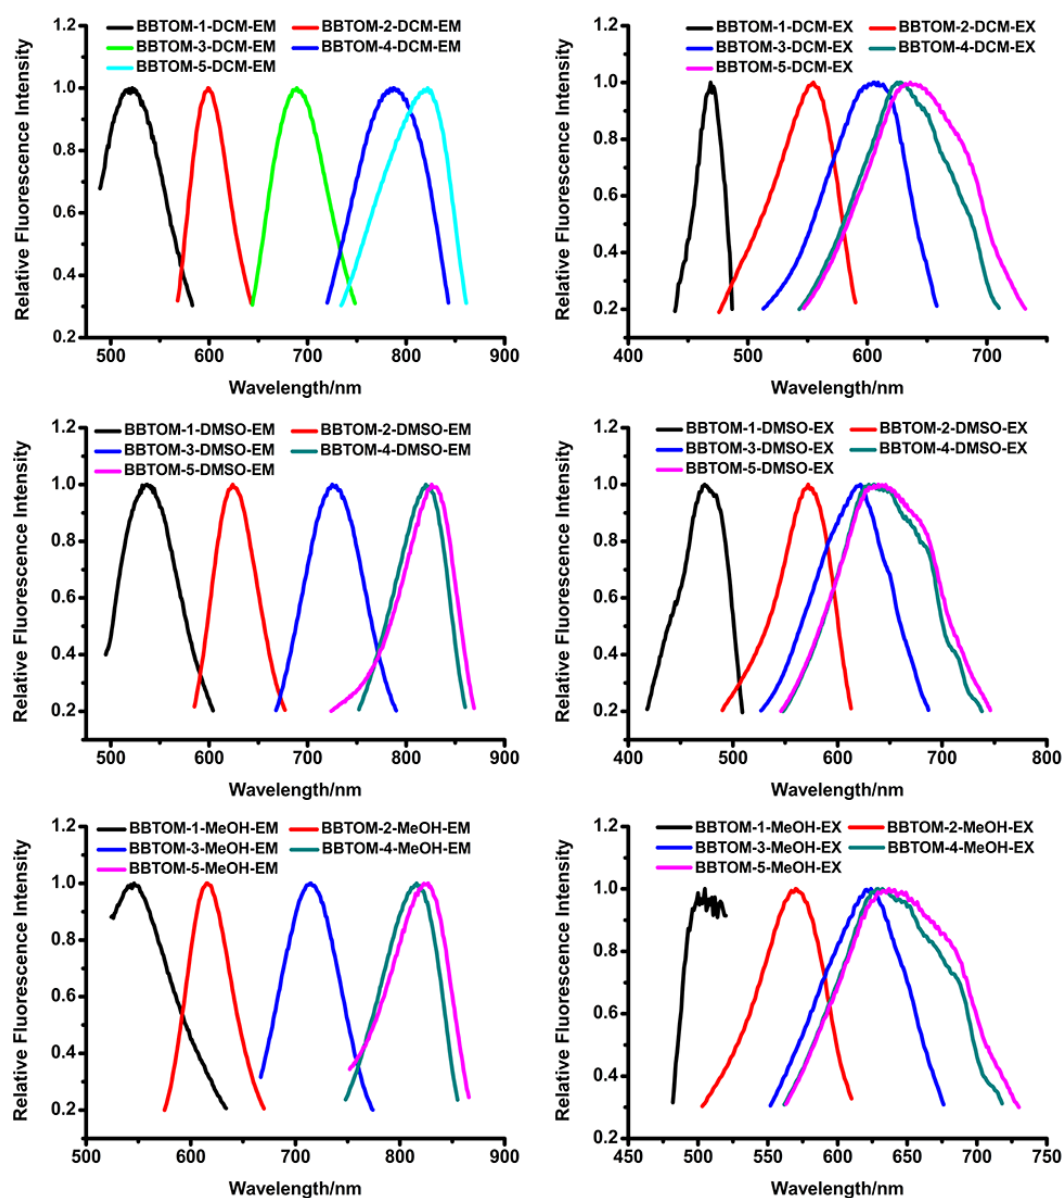

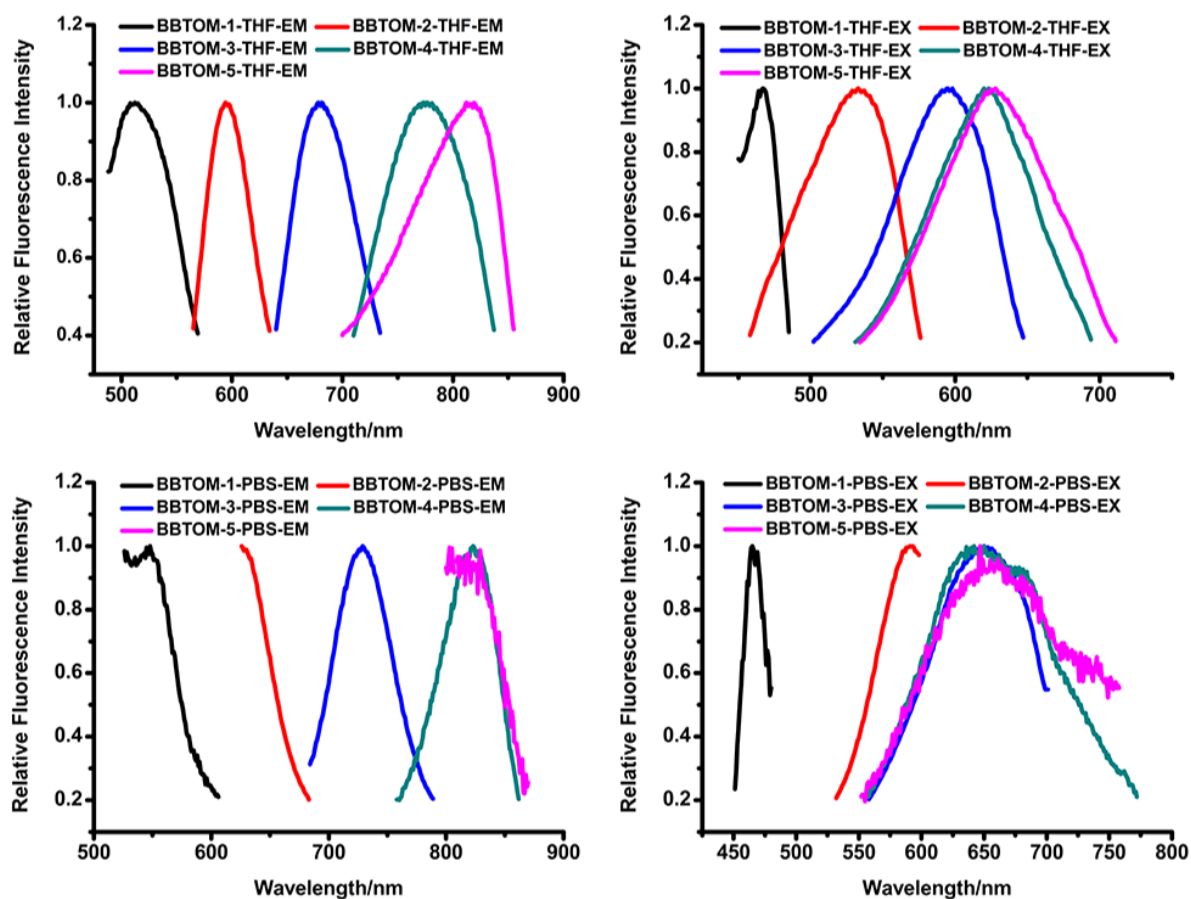

**Figure. S2** The excitation (right panel) and emission (left panel) spectra of the BBTOM1-5 in different solvents: dichloromethane, DMSO, methanol, THF and PBS (10% ethanol). The emission wavelengths of the solutions were measured at a concentration of 10  $\mu\text{M}$ .

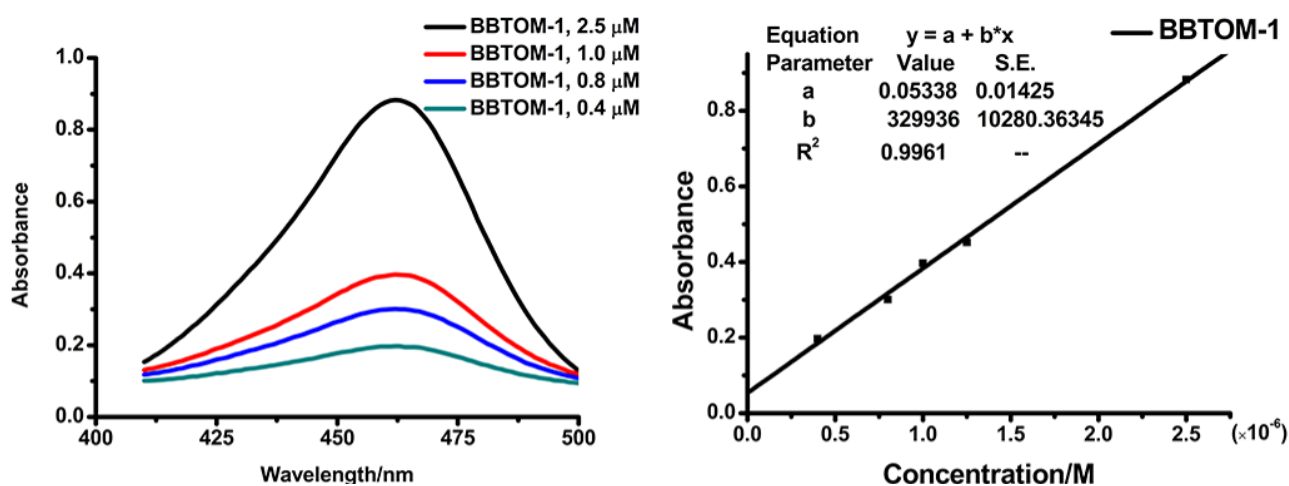

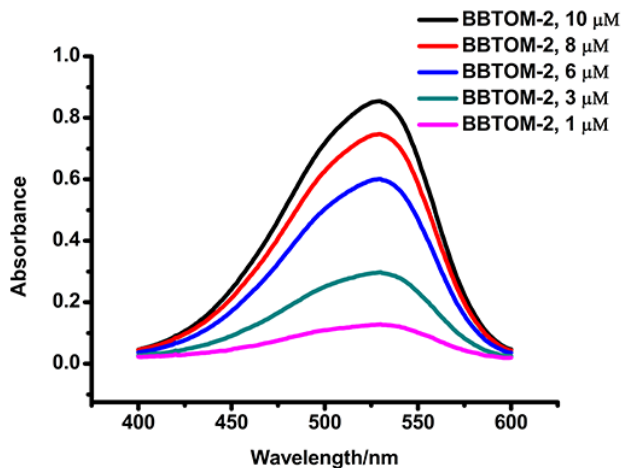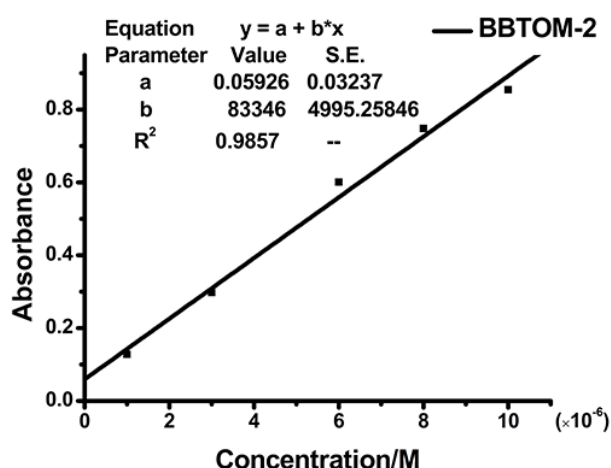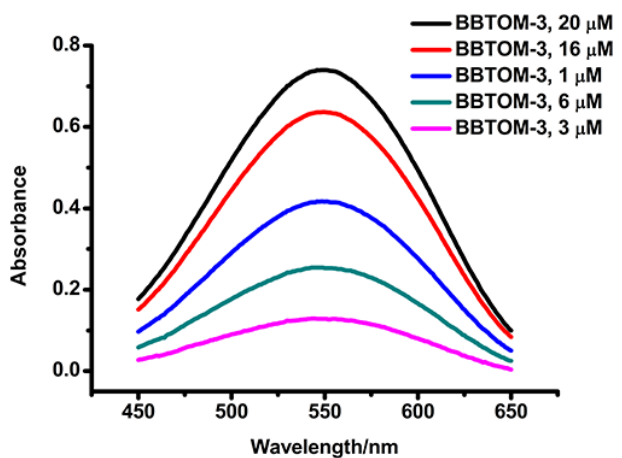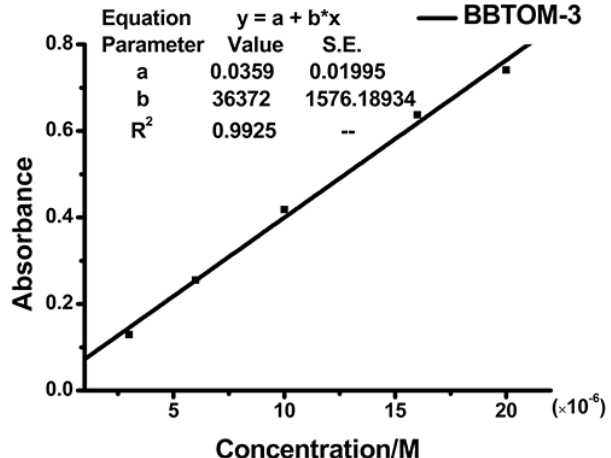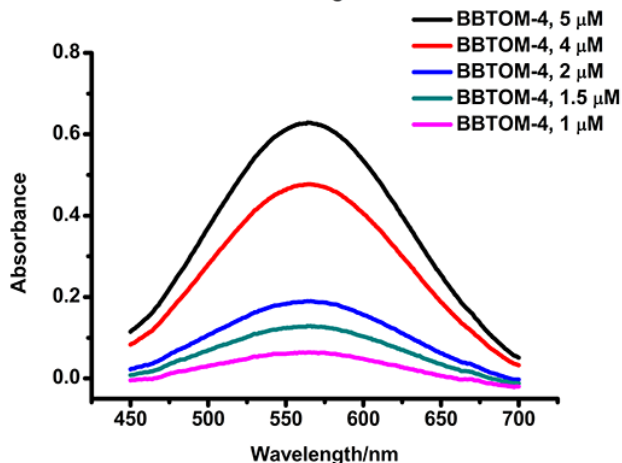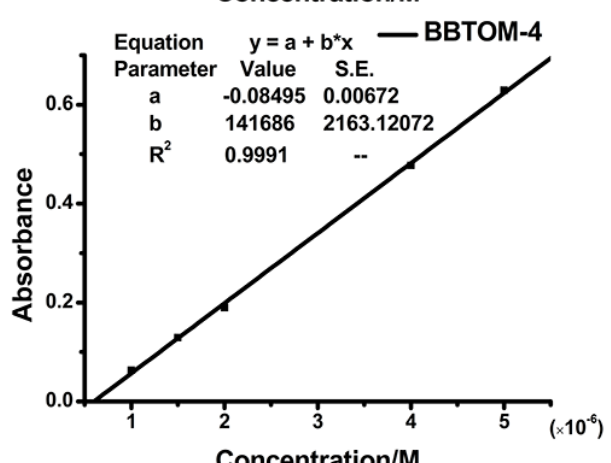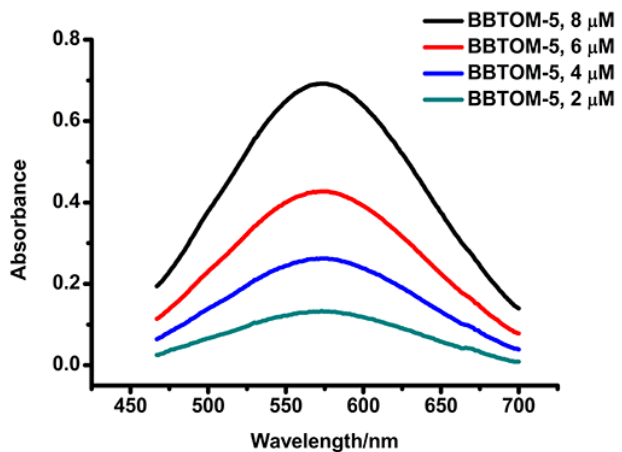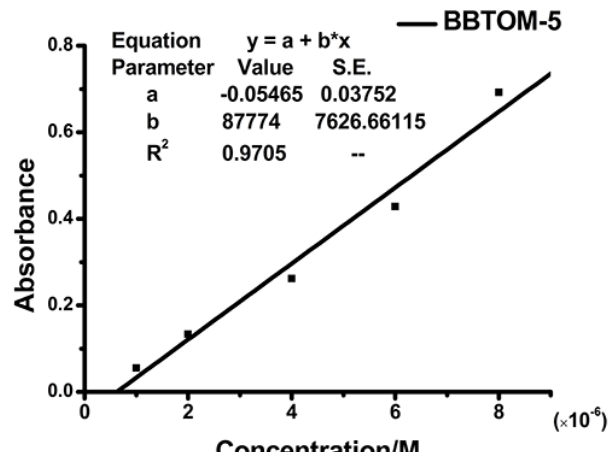

**Figure. S3** Absorption spectra (left panel) and linear fitting curve between absorbance and concentration (right panel) of the BBTOM1-5 in CH<sub>2</sub>Cl<sub>2</sub>, molar absorption coefficients ( $\epsilon$ ) equals to  
b.

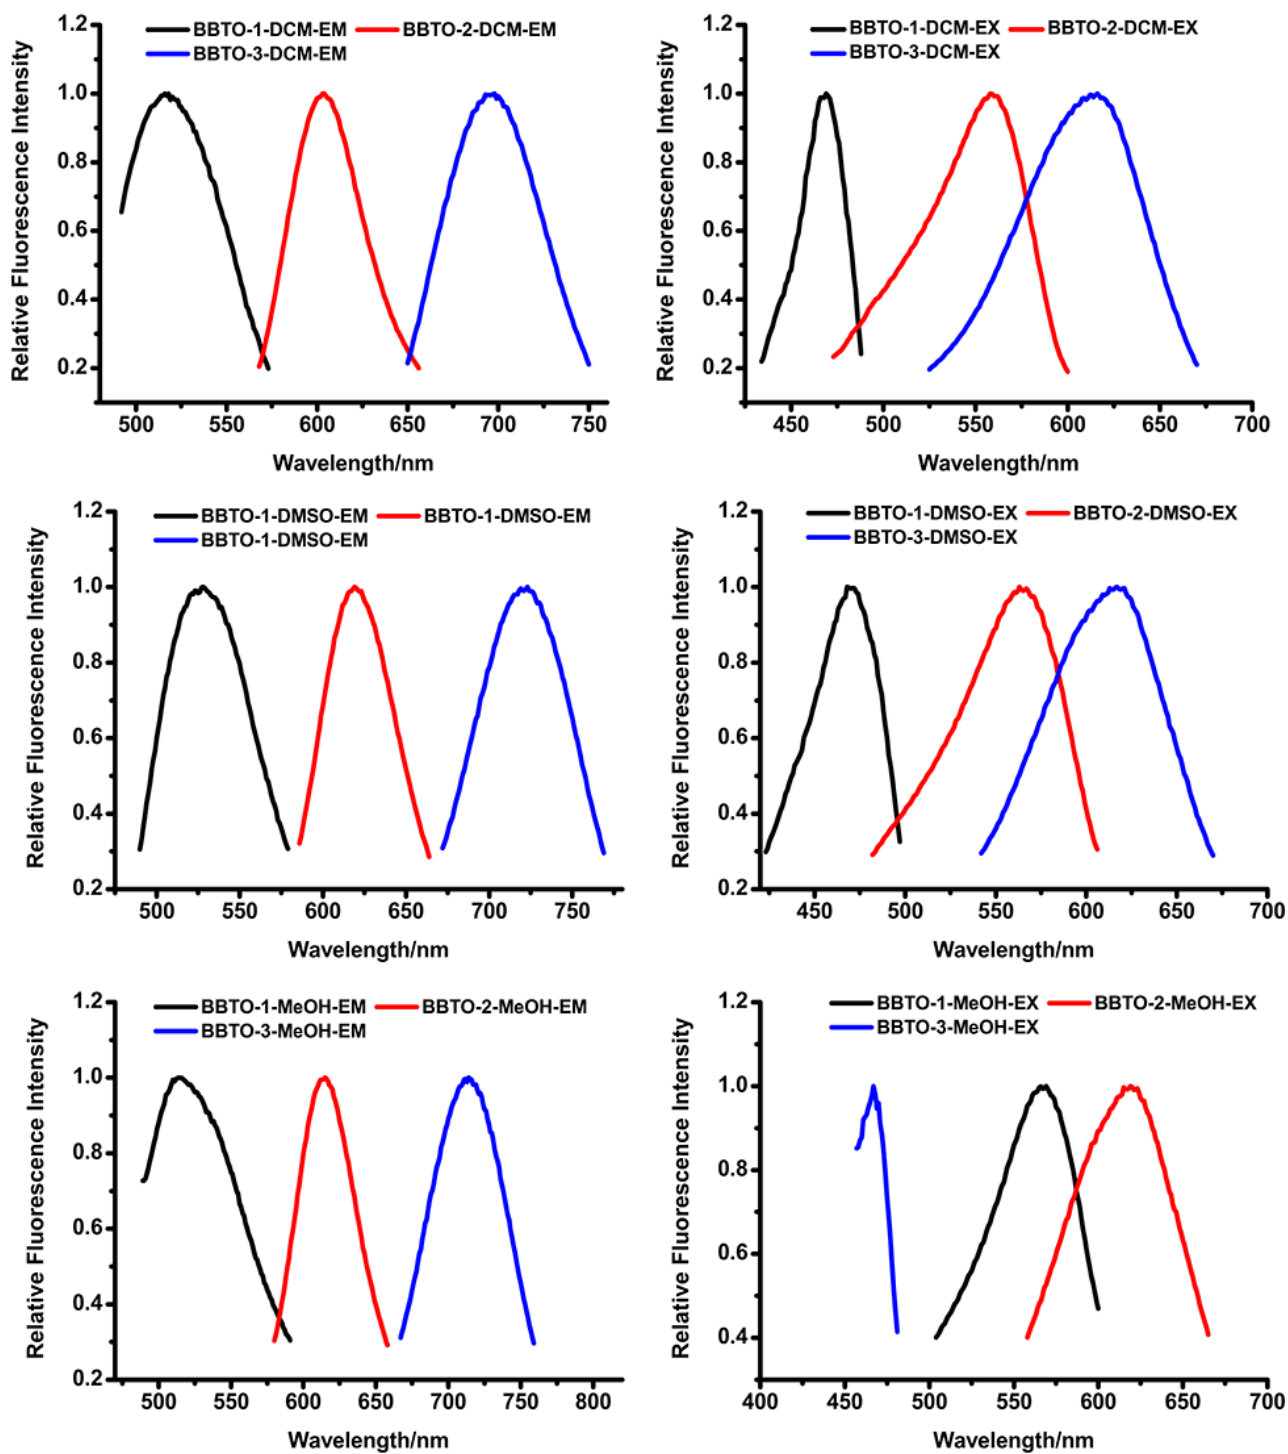

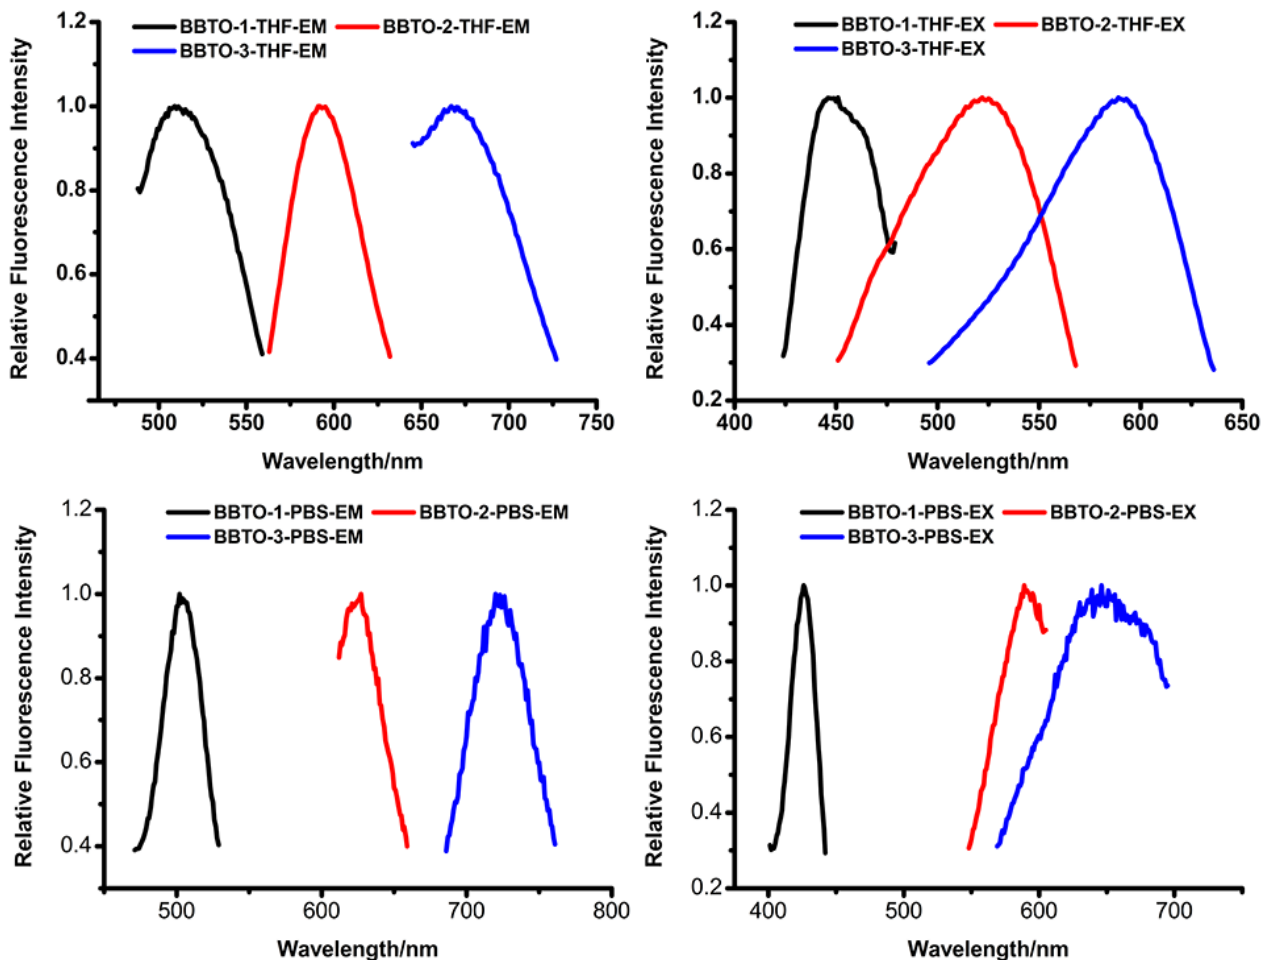

**Figure. S4** The excitation (right panel) and emission (left panel) spectra of the BBTO1-3 in different solvents: dichloromethane, DMSO, methanol, THF and PBS (10% ethanol). The emission wavelengths of the solutions were measured at a concentration of 10  $\mu\text{M}$ .

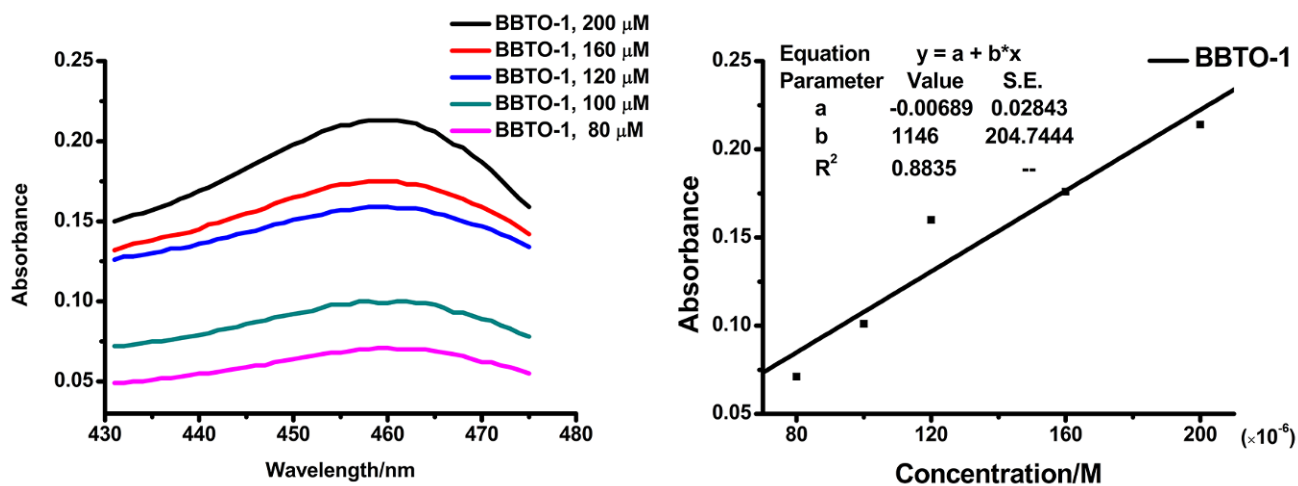



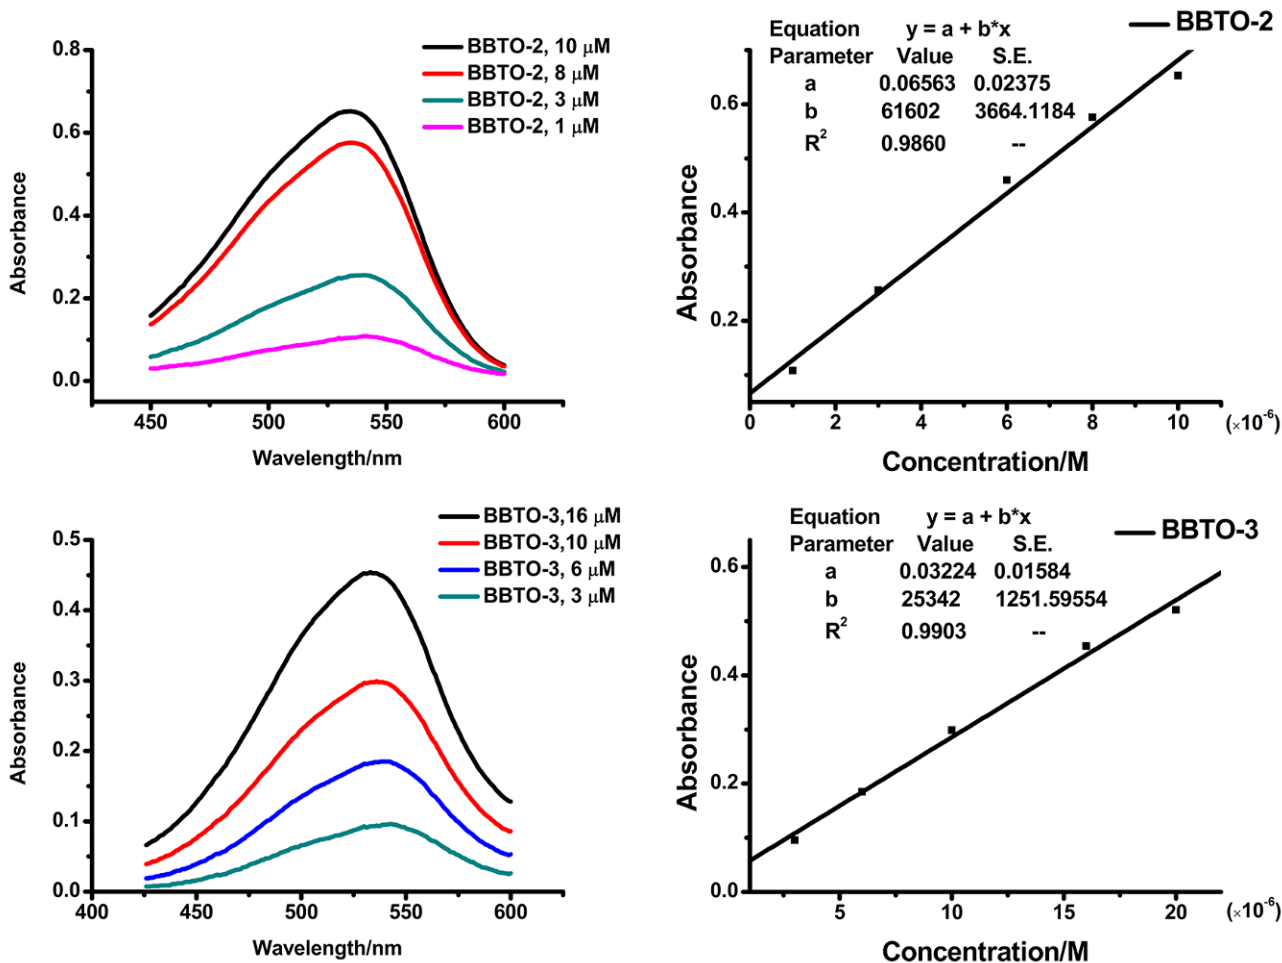

**Figure. S5** Absorption spectra (left panel) and linear fitting curve between absorbance and concentration (right panel) of the BBTO1-3 in  $\text{CH}_2\text{Cl}_2$ , molar absorption coefficients ( $\epsilon$ ) equals to b.

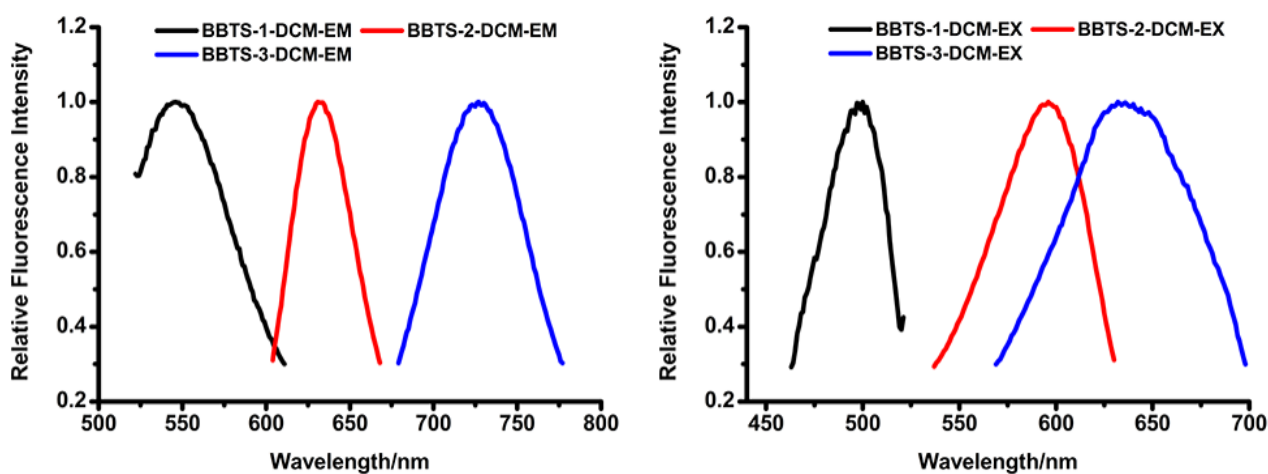

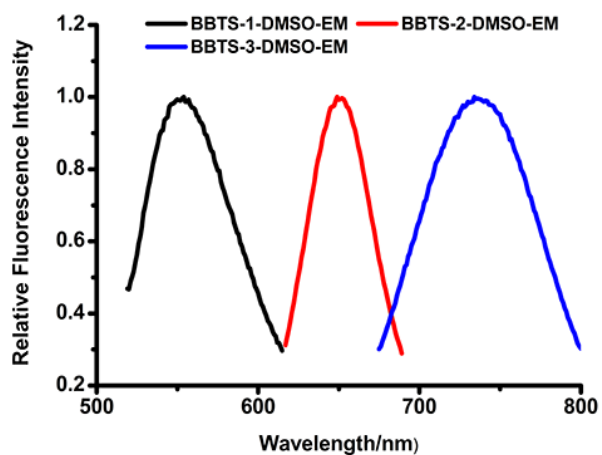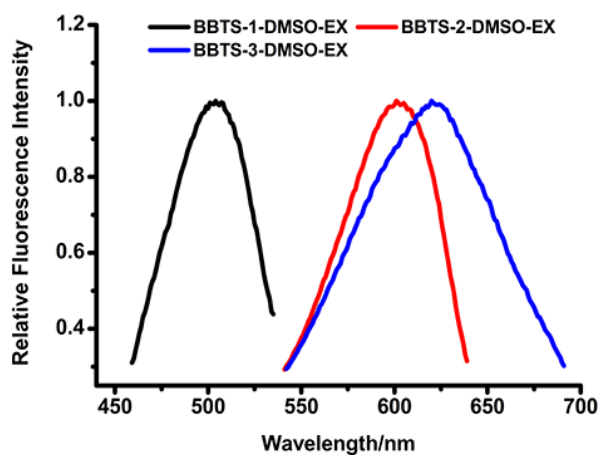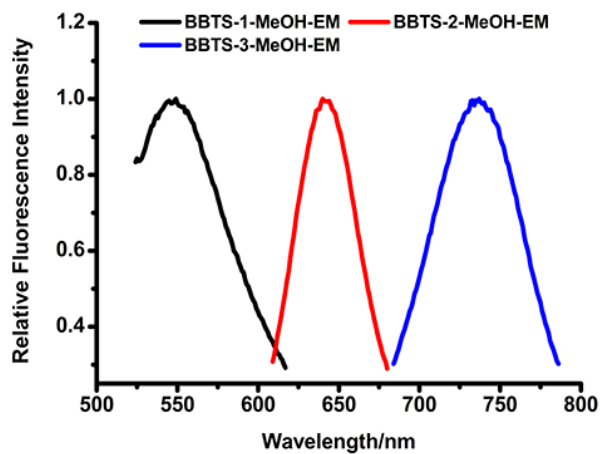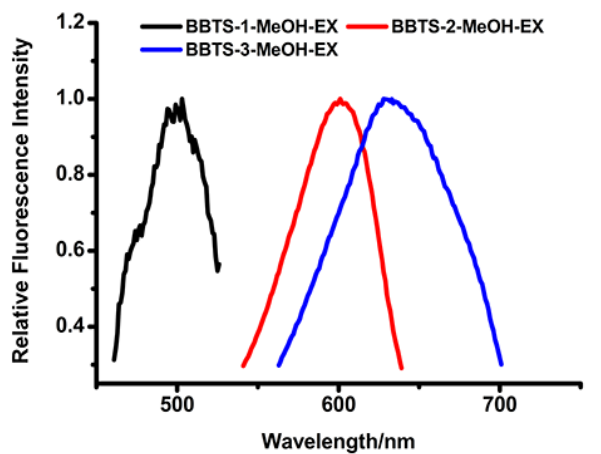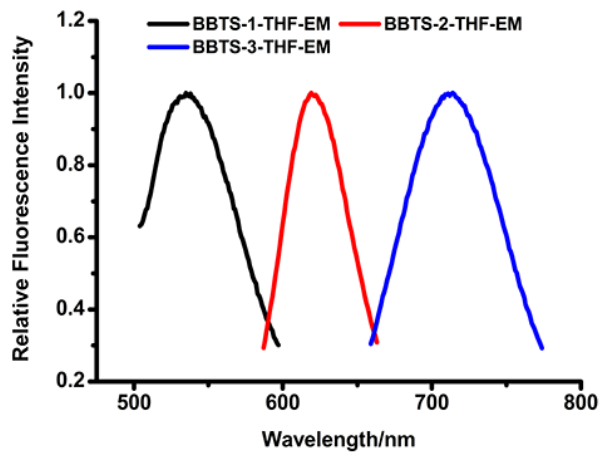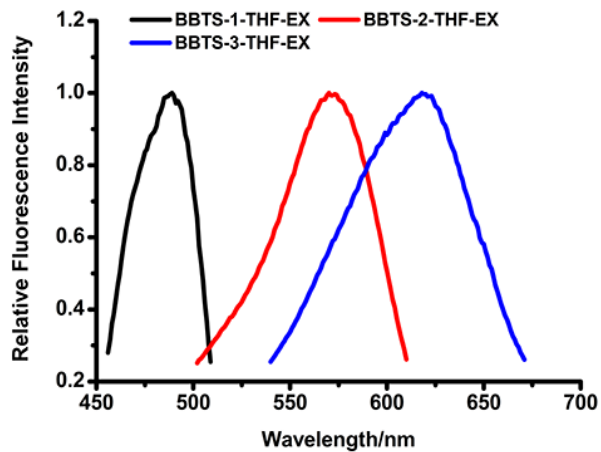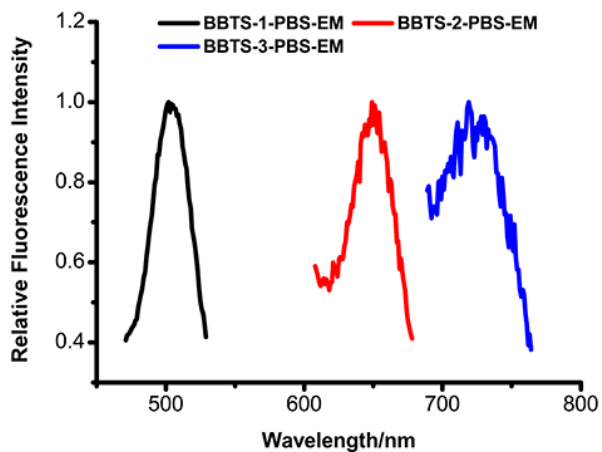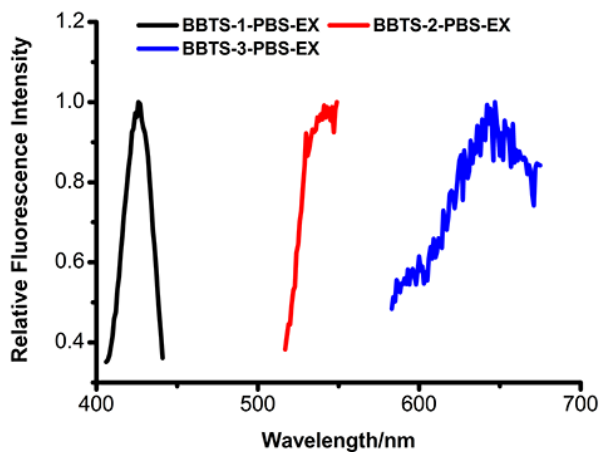

**Figure. S6** The excitation (right panel) and emission (left panel) spectra of the BBTS1-3 in different solvents: dichloromethane, DMSO, methanol, THF and PBS (10% ethanol). The emission wavelengths of the solutions were measured at a concentration of 10  $\mu\text{M}$ .

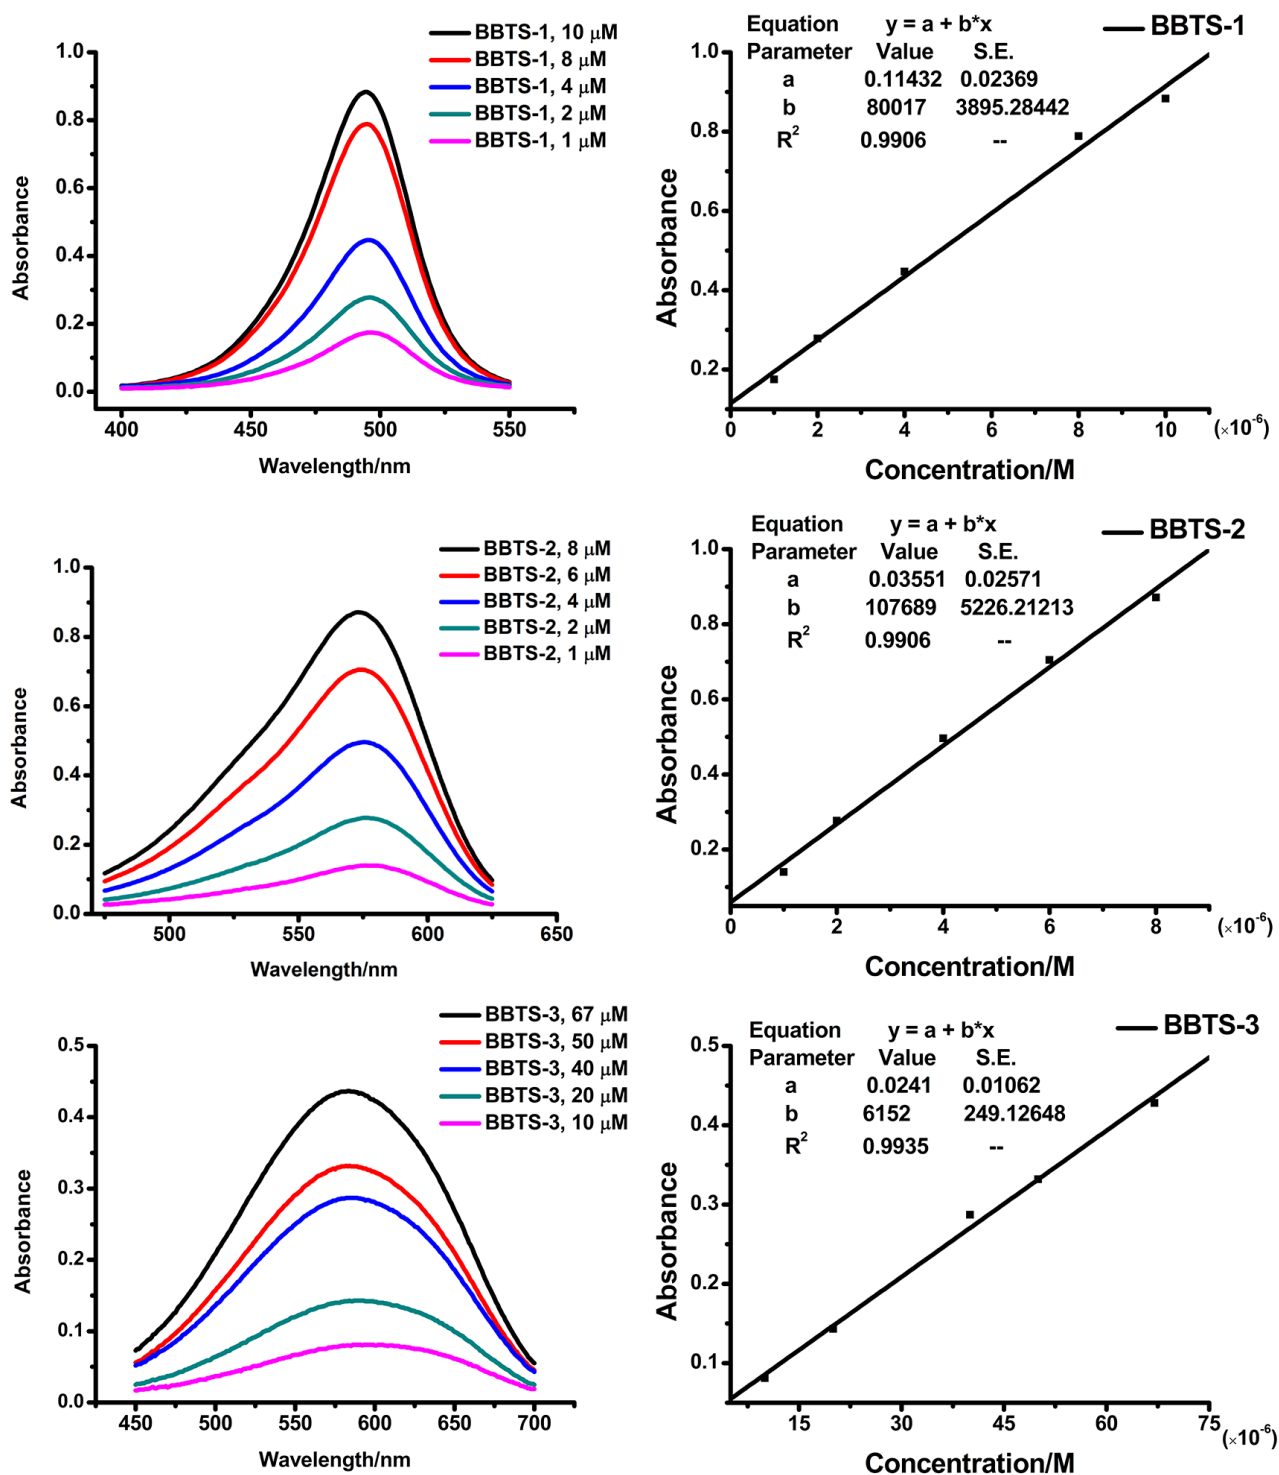

**Figure. S7** Absorption spectra (left panel) and linear fitting curve between absorbance and

concentration (right panel) of the BBTS1-3 in CH<sub>2</sub>Cl<sub>2</sub>, molar absorption coefficients ( $\epsilon$ ) equals to b.

**Table S1** The spectroscopic properties (absorption, excitation and emission wavelength, molar absorption coefficient, and fluorescence quantum yield) of BBTOM 1-5.

| Probe          | Solvent                         | Fluorescence spectrum  |                        |                      | UV-vis spectrum |                         |                                                    |
|----------------|---------------------------------|------------------------|------------------------|----------------------|-----------------|-------------------------|----------------------------------------------------|
|                |                                 | $\lambda_{em}$<br>(nm) | $\lambda_{ex}$<br>(nm) | Stokes shift<br>(nm) | $\Phi^a$<br>%   | $\lambda_{abs}$<br>(nm) | $\epsilon$<br>L mol <sup>-1</sup> cm <sup>-1</sup> |
| <b>BBTOM-1</b> | CH <sub>2</sub> Cl <sub>2</sub> | 522                    | 468                    | 54                   | 0.08            | 461.5                   | 329936                                             |
|                | DMSO                            | 537                    | 476                    | 61                   |                 |                         |                                                    |
|                | MeOH                            | 546                    | 505                    | 41                   |                 |                         |                                                    |
|                | THF                             | 512                    | 467                    | 45                   |                 |                         |                                                    |
|                | PBS                             | 550                    | 466                    | 84                   |                 |                         |                                                    |
| <b>BBTOM-2</b> | CH <sub>2</sub> Cl <sub>2</sub> | 598                    | 549                    | 49                   | 4.64            | 530                     | 83346                                              |
|                | DMSO                            | 623                    | 567                    | 56                   |                 |                         |                                                    |
|                | MeOH                            | 613                    | 568                    | 45                   |                 |                         |                                                    |
|                | THF                             | 596                    | 534                    | 62                   |                 |                         |                                                    |
|                | PBS                             | 630                    | 593                    | 37                   |                 |                         |                                                    |
|                | With $A\beta$                   | 606                    | 574                    | 32                   |                 |                         |                                                    |
| <b>BBTOM-3</b> | CH <sub>2</sub> Cl <sub>2</sub> | 691                    | 593                    | 98                   | 7.81            | 548.5                   | 36372                                              |
|                | DMSO                            | 727                    | 621                    | 106                  |                 |                         |                                                    |
|                | MeOH                            | 718                    | 619                    | 99                   |                 |                         |                                                    |
|                | THF                             | 680                    | 585                    | 95                   |                 |                         |                                                    |
|                | PBS                             | 729                    | 650                    | 79                   |                 |                         |                                                    |
|                | With $A\beta$                   | 690                    | 626                    | 64                   |                 |                         |                                                    |
| <b>BBTOM-4</b> | CH <sub>2</sub> Cl <sub>2</sub> | 788                    | 625                    | 163                  | 1.64            | 564                     | 141686                                             |
|                | DMSO                            | 820                    | 635                    | 185                  |                 |                         |                                                    |
|                | MeOH                            | 816                    | 629                    | 187                  |                 |                         |                                                    |
|                | THF                             | 773                    | 620                    | 153                  |                 |                         |                                                    |
|                | PBS                             | 823                    | 642                    | 181                  |                 |                         |                                                    |
|                | With $A\beta$                   | 793                    | 632                    | 161                  |                 |                         |                                                    |
| <b>BBTOM-5</b> | CH <sub>2</sub> Cl <sub>2</sub> | 822                    | 636                    | 186                  | 0.26            | 574.5                   | 87774                                              |
|                | DMSO                            | 826                    | 639                    | 187                  |                 |                         |                                                    |
|                | MeOH                            | 827                    | 634                    | 193                  |                 |                         |                                                    |
|                | THF                             | 817                    | 628                    | 189                  |                 |                         |                                                    |
|                | PBS                             | 829                    | 647                    | 182                  |                 |                         |                                                    |
|                | With $A\beta$                   | 822                    | 632                    | 190                  |                 |                         |                                                    |

<sup>a</sup> Measured in CH<sub>2</sub>Cl<sub>2</sub>.

**Table S2** The spectroscopic properties (absorption, excitation and emission wavelength, molar absorption coefficient, and fluorescence quantum yield) of BBTO 1-3 and BBTS 1-3.

| Probe         | Solvent                         | Fluorescence spectrum  |                        |                      | UV-vis spectrum |                         |                                                    |
|---------------|---------------------------------|------------------------|------------------------|----------------------|-----------------|-------------------------|----------------------------------------------------|
|               |                                 | $\lambda_{em}$<br>(nm) | $\lambda_{ex}$<br>(nm) | Stokes shift<br>(nm) | $\Phi^a$<br>%   | $\lambda_{abs}$<br>(nm) | $\epsilon$<br>L mol <sup>-1</sup> cm <sup>-1</sup> |
| <b>BBTO-1</b> | CH <sub>2</sub> Cl <sub>2</sub> | 518                    | 469                    | 49                   | 0.05            | 459.5                   | 1146                                               |
|               | DMSO                            | 528                    | 468                    | 60                   |                 |                         |                                                    |
|               | MeOH                            | 514                    | 467                    | 47                   |                 |                         |                                                    |
|               | THF                             | 509                    | 464                    | 45                   |                 |                         |                                                    |
|               | PBS                             | 502                    | 426                    | 76                   |                 |                         |                                                    |
| <b>BBTO-2</b> | CH <sub>2</sub> Cl <sub>2</sub> | 602                    | 557                    | 45                   | 5.71            | 537                     | 61602                                              |
|               | DMSO                            | 620                    | 559                    | 61                   |                 |                         |                                                    |
|               | MeOH                            | 611                    | 566                    | 45                   |                 |                         |                                                    |
|               | THF                             | 588                    | 522                    | 66                   |                 |                         |                                                    |
|               | PBS                             | 627                    | 589                    | 38                   |                 |                         |                                                    |
| <b>BBTO-3</b> | CH <sub>2</sub> Cl <sub>2</sub> | 696                    | 619                    | 77                   | 8.16            | 536                     | 25342                                              |
|               | DMSO                            | 722                    | 617                    | 105                  |                 |                         |                                                    |
|               | MeOH                            | 712                    | 620                    | 92                   |                 |                         |                                                    |
|               | THF                             | 674                    | 584                    | 90                   |                 |                         |                                                    |
|               | PBS                             | 720                    | 646                    | 74                   |                 |                         |                                                    |
|               | With $A\beta$                   | 693                    | 630                    | 63                   |                 |                         |                                                    |
| <b>BBTS-1</b> | CH <sub>2</sub> Cl <sub>2</sub> | 546                    | 500                    | 46                   | 0.79            | 496                     | 80017                                              |
|               | DMSO                            | 554                    | 504                    | 50                   |                 |                         |                                                    |
|               | MeOH                            | 549                    | 494                    | 55                   |                 |                         |                                                    |
|               | THF                             | 535                    | 489                    | 46                   |                 |                         |                                                    |
|               | PBS                             | 502                    | 426                    | 76                   |                 |                         |                                                    |
| <b>BBTS-2</b> | CH <sub>2</sub> Cl <sub>2</sub> | 632                    | 595                    | 37                   | 5.93            | 576.5                   | 107689                                             |
|               | DMSO                            | 651                    | 601                    | 50                   |                 |                         |                                                    |
|               | MeOH                            | 641                    | 599                    | 42                   |                 |                         |                                                    |
|               | THF                             | 617                    | 571                    | 46                   |                 |                         |                                                    |
|               | PBS                             | 649                    | 535                    | 114                  |                 |                         |                                                    |
| <b>BBTS-3</b> | CH <sub>2</sub> Cl <sub>2</sub> | 727                    | 632                    | 95                   | 6.77            | 584                     | 6152                                               |
|               | DMSO                            | 734                    | 620                    | 114                  |                 |                         |                                                    |
|               | MeOH                            | 737                    | 628                    | 109                  |                 |                         |                                                    |
|               | THF                             | 714                    | 618                    | 96                   |                 |                         |                                                    |
|               | PBS                             | 727                    | 648                    | 79                   |                 |                         |                                                    |
|               | With $A\beta$                   | 721                    | 643                    | 78                   |                 |                         |                                                    |

<sup>a</sup> Measured in CH<sub>2</sub>Cl<sub>2</sub>.

## Fluorescence Spectral Measurements of the NIR Probes with A $\beta$ Aggregates and BSA.

NIR probes (50 nM in the final test solution) in 2.9 mL PBS were added to a solution of 100  $\mu$ L of aggregated A $\beta_{1-42}$  and A $\beta_{1-40}$  fibrils or A $\beta_{1-42}$  and A $\beta_{1-40}$  monomers (30  $\mu$ g in the final test solution) or BSA (30  $\mu$ g in the final test solution), then the mixture was incubated at 37  $^{\circ}$ C with constant shaking (120 r/min) for 1 h. The mixture was then transferred to a quartz sampling cell, and the fluorescent properties (fluorescence excitation/emission wavelength and intensity) were measured on a SHIMADZU RF-5301PC spectrofluorophotometer (Japan). The fluorescence properties of the solutions of the NIRFs in PBS (50 nM) were also measured in the same manner as a blank control.

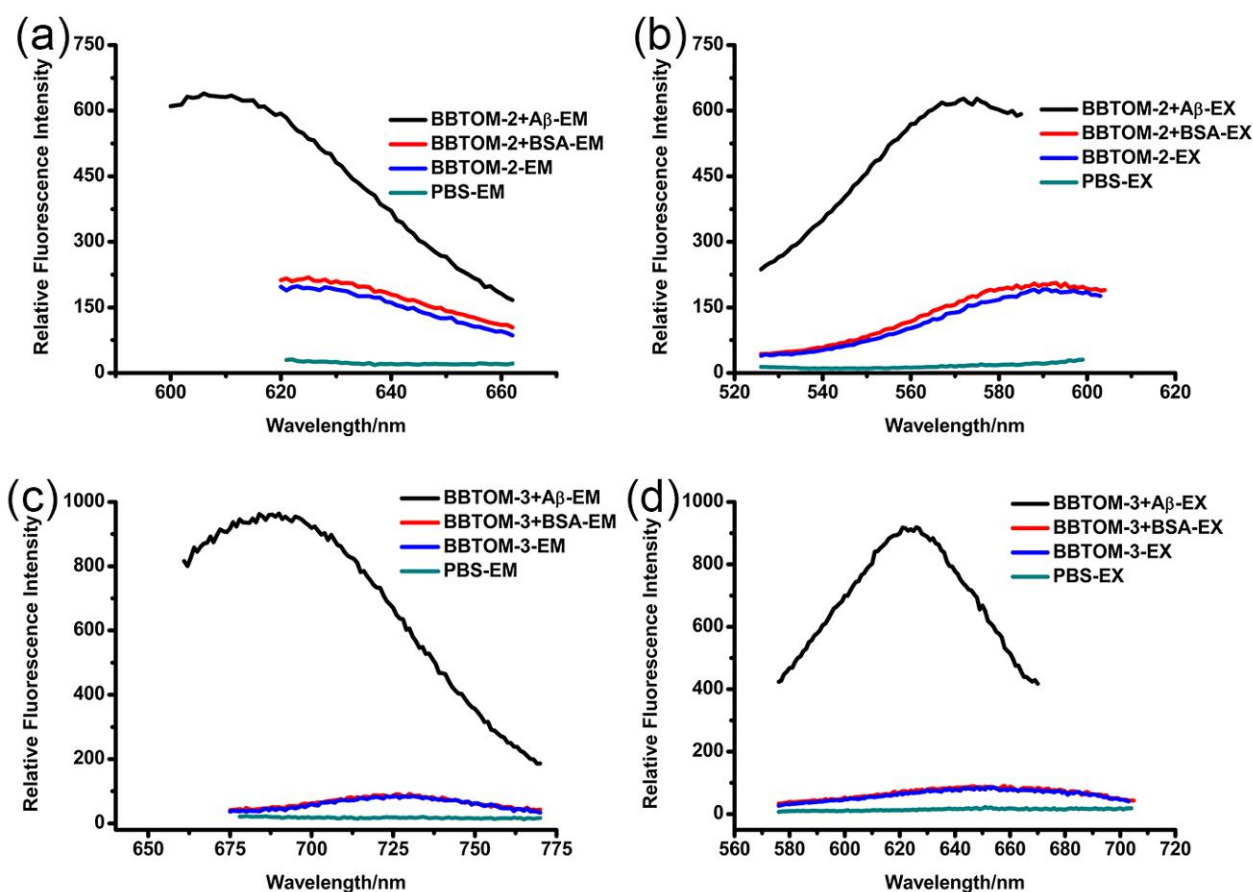

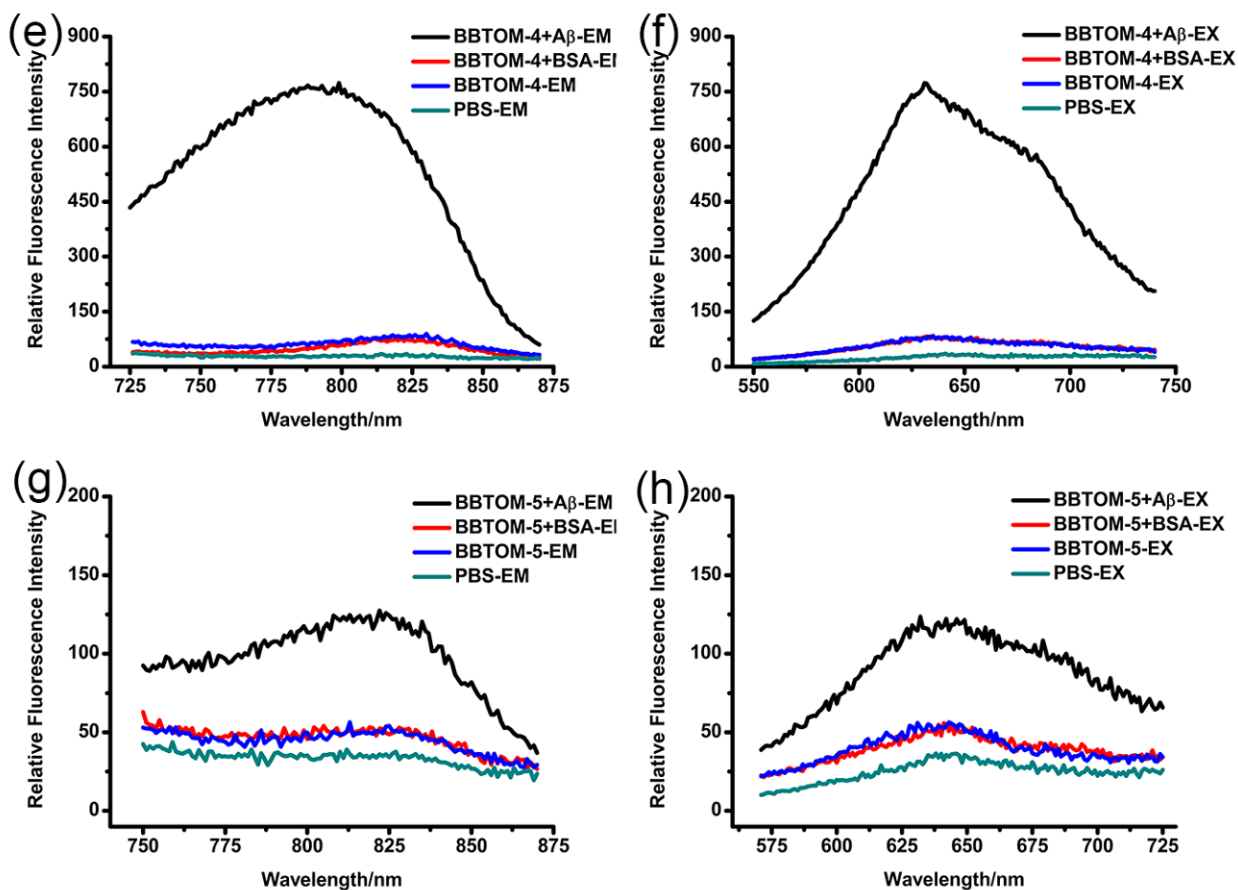

**Figure. S8** The excitation (right panel) and emission (left panel) spectra of BBTOM2-5 upon interaction with  $A\beta_{1-42}$  aggregates and BSA. The spectra of BBTOM2-5 solutions in PBS and PBS alone were also measured in the same condition.

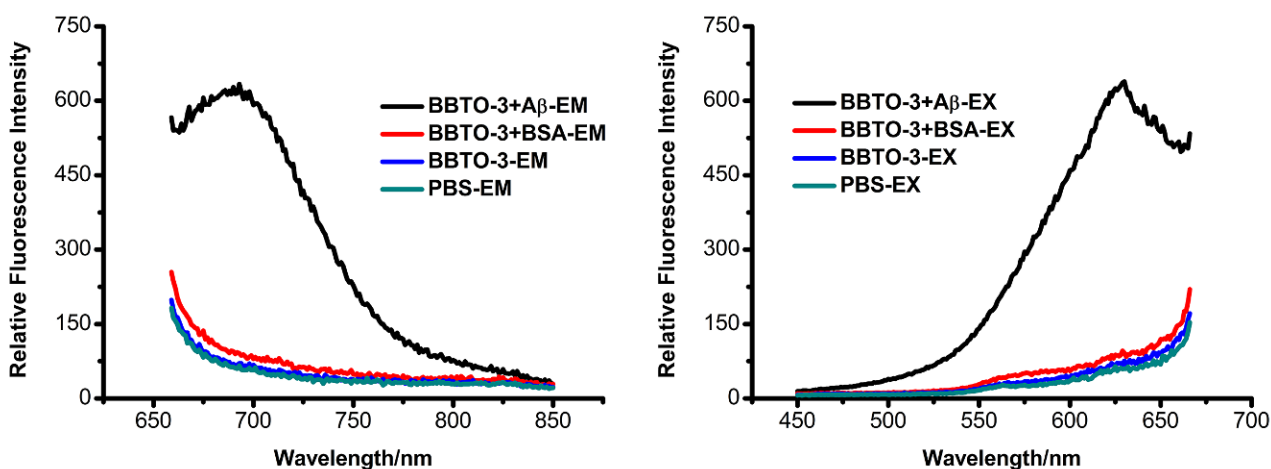

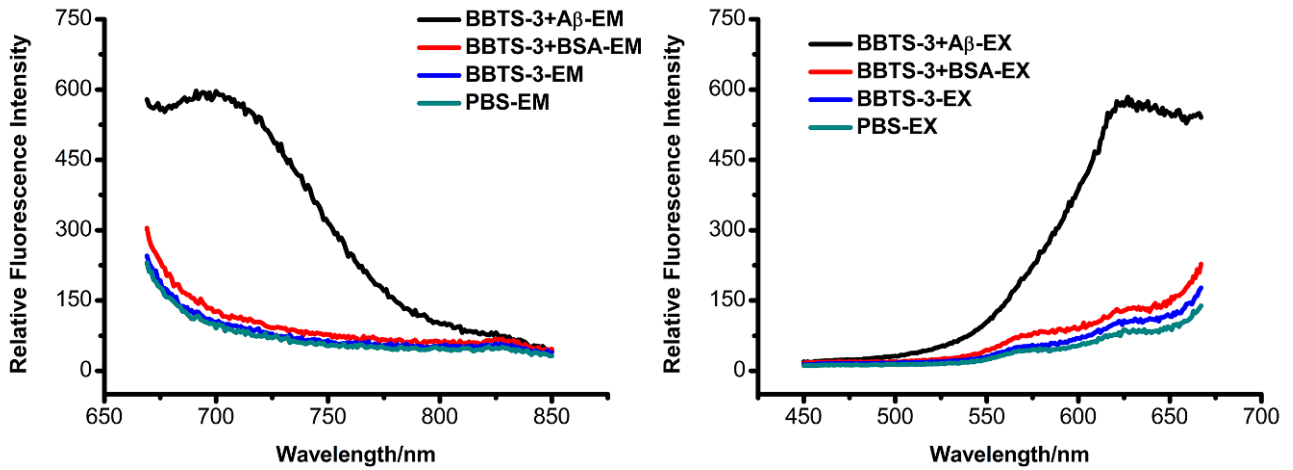

**Figure. S9** The excitation (right panel) and emission (left panel) spectra of BBTO-3 and BBTS-3 upon interaction with  $A\beta_{1-42}$  aggregates and BSA. The spectra of BBTO-3 and BBTS-3 solutions in PBS and PBS alone were also measured in the same condition.

### ***In Vitro* Fluorescent Staining.**

Paraffin-embedded brain sections from Tg mice (C57BL6, APP<sup>swe</sup>/PSEN1, 12-month old, male), wild-type mice (C57BL6, 12-month old, male), AD human (91-year old, male; 64-year old, female, temporal lobe) and healthy human (72-year old, male, temporal lobe) were used for the neuropathological staining. The brain slices were deparaffinized with 10 min washes in xylene, 5 min washes in 100% ethanol, and running double distilled water for 5 min. Next, the brain sections were incubated with aqueous solutions of NIR probes (1.0  $\mu$ M, 5% DMSO, 10% ethanol) for 5 min at room temperature. The localization of plaques was confirmed by staining the adjacent sections with Th-S (0.125% in water). Fluorescent observation was carried out on an Axio Observer Z1 (Zeiss, Germany) equipped with DAPI, AF488, AF546, and Cy5 filter sets.



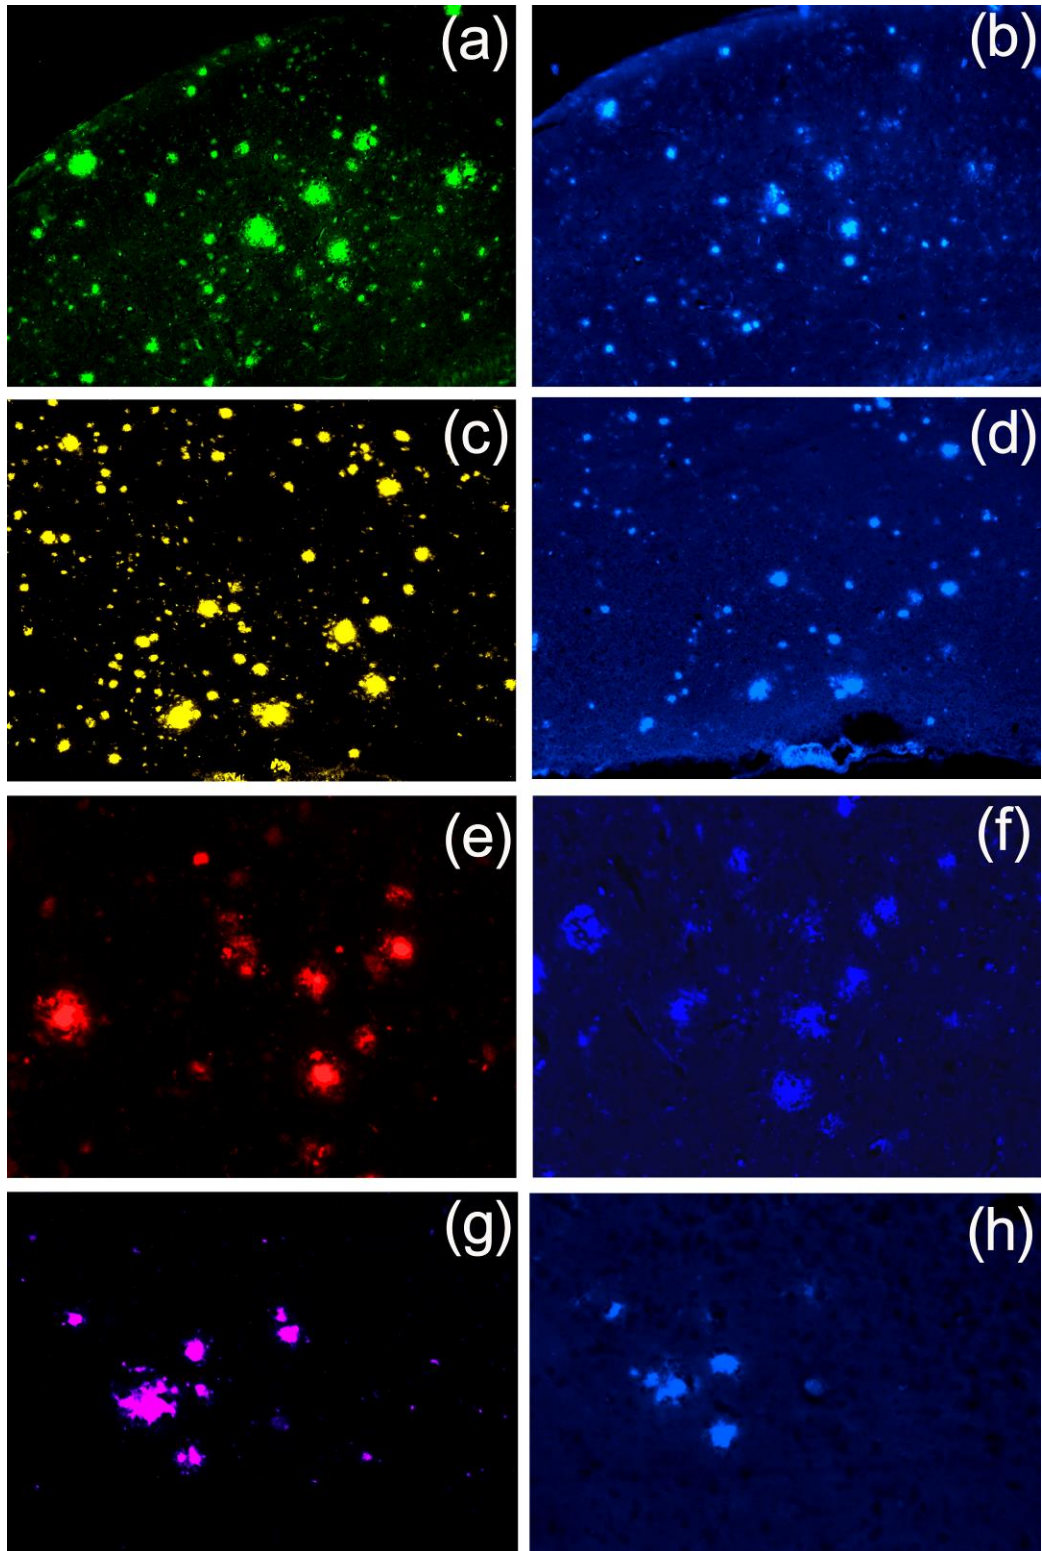

**Figure. S10** *In vitro* fluorescent staining of A $\beta$  plaques on brain sections of Tg mice by BBTOMs. (a, 10 $\times$ ), (c, 10 $\times$ ), (e, 10 $\times$ ) and (g, 20 $\times$ ) were stained by BBTOM-1, -2, -4, and BBTOM-5, respectively. The presence and distribution of plaques on the sections were confirmed by fluorescence staining

using Th-S on the adjacent section (b, 10×), (d, 10×), (f, 10×) and (h, 20×).

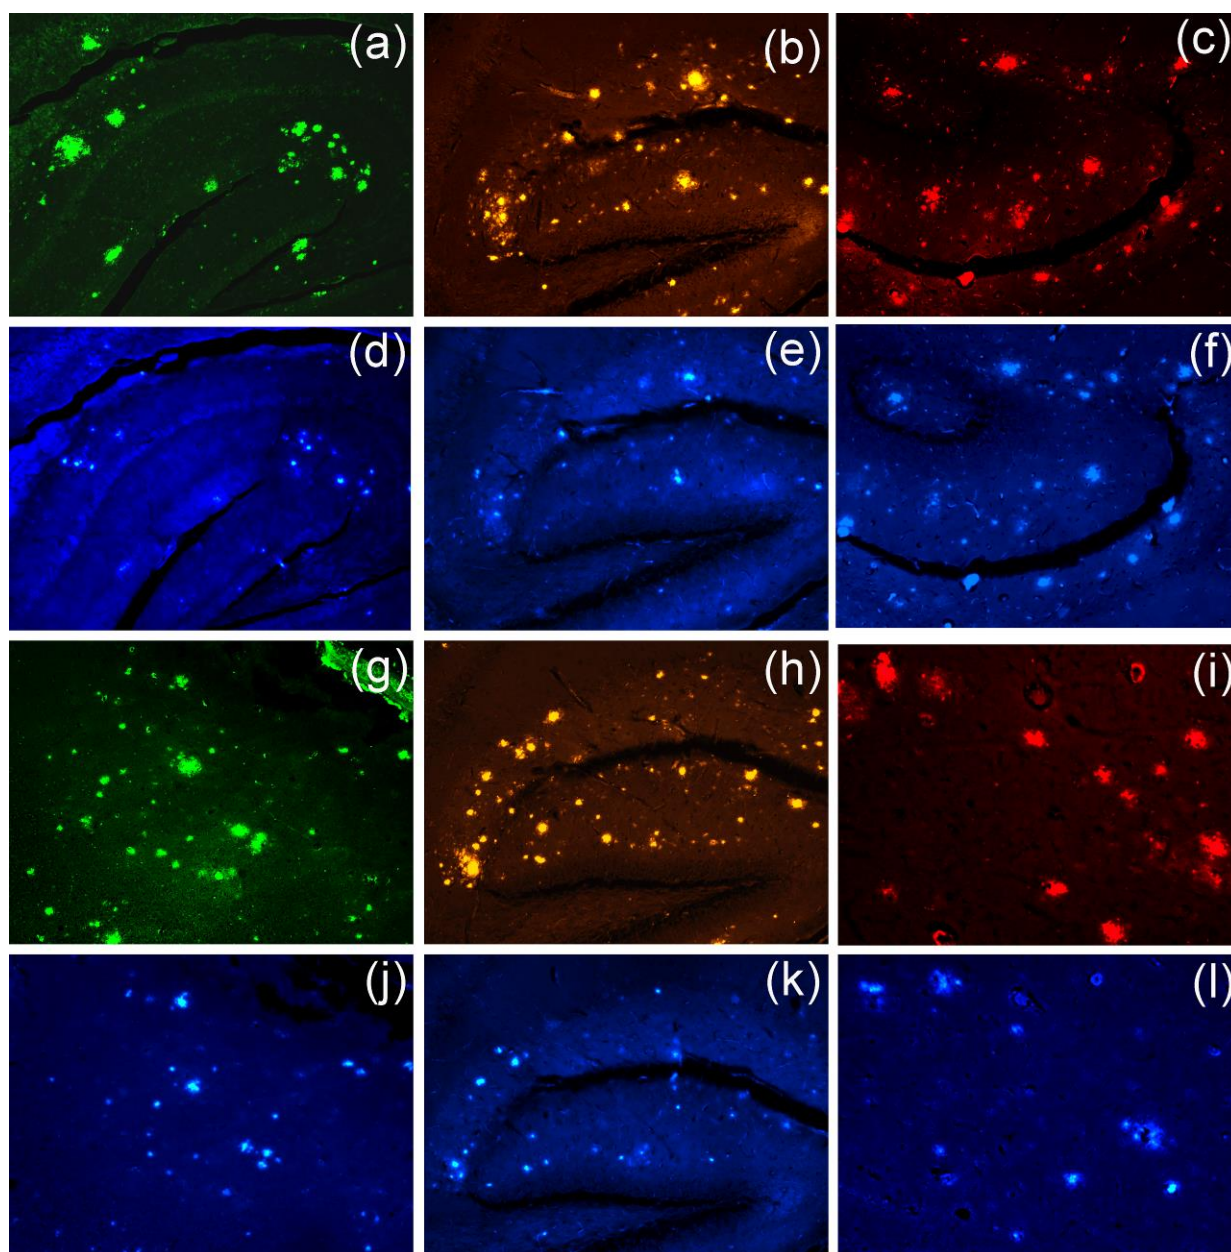

**Figure. S11** *In vitro* fluorescent staining of  $A\beta$  plaques on brain sections of Tg mice by BBTO1-3 and BBTS1-3. (a, 10×), (b, 10×), (c, 10×), (g, 10×), (h, 10×) and (i, 20×) were stained by BBTO-1, -2, -3, and BBTS-1, -2, -3, respectively. The presence and distribution of plaques on the sections were confirmed by fluorescence staining using Th-S on the adjacent section (d, 10×), (e, 10×), (f, 10×), (j, 10×), (k, 10×) and (l, 20×).

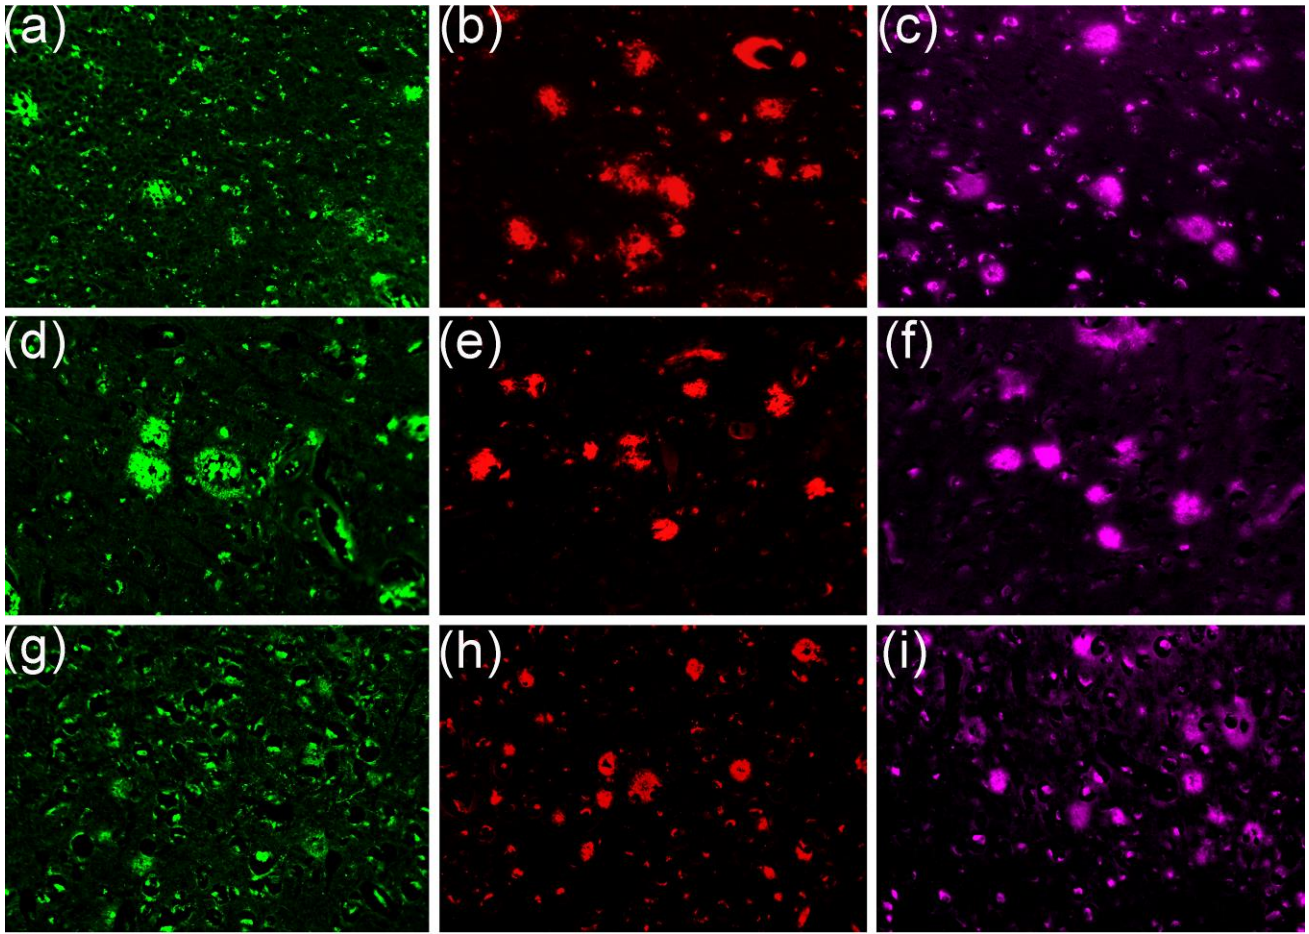

**Figure. S12** *In vitro* fluorescent staining of  $A\beta$  plaques on brain sections of AD patients. (a), (b) and (c) were stained by BBTOM-1, -2, -4, respectively; (d), (e) and (f) were stained by BBTO-1, -2, -3, respectively. (g), (h) and (i) were stained by BBTS-1, -2, -3, respectively. Magnification: 20 $\times$

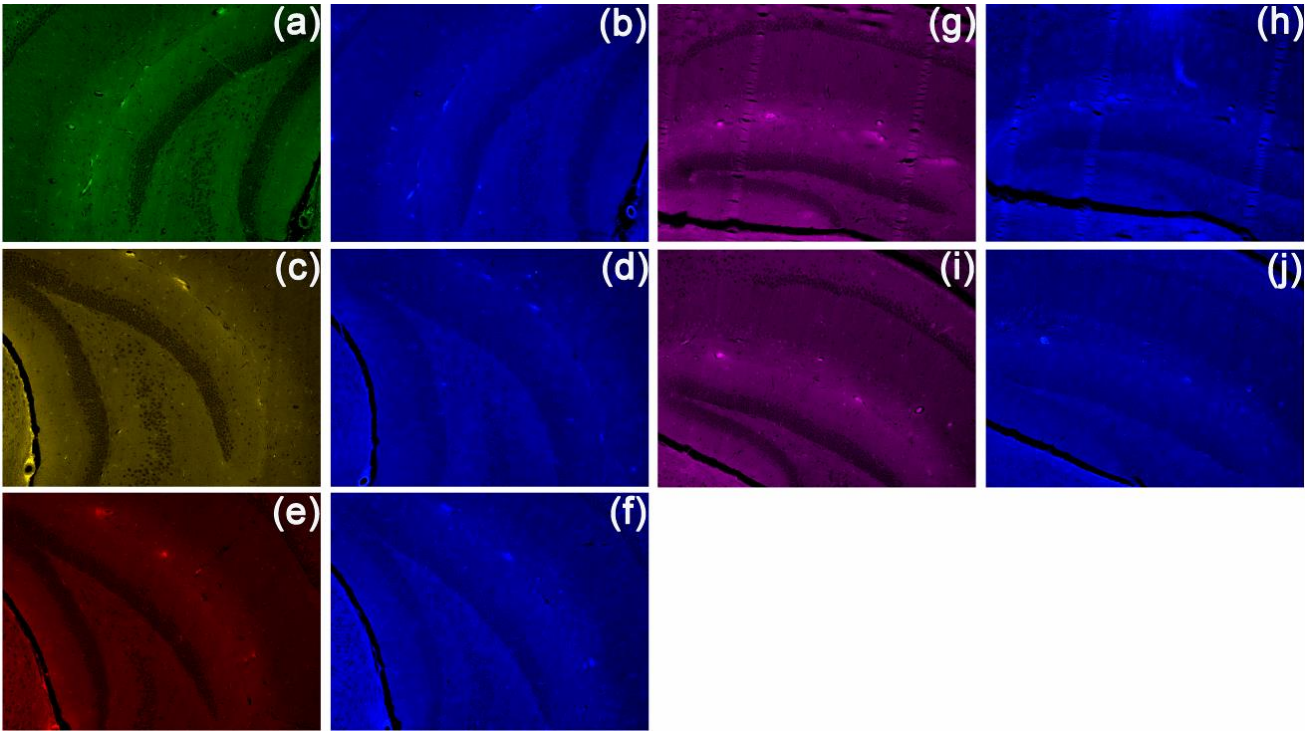

**Figure. S13** *In vitro* fluorescent staining on brain sections from wild-type mouse. (a), (c), (e), (g) and (i) were stained by BBTOM-1, -2, -3, -4, and -5, respectively. The adjacent brain sections were stained with Th-S (b), (d), (f), (h) and (j). Magnification: 10 $\times$

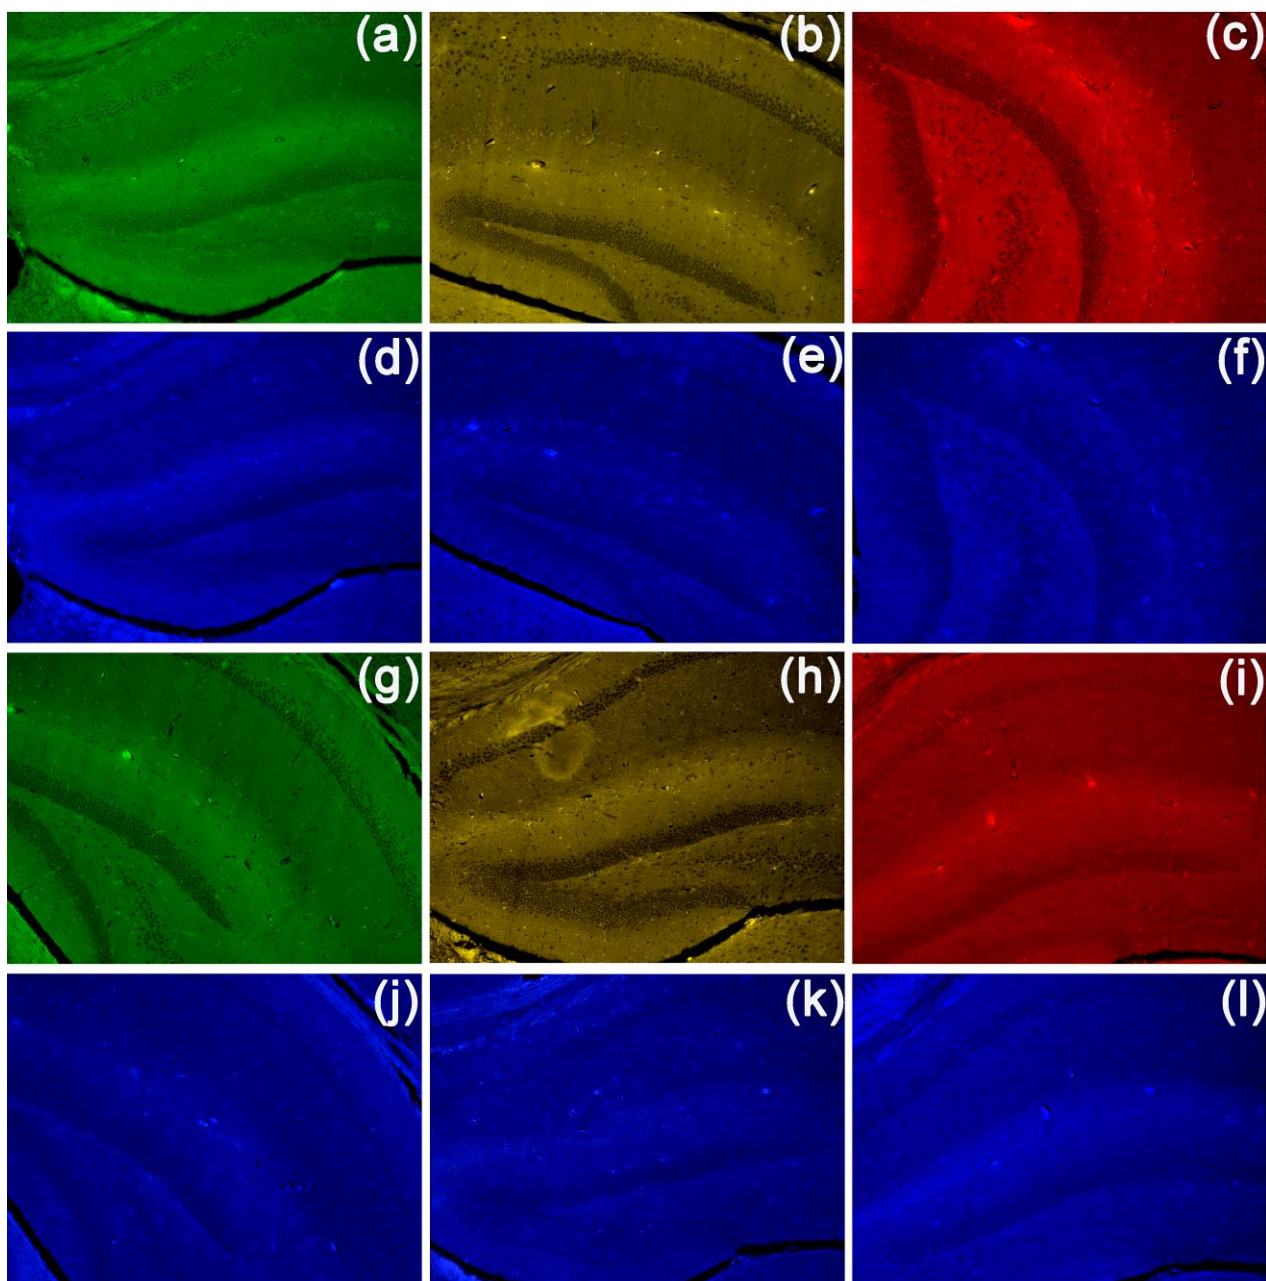

**Figure. S14** *In vitro* fluorescent staining on brain sections from wild-type mouse. (a), (b) and (c) were stained by BBTO-1, -2 and -3, respectively. (g), (h) and (i) were stained by BBTS-1, -2, -3, respectively. The adjacent brain sections were stained with Th-S (d), (e), (f), (j), (k) and (l). Magnification: 10 $\times$ .

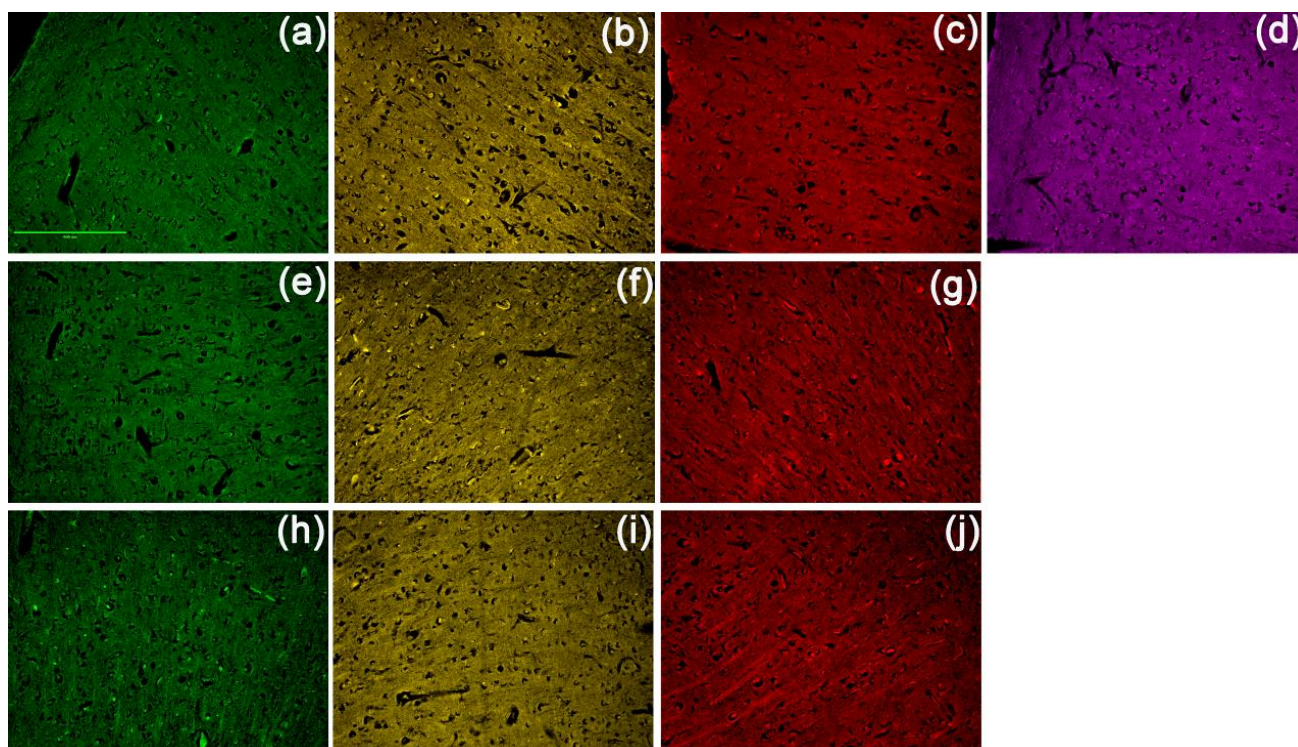

**Figure. S15** *In vitro* fluorescent staining on brain sections from healthy human (72-year old, male, temporal lobe). (a), (b), (c) and (d) were stained by BBTOM-1, -2, -3 and -4, respectively. (e), (f) and (g) were stained by BBTO-1, -2, -3, respectively. (h), (i) and (j) were stained by BBTS-1, -2, -3, respectively. Magnification: 10 $\times$ .

#### ***In vitro* Inhibition Binding Assays Using A $\beta$ <sub>1-42</sub> Aggregates.**

[<sup>125</sup>I]IMPY was employed as radioligand to determine the binding affinities of the NIR probes in *in vitro* competitive binding assays. [<sup>125</sup>I]IMPY and A $\beta$ <sub>1-42</sub> aggregates were prepared according to procedures described previously.<sup>4</sup> Inhibition experiments were manipulated in 12  $\times$  75 mm borosilicate glass tubes, 100  $\mu$ L of aggregated A $\beta$  fibrils (60 nM in the final assay mixture) was added to a mixture containing 100  $\mu$ L of [<sup>125</sup>I]IMPY at appropriate concentration, 100  $\mu$ L of probes (10<sup>-5</sup> to 10<sup>-10</sup> M in ethanol), and 700  $\mu$ L of PBS (0.2 M, pH = 7.4, containing 0.1 % BSA) in a final volume of 1 mL. The mixture was incubated at 37  $^{\circ}$ C for 2 h, then it was transferred to borosilicate

glass microfiber filters (Whatman, GF/B) using a Brandel Mp-48T cell harvester. After the bound and free [<sup>125</sup>I]IMPY were separated, filters containing the bound [<sup>125</sup>I]IMPY were measured by gamma counter (WALLAC/Wizard 1470, USA) with 70% counting efficiency. The half maximal inhibitory concentration (IC<sub>50</sub>) was determined from the displacement curves of three independent assays using GraphPad Prism 4.0 and the inhibition constant (K<sub>i</sub>) was calculated using the Cheng-Prusoff equation:  $K_i = IC_{50}/(1 + [L]/K_d)$ .<sup>5</sup>

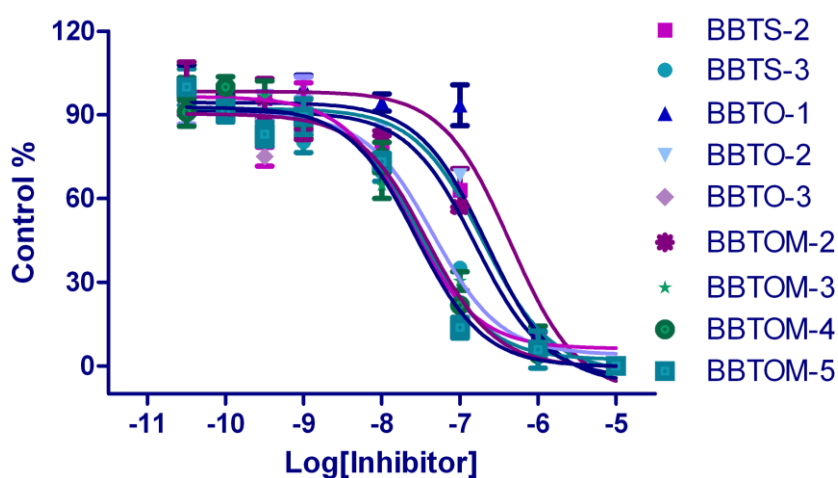

**Figure. S16** Inhibition curves for the binding of [<sup>125</sup>I]IMPY to A $\beta$ <sub>1-42</sub> aggregates.

### Blood-Brain Barrier (BBB) Penetrating studies of BBTOM-3.

A solution of BBTOM-3 (20% DMSO and 80% propylene glycol, 50  $\mu$ L, 2 mg/Kg) was injected via tail vein of ICR mice (20-22 g, male). Next, the mice were sacrificed at proper time points of 2, 10, 30 and 60 min (n = 3 for each time point), and the brain samples were dissected out to homogenize with 1 mL acetonitrile for twice. Then, the extracts were filtered by flashing nylon membrane (0.22  $\mu$ m) and dried over anhydrous sodium sulfate and washed by 1 mL acetonitril. After that, 100  $\mu$ L of the combined acetonitrile were analyzed by Agilent 1260 Infinity Quaternary LC (Agilent

Technologies) system, HPLC conditions: Venusil MP C18 column (Agela Technologies, 5  $\mu\text{m}$ , 4.6 mm  $\times$  250 mm),  $\text{CH}_3\text{CN}/\text{H}_2\text{O} = 80\%/20\%$ , 1 mL/min. The blank control was obtained by analyzing the solution of the probe (10  $\mu\text{L}$  diluted to 3.0 mL acetonitrile).

### ***In Vivo Near-Infrared Imaging.***

Double Tg mice (n = 3, C57BL6, APPsw/PSEN1, 14 month-old, male) and an age-matched control mice (n = 3, C57BL6, 14-month-old, male) were shaved before background imaging and were intravenous injected with BBTOM-3 (0.5 mg/kg, 15% DMSO, 15% tween-80, 70% saline, 50  $\mu\text{L}$ ). The fluorescence signals of the brain are recorded at different time points after intravenous injected with BBTOM-3 on an IVIS Lumina III system. A filter set (ex. at 560 nm and em. at 710 nm) was used for the measurement. The mice were kept on the imaging stage under anesthesia with 2.5% isoflurane gas in an oxygen flow (0.8 L/min) during the imaging process. Living Image Software was employed to analyze the imaging data, and an ROI was drawn around the brain section. Intensity of brain fluorescence was calculated from the radiant efficiency. The data were analyzed according to the procedures described previously.<sup>6</sup>

### ***Ex Vivo Fluorescent Staining of BBTOM-3 to A $\beta$ Plaques in the Brain of Transgenic Mouse.***

BBTOM-3 (1 mg/kg, 20% DMSO, 80% propylene glycol, 50  $\mu\text{L}$ ) was intravenous injected to a double Tg mouse (C57BL6, APPsw/PSEN1, 14-month-old, male) and an age-matched control mouse (C57BL6, 14-month-old, male). Next, they were sacrificed at 20 min after injection. The brains were



excised, embedded in optimum cutting temperature compound (OCT). Frozen sections of 20  $\mu\text{m}$  were cut, and fluorescent observation was performed by Axio Observer Z1 (Zeiss, Germany) equipped with an AF488 filter sets. Furthermore, the  $A\beta$  plaques were further confirmed by the staining of the same section with Th-S (0.125%) using a DAPI filter set.

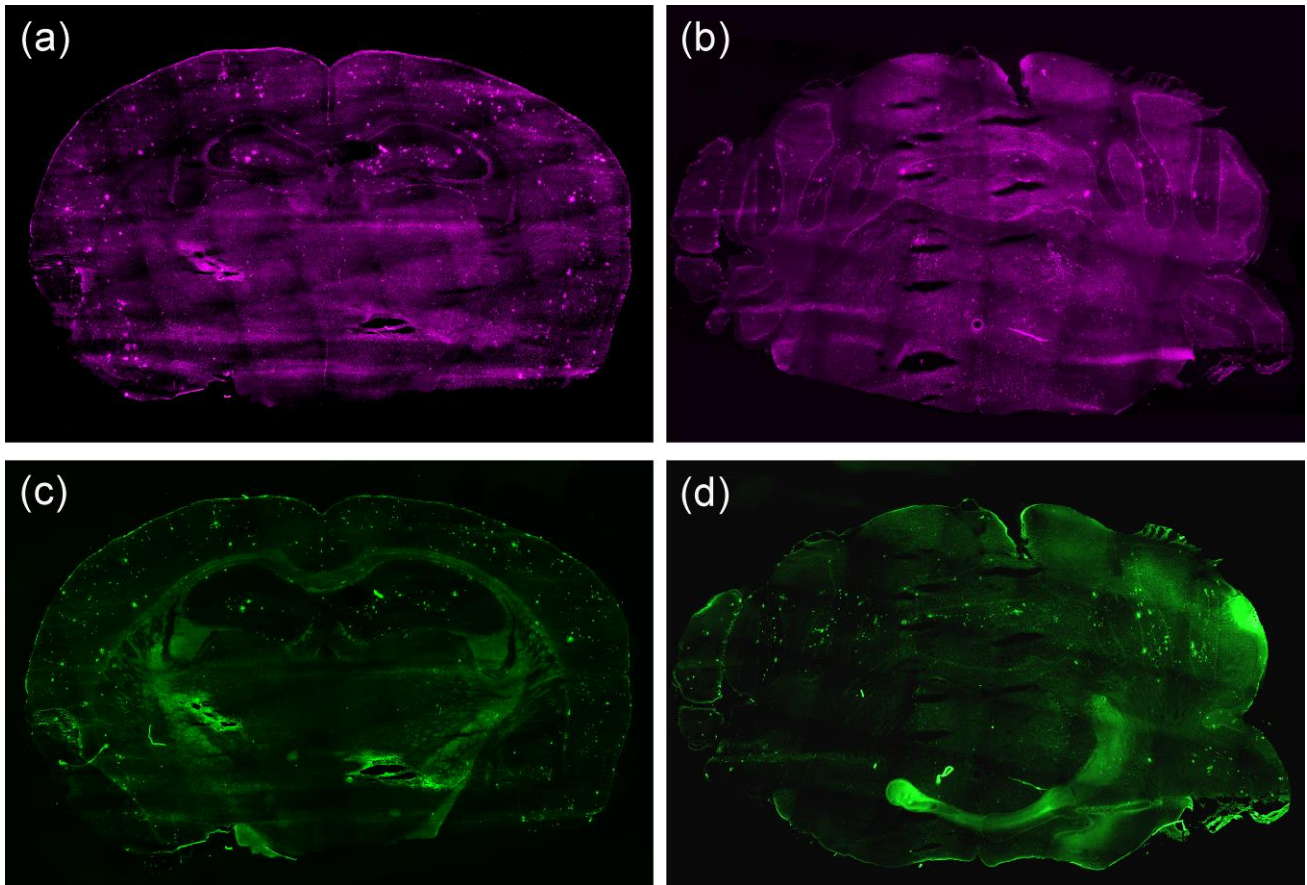

**Figure. S17** *Ex vivo* fluorescence observation of coronal brain slices from a Tg mouse (a: cerebrum region; b: cerebellum region) after injection of BBTOM-3 (1 mg/kg). The  $A\beta$  plaques were further confirmed by staining the same sections with Th-S (c and d).

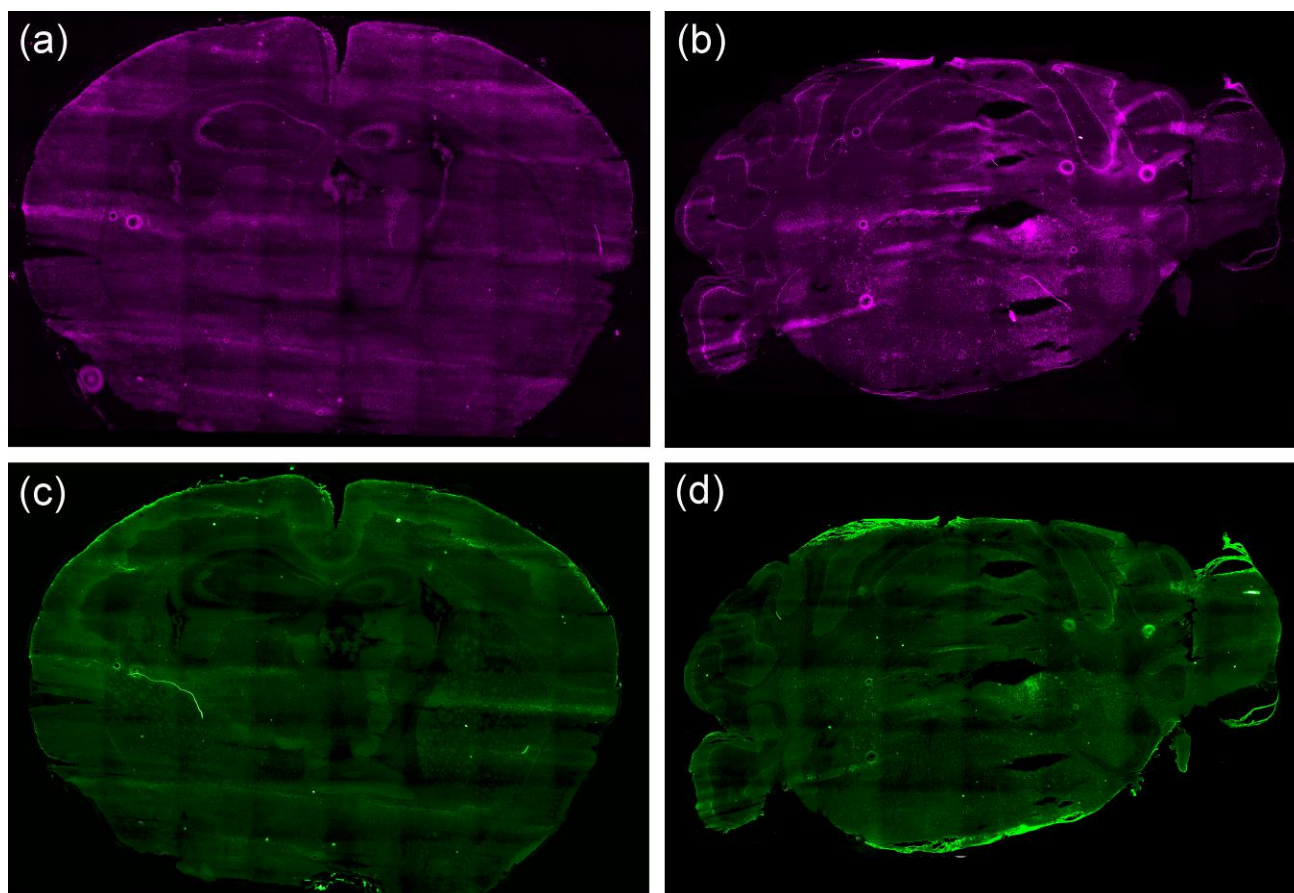

**Figure. S18** *Ex vivo* fluorescence observation of coronal brain slices from a wild-type mouse (a: cerebrum region; b: cerebellum region) after injection of BBTOM-3 (1 mg/kg). The A $\beta$  plaques were further confirmed by staining the same sections with Th-S (c and d).

### **Photo-isomerization.**

BBTOM-3 was dissolved in acetonitrile and was irradiated under UV light (365 nm) for 1 hour, then the samples were analyzed by HPLC to verify the retention time and purity with or without irradiation. As shown in Fig S19, there was no retention time and purity change of BBTOM-3 after UV irradiation, which indicated that BBTOM-3 was stable towards photochemical isomerization.

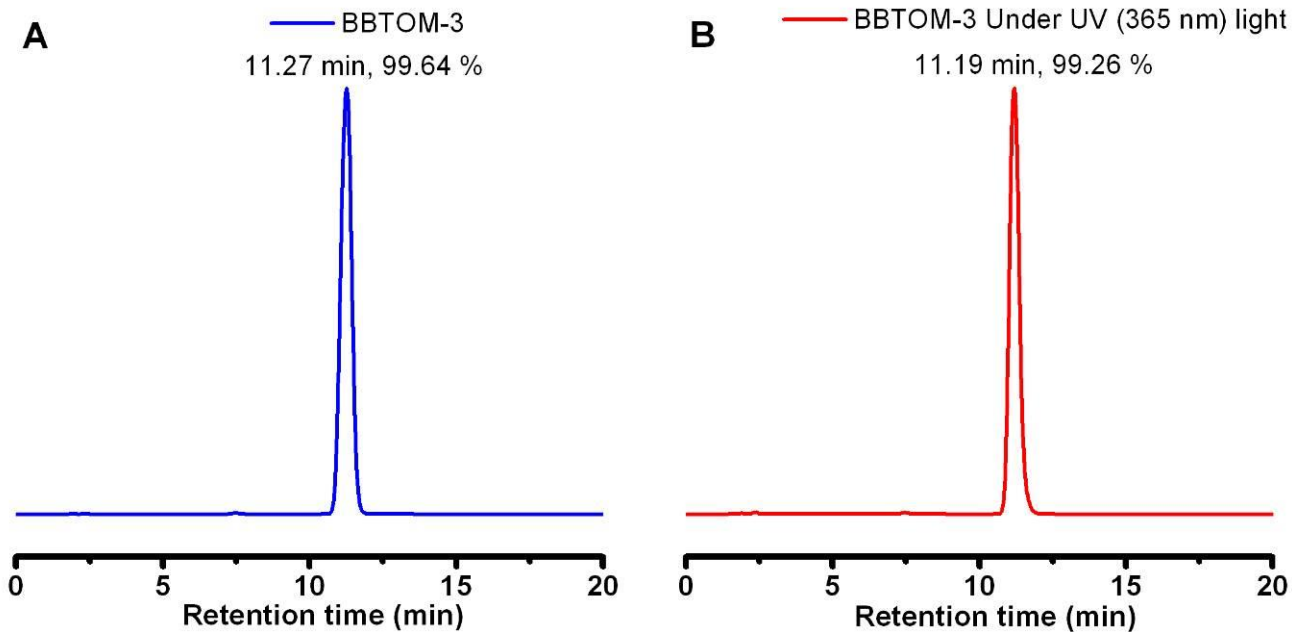

**Figure. S19** HPLC profiles of BBTOM-3 (A) and BBTOM-3 under 1 hour of UV light (365 nm) irradiation (B).

**NMR and MS Spectra of All Compounds.**

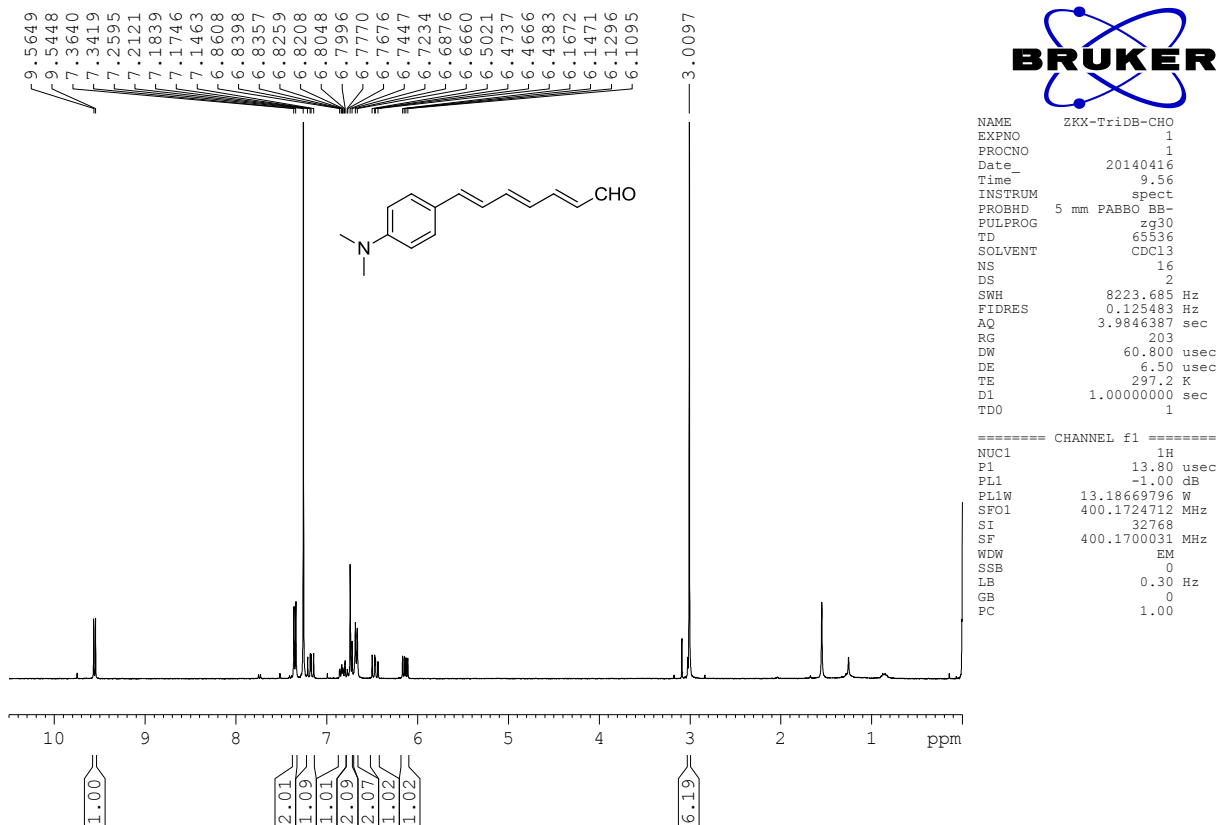

<sup>1</sup>H NMR (CDCl<sub>3</sub>) spectrum of compound **2**

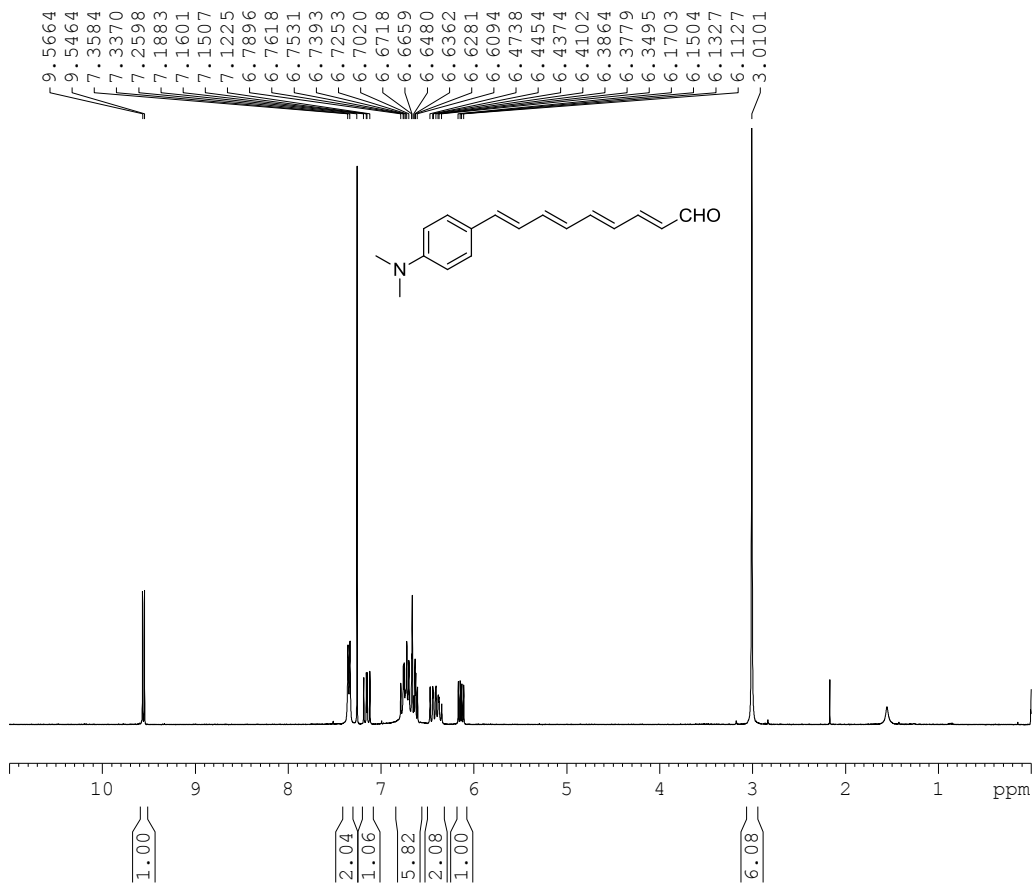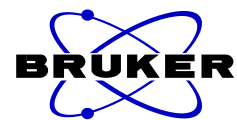

```

NAME      ZKX-PH-4-CHO-20150527
EXPNO    1
PROCNO   1
Date_    20150527
Time     21.13
INSTRUM  spect
PROBHD   5 mm PABBO BB-
PULPROG  zg30
TD       65536
SOLVENT  CDCl3
NS       16
DS       2
SWH      8223.685 Hz
FIDRES   0.125483 Hz
AQ       3.9846387 sec
RG       203
DW       60.800 usec
DE       6.50 usec
TE       297.2 K
D1       1.00000000 sec
TD0      1

===== CHANNEL f1 =====
NUC1     1H
P1       13.80 usec
PL1     -1.00 dB
PL1W    13.18669796 W
SFO1    400.1724712 MHz
SI       32768
SF       400.1700034 MHz
WDW      EM
SSB      0
LB       0.30 Hz
GB       0
PC       1.00
  
```

<sup>1</sup>H NMR (CDCl<sub>3</sub>) spectrum of compound 3

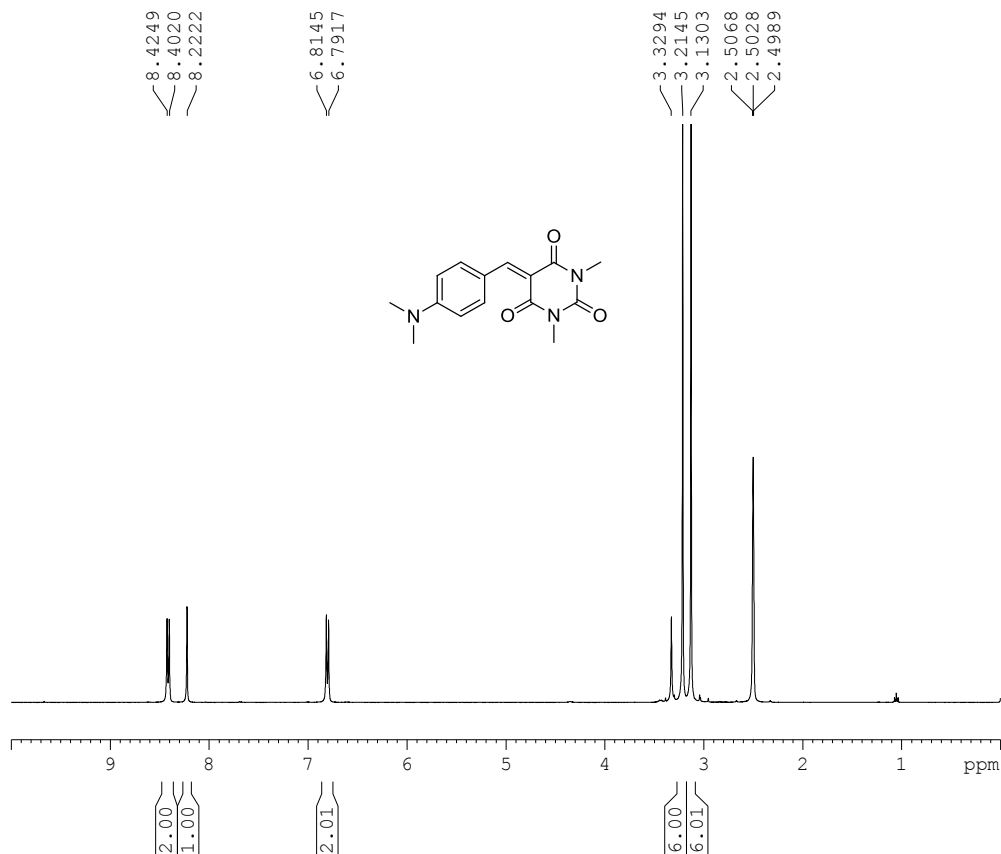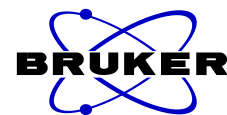

```

NAME      BBATO-M-1
EXPNO    1
PROCNO   1
Date_    20111025
Time     9.33
INSTRUM  spect
PROBHD   5 mm PABBO BB-
PULPROG  zg30
TD       65536
SOLVENT  DMSO
NS       16
DS       2
SWH      8223.685 Hz
FIDRES   0.125483 Hz
AQ       3.9846387 sec
RG       203
DW       60.800 usec
DE       6.50 usec
TE       295.4 K
D1       1.00000000 sec
TD0      1

===== CHANNEL f1 =====
NUC1     1H
P1       13.80 usec
PL1     -1.00 dB
PL1W    13.18669796 W
SFO1    400.1724712 MHz
SI       32768
SF       400.1699942 MHz
WDW      EM
SSB      0
LB       0.30 Hz
GB       0
PC       1.00
  
```

<sup>1</sup>H NMR (DMSO-d<sub>6</sub>) spectrum of BBTOM-1

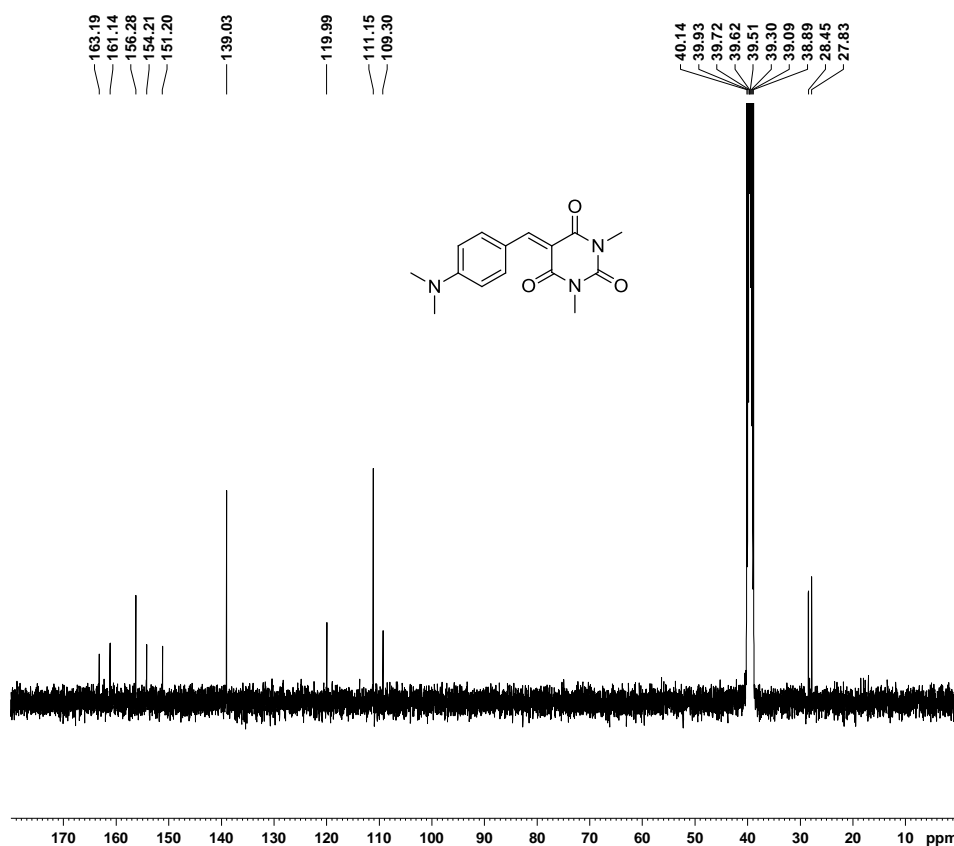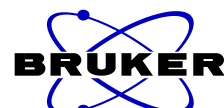

```

NAME      BBATO-M-1-C13
EXPNO     1
PROCNO    1
Date_     20111026
Time      14.03
INSTRUM   spect
PROBHD    5 mm PABBO BB-
PULPROG   zgpg30
TD        65536
SOLVENT   DMSO
NS        3080
DS        4
SWH       24038.461 Hz
FIDRES    0.366798 Hz
AQ        1.3631988 sec
RG        203
DW        20.800 usec
DE        6.50 usec
TE        298.7 K
D1        2.00000000 sec
D11       0.03000000 sec
TD0       1
    
```

```

===== CHANNEL f1 =====
NUC1      13C
P1        8.50 usec
PL1       -2.00 dB
PL1W      57.32743073 W
SFO1      100.6328888 MHz

===== CHANNEL f2 =====
CPDPRG2   waltz16
NUC2      1H
PCPD2     80.00 usec
PL2       -1.00 dB
PL12      14.26 dB
PL13      14.46 dB
PL2W      13.18669796 W
PL12W     0.39276794 W
PL13W     0.37509048 W
SFO2      400.1716007 MHz
SI        32768
SF        100.6228773 MHz
WDW       EM
SSB       0
LB        1.00 Hz
GB        0
PC        1.40
    
```

<sup>13</sup>C NMR (DMSO-d<sub>6</sub>) spectrum of BBTOM-1

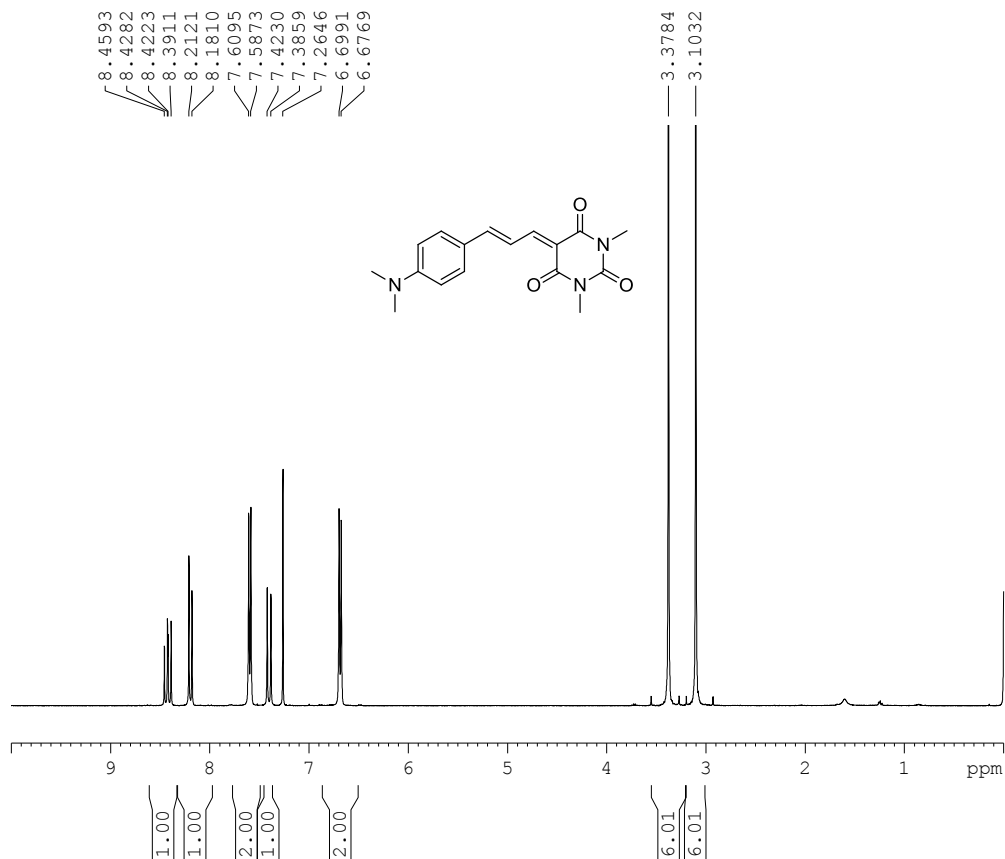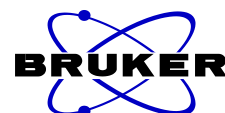

```

NAME      BBATO-M-2
EXPNO     1
PROCNO    1
Date_     20111025
Time      9.29
INSTRUM   spect
PROBHD    5 mm PABBO BB-
PULPROG   zg30
TD        65536
SOLVENT   CDCl3
NS        16
DS        2
SWH       8223.685 Hz
FIDRES    0.125483 Hz
AQ        3.9846387 sec
RG        203
DW        60.800 usec
DE        6.50 usec
TE        295.5 K
D1        1.00000000 sec
TD0       1
    
```

```

===== CHANNEL f1 =====
NUC1      1H
P1        13.80 usec
PL1       -1.00 dB
PL1W      13.18669796 W
SFO1      400.1724712 MHz
SI        32768
SF        400.1700017 MHz
WDW       EM
SSB       0
LB        0.30 Hz
GB        0
PC        1.00
    
```

<sup>1</sup>H NMR (CDCl<sub>3</sub>) spectrum of BBTOM-2

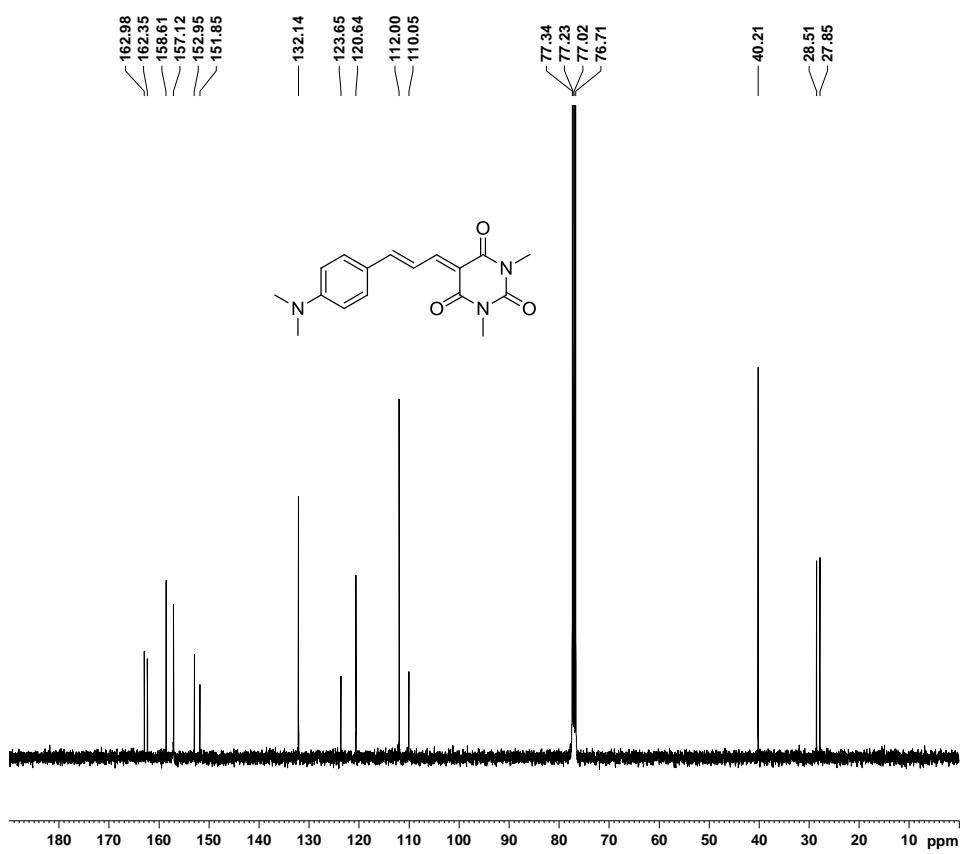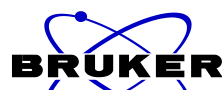

```

NAME      BBATO-M-2-Cl3
EXPNO    1
PROCNO   1
Date_    20111025
Time     22.27
INSTRUM  spect
PROBHD   5 mm PABBO BB-
FULPROG  zgpg30
TD       65536
SOLVENT  CDCl3
NS       2000
DS       4
SWH      24038.461 Hz
FIDRES   0.366798 Hz
AQ       1.3631988 sec
RG       203
DW       20.800 usec
DE       6.50 usec
TE       300.0 K
D1       2.00000000 sec
D11      0.03000000 sec
TD0      1

===== CHANNEL f1 =====
NUC1     13C
P1       8.50 usec
PL1     -2.00 dB
PL1W    57.32743073 W
SF01    100.6328888 MHz

===== CHANNEL f2 =====
CPDPRG2  waltz16
NUC2     1H
PCPD2    80.00 usec
PL2     -1.00 dB
PL12    14.26 dB
PL13    14.46 dB
PL1W    13.18669796 W
PL2W    0.39276794 W
PL12W   0.37509048 W
SF02    400.1716007 MHz
SI       32768
SF       100.6228252 MHz
WDW      EM
SSB      0
LB       1.00 Hz
GB       0
PC       1.40
    
```

<sup>13</sup>C NMR (CDCl<sub>3</sub>) spectrum of BBTOM-2

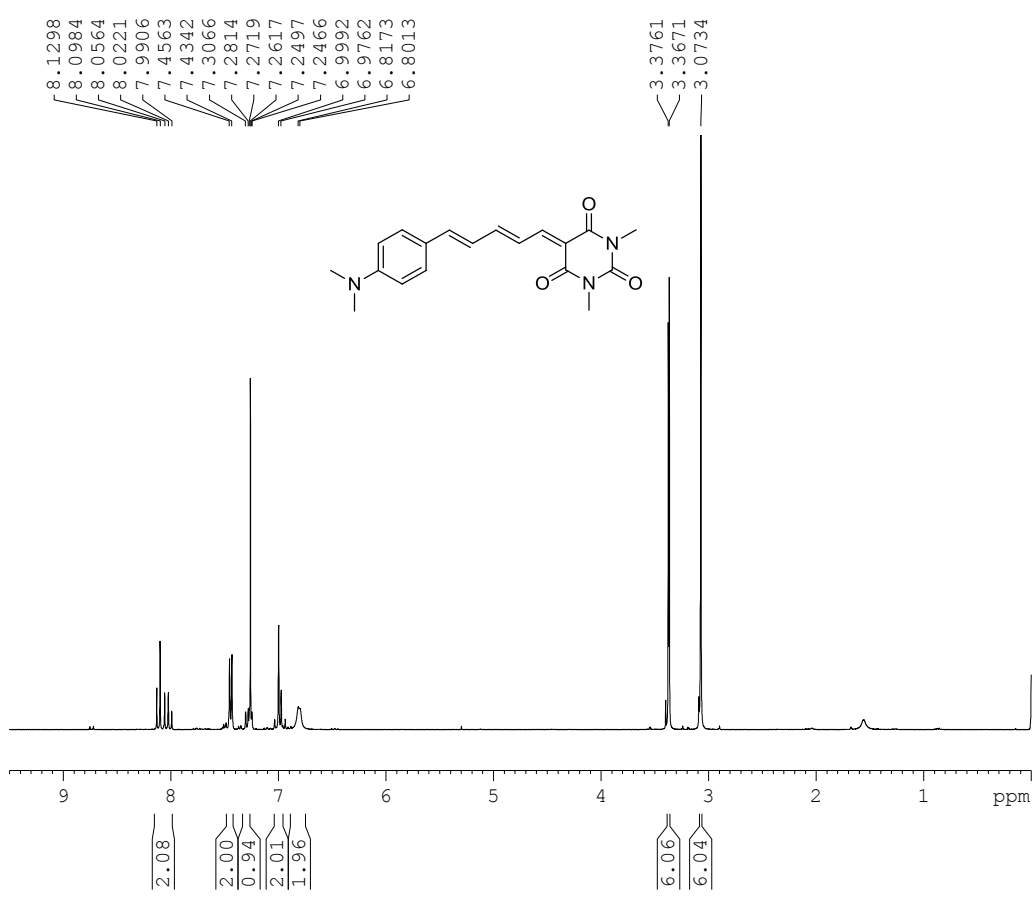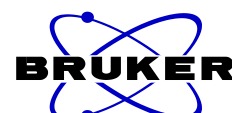

```

NAME      ZKX-BBTOM-3-20150527
EXPNO    1
PROCNO   1
Date_    20150527
Time     9.37
INSTRUM  spect
PROBHD   5 mm PABBO BB-
FULPROG  zg30
TD       65536
SOLVENT  CDCl3
NS       16
DS       2
SWH      8223.685 Hz
FIDRES   0.125483 Hz
AQ       3.9846387 sec
RG       203
DW       60.800 usec
DE       6.50 usec
TE       297.2 K
D1       1.00000000 sec
TD0      1

===== CHANNEL f1 =====
NUC1     1H
P1       13.80 usec
PL1     -1.00 dB
PL1W    13.18669796 W
SF01    400.1724712 MHz
SI       32768
SF       400.1700026 MHz
WDW      EM
SSB      0
LB       0.30 Hz
GB       0
PC       1.00
    
```

<sup>1</sup>H NMR (CDCl<sub>3</sub>) spectrum of BBTOM-3

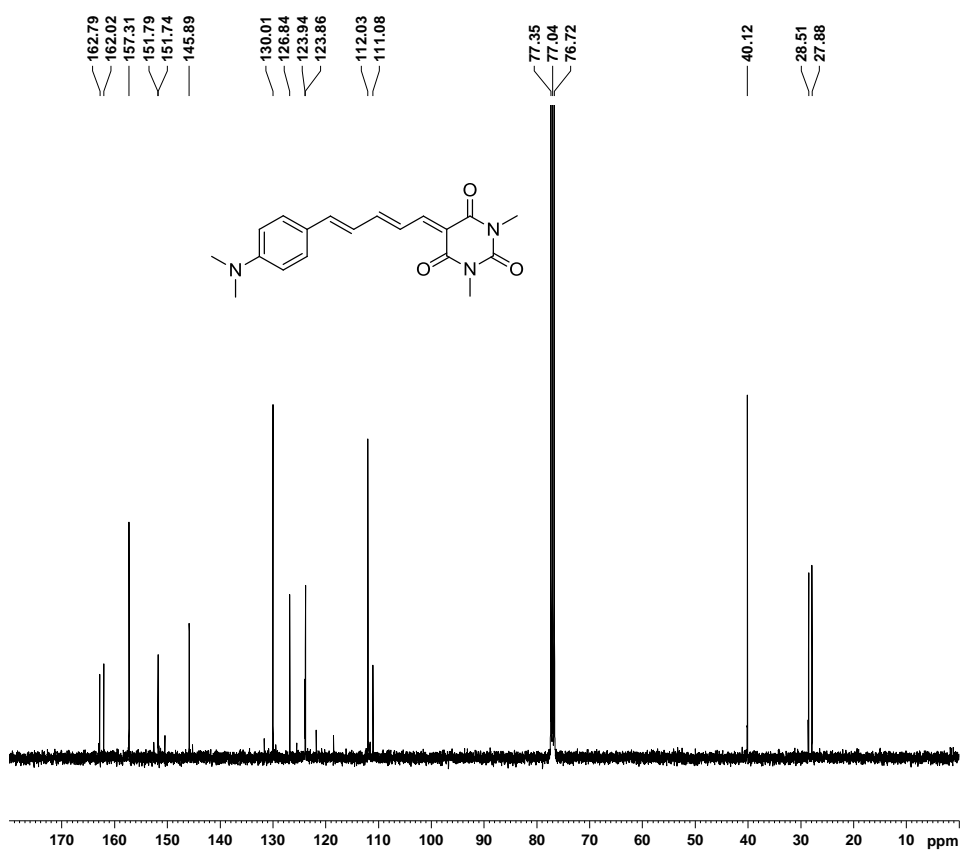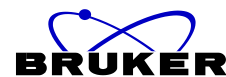

```

NAME      ZKX-BBATO-M-3-C
EXPNO    1
PROCNO   1
Date_    20140429
Time     20.34
INSTRUM  spect
PROBHD   5 mm PABBO BB-
PULPROG  zgpg30
TD       65536
SOLVENT  CDCl3
NS       618
DS       4
SWH      24038.461 Hz
FIDRES   0.366798 Hz
AQ       1.3631988 sec
RG       203
DW       20.800 usec
DE       6.50 usec
TE       301.0 K
D1       2.00000000 sec
D11      0.03000000 sec
TD0     1
    
```

```

===== CHANNEL f1 =====
NUC1     13C
P1       8.50 usec
PL1      -2.00 dB
PL1W     57.32743073 W
SFO1     100.6328888 MHz

===== CHANNEL f2 =====
CPDPRG2  waltz16
NUC2     1H
PCPD2    80.00 usec
PL2      -1.00 dB
PL12     14.26 dB
PL13     14.46 dB
PL2W     13.18669796 W
PL12W    0.39276794 W
PL13W    0.37509048 W
SFO2     400.1716007 MHz
SI       32768
SF       100.6228244 MHz
WDW      EM
SSB      0
LB       1.00 Hz
GB       0
PC       1.40
    
```

<sup>13</sup>C NMR (CDCl<sub>3</sub>) spectrum of BBTOM-3

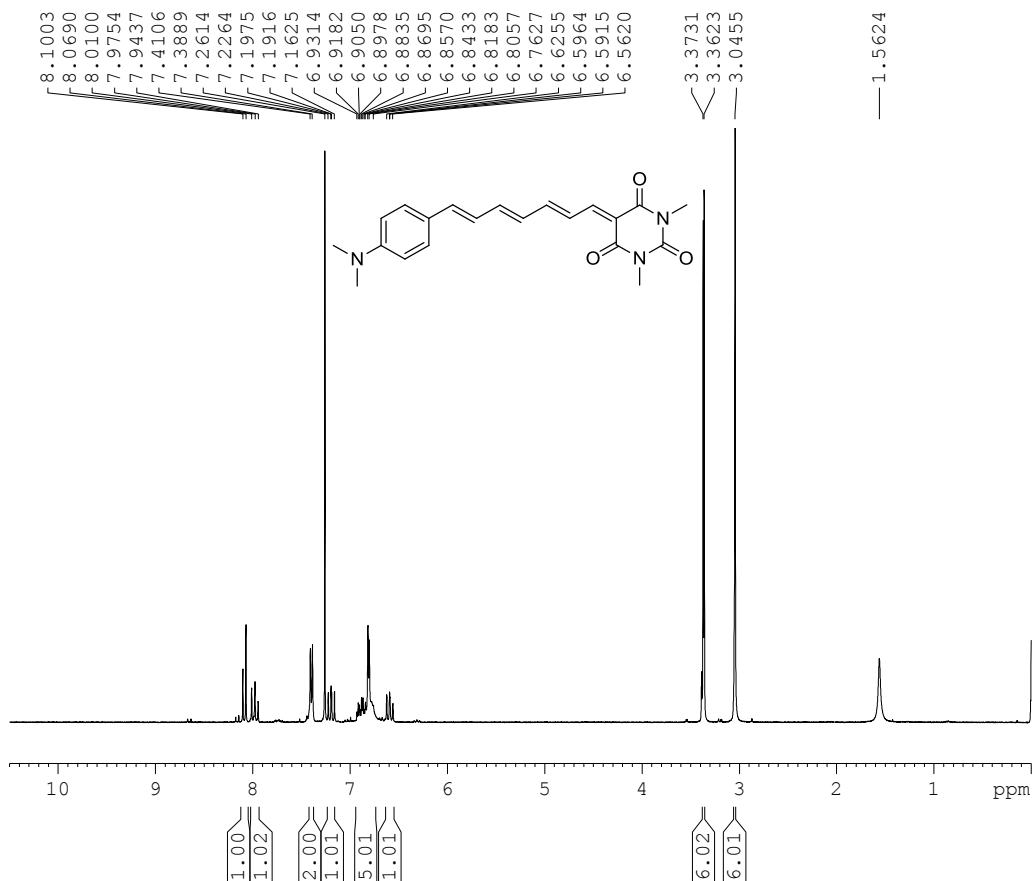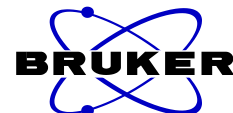

```

NAME      ZKX-BBTOM-4-20150527
EXPNO    1
PROCNO   1
Date_    20150527
Time     9.43
INSTRUM  spect
PROBHD   5 mm PABBO BB-
PULPROG  zg30
TD       65536
SOLVENT  CDCl3
NS       16
DS       2
SWH      8223.685 Hz
FIDRES   0.125483 Hz
AQ       3.9846387 sec
RG       203
DW       60.800 usec
DE       6.50 usec
TE       297.2 K
D1       1.00000000 sec
TD0     1
    
```

```

===== CHANNEL f1 =====
NUC1     1H
P1       13.80 usec
PL1      -1.00 dB
PL1W     13.18669796 W
SFO1     400.1724712 MHz
SI       32768
SF       400.1700027 MHz
WDW      EM
SSB      0
LB       0.30 Hz
GB       0
PC       1.00
    
```

<sup>1</sup>H NMR (CDCl<sub>3</sub>) spectrum of BBTOM-4

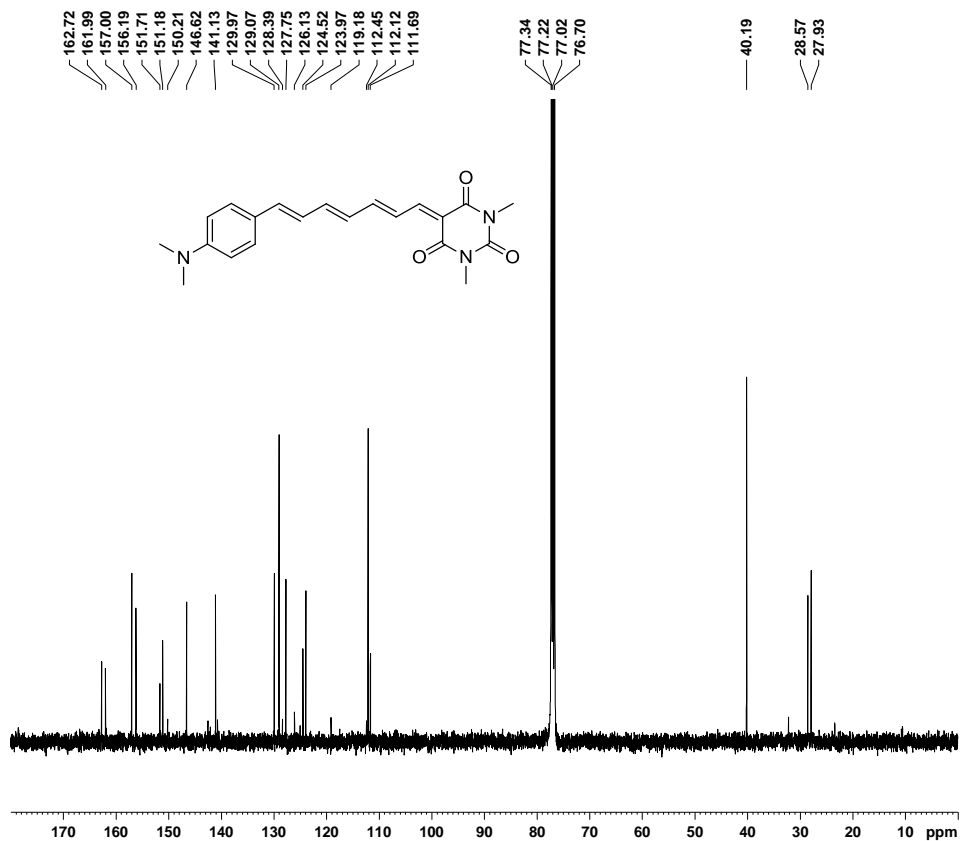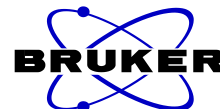

NAME ZKX-M-4-C-20140830  
EXPNO 1  
PROCNO 1  
Date\_ 20140830  
Time 21.35  
INSTRUM spect  
PROBHD 5 mm PABBO BB-  
PULPROG zgpg30  
TD 65536  
SOLVENT cdcl3  
NS 12000  
DS 4  
SWH 24038.461 Hz  
FIDRES 0.366798 Hz  
AQ 1.3631988 sec  
RG 203  
DW 20.800 usec  
DE 6.50 usec  
TE 300.6 K  
D1 2.0000000 sec  
D11 0.0300000 sec  
TD0 1

===== CHANNEL f1 =====  
NUC1 13C  
P1 8.50 usec  
PL1 -2.00 dB  
PL1W 57.32743073 W  
SF01 100.6328888 MHz

===== CHANNEL f2 =====  
CPDPRG2 waltz16  
NUC2 1H  
PCPD2 80.00 usec  
PL2 -1.00 dB  
PL12 14.26 dB  
PL13 14.46 dB  
PL2W 13.18669796 W  
PL12W 0.39276794 W  
PL13W 0.37509048 W  
SF02 400.1716007 MHz  
SI 32768  
SF 100.6228236 MHz  
WDW EM  
SSB 0  
LB 1.00 Hz  
GB 0  
PC 1.40

<sup>13</sup>C NMR (CDCl<sub>3</sub>) spectrum of BBTOM-4

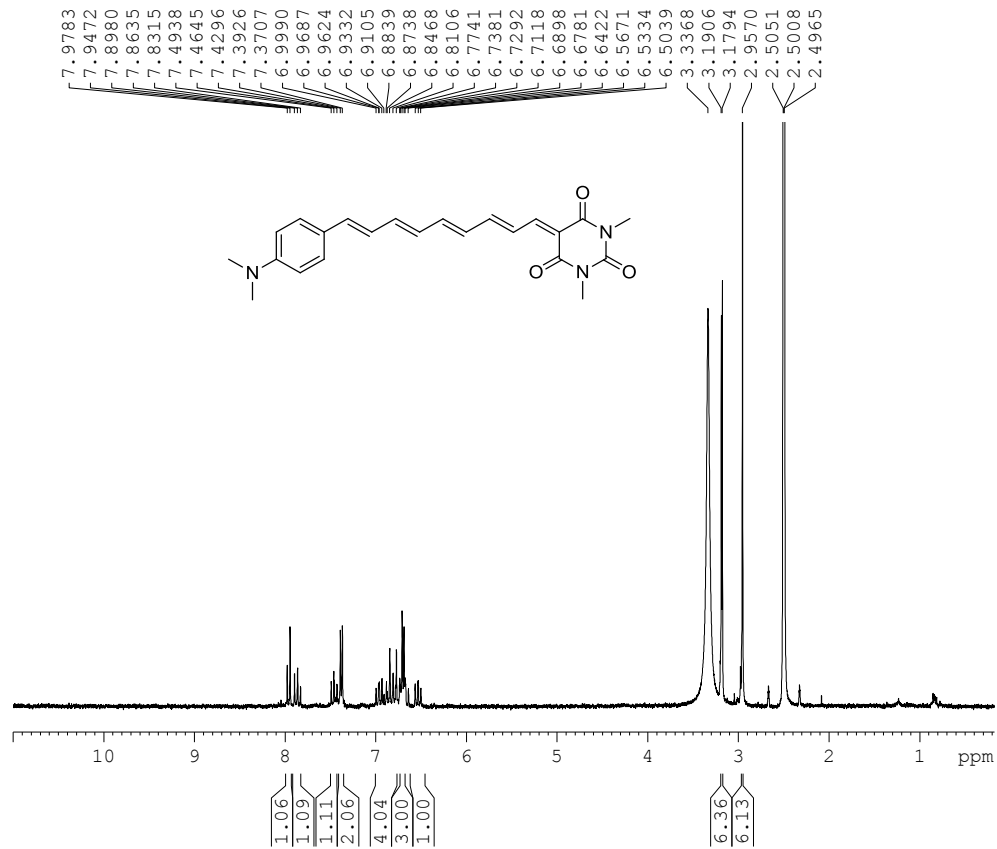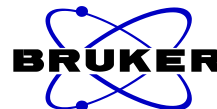

NAME ZKX-BBATO-M--S-2  
EXPNO 1  
PROCNO 1  
Date\_ 20140419  
Time 9.03  
INSTRUM spect  
PROBHD 5 mm PABBO BB-  
PULPROG zg30  
TD 65536  
SOLVENT DMSO  
NS 16  
DS 2  
SWH 8223.685 Hz  
FIDRES 0.125483 Hz  
AQ 3.9846387 sec  
RG 203  
DW 60.800 usec  
DE 6.50 usec  
TE 296.0 K  
D1 1.0000000 sec  
TD0 1

===== CHANNEL f1 =====  
NUC1 1H  
P1 13.80 usec  
PL1 -1.00 dB  
PL1W 13.18669796 W  
SF01 400.1724712 MHz  
SI 32768  
SF 400.1699940 MHz  
WDW EM  
SSB 0  
LB 0.30 Hz  
GB 0  
PC 1.00



<sup>1</sup>H NMR (CDCl<sub>3</sub>) spectrum of BBTOM-5

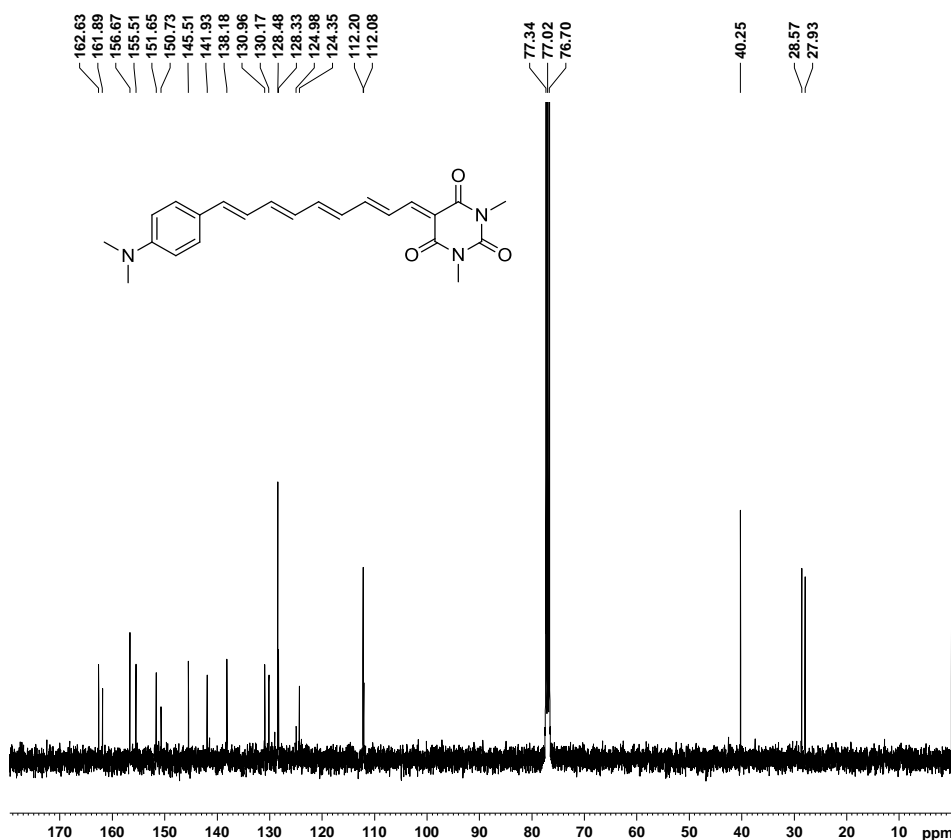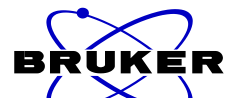

```

NAME      ZKX-BBATO-M-5-C
EXPNO    1
PROCNO   1
Date_    20140429
Time     22.24
INSTRUM  spect
PROBHD   5 mm PABBO BB-
PULPROG  zgpg30
TD       65536
SOLVENT  CDCl3
NS       1024
DS       4
SWH      24038.461 Hz
FIDRES   0.366798 Hz
AQ       1.3631988 sec
RG       203
DW       20.800 usec
DE       6.50 usec
TE       301.3 K
D1       2.00000000 sec
D11      0.03000000 sec
TD0     1
    
```

```

===== CHANNEL f1 =====
NUC1     13C
P1       8.50 usec
PL1      -2.00 dB
PL1W    57.32743073 W
SFO1    100.6328888 MHz
    
```

```

===== CHANNEL f2 =====
CPDPRG2  waltz16
NUC2     1H
PCPD2    80.00 usec
PL2      -1.00 dB
PL12     14.26 dB
PL13     14.46 dB
PL2W     13.18669796 W
PL12W    0.39276794 W
PL13W    0.37509048 W
SFO2    400.1716007 MHz
SI       32768
SF       100.6228238 MHz
WDW      EM
SSB      0
LB       1.00 Hz
GB       0
PC       1.40
    
```

<sup>13</sup>C NMR (CDCl<sub>3</sub>) spectrum of BBTOM-5

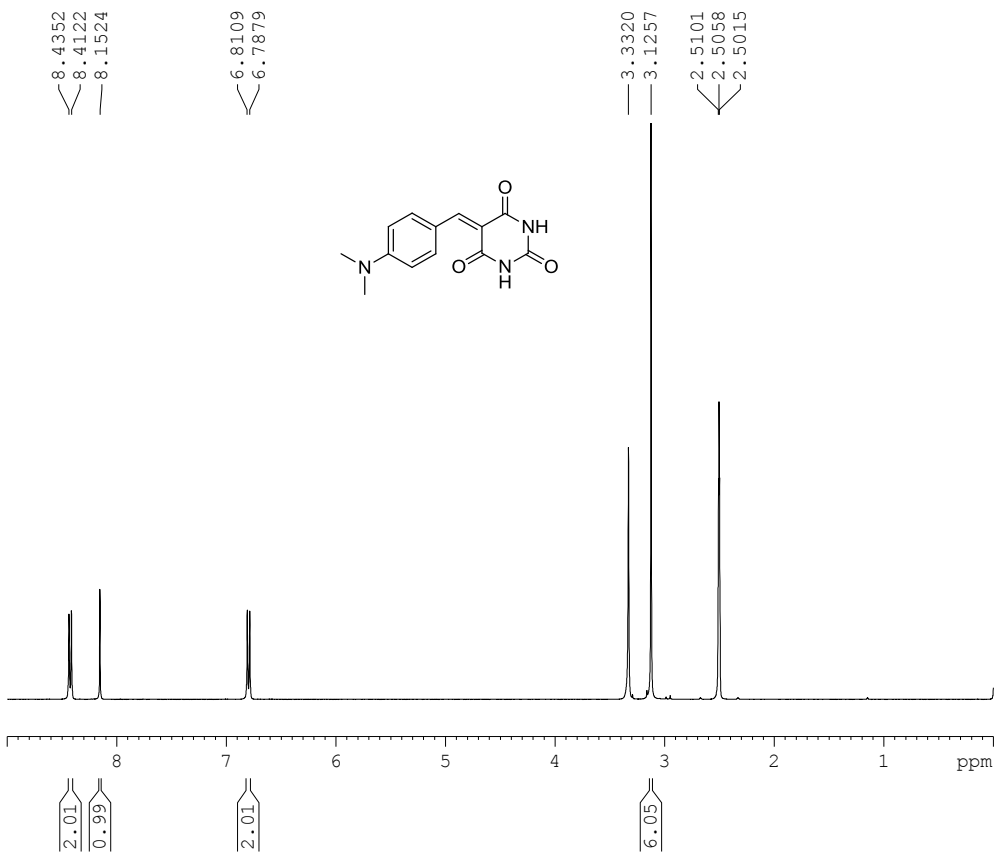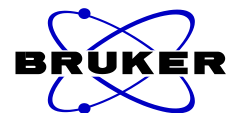

```

NAME      BBAT-1-NMe2
EXPNO    1
PROCNO   1
Date_    20110615
Time     17.03
INSTRUM  spect
PROBHD   5 mm PABBO BB-
PULPROG  zg30
TD       65536
SOLVENT  DMSO
NS       16
DS       2
SWH      8223.685 Hz
FIDRES   0.125483 Hz
AQ       3.9846387 sec
RG       203
DW       60.800 usec
DE       6.50 usec
TE       299.4 K
D1       1.00000000 sec
TD0     1
    
```

```

===== CHANNEL f1 =====
NUC1     1H
P1       14.20 usec
PL1      -1.00 dB
PL1W    13.18669796 W
SFO1    400.1724712 MHz
SI       32768
SF       400.1699932 MHz
WDW      EM
SSB      0
LB       0.30 Hz
GB       0
PC       1.00
    
```

<sup>1</sup>H NMR (DMSO-d<sub>6</sub>) spectrum of BBTO-1

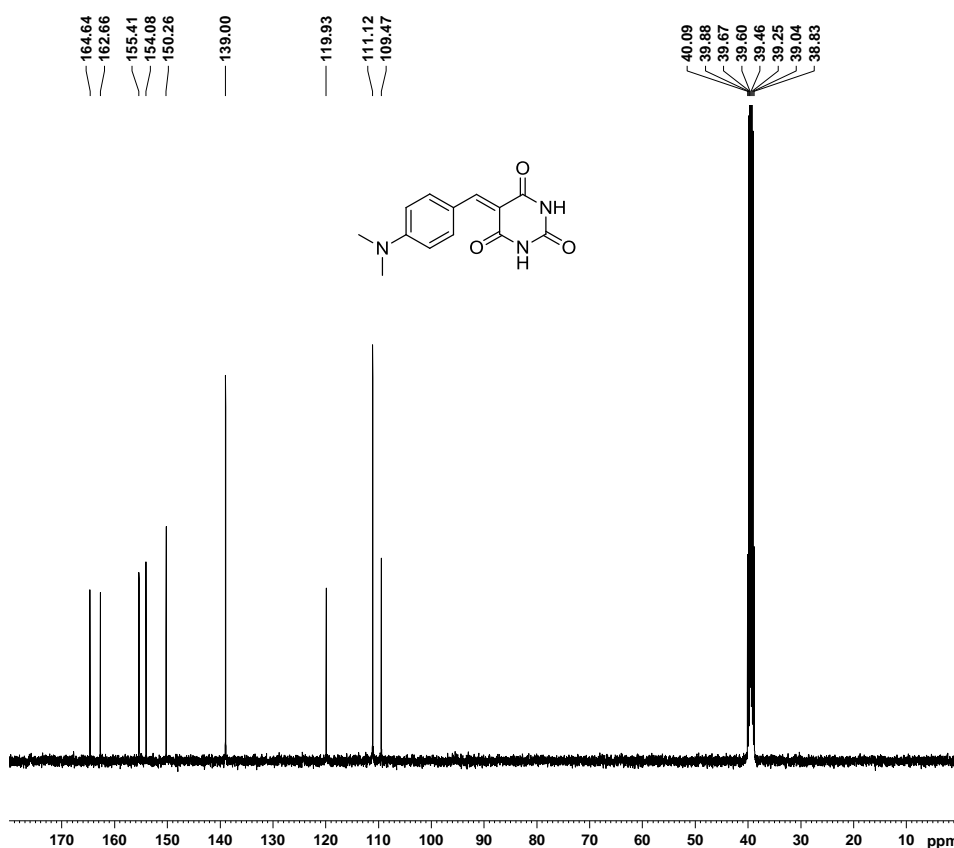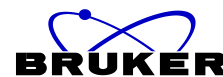

```

NAME      2KX-BBTO-1-C13
EXPNO     1
PROCNO    1
Date_     20150313
Time      23.03
INSTRUM   spect
PROBHD    5 mm PABBO BB-
PULPROG   zgpg30
TD        65536
SOLVENT   DMSO
NS        4
DS        4
SWH       24038.461 Hz
FIDRES    0.366798 Hz
AQ        1.3631988 sec
RG        203
DW        20.800 usec
DE        6.50 usec
TE        296.7 K
D1        2.00000000 sec
D11       0.03000000 sec
TD0       1
    
```

```

===== CHANNEL f1 =====
NUC1      13C
P1        8.50 usec
PL1       -2.00 dB
PL1W     57.32743073 W
SFO1     100.6328888 MHz
    
```

```

===== CHANNEL f2 =====
CPDPRG2   waltz16
NUC2      1H
PCPD2     80.00 usec
PL2       -1.00 dB
PL12      14.26 dB
PL13      14.46 dB
PL2W     13.18669796 W
PL12W    0.39276794 W
PL13W    0.37509048 W
SFO2     400.1716007 MHz
SI        32768
SF        100.6228773 MHz
WDW       EM
SSB       0
LB        1.00 Hz
GB        0
PC        1.40
    
```

<sup>13</sup>C NMR (DMSO-d<sub>6</sub>) spectrum of BBTO-1

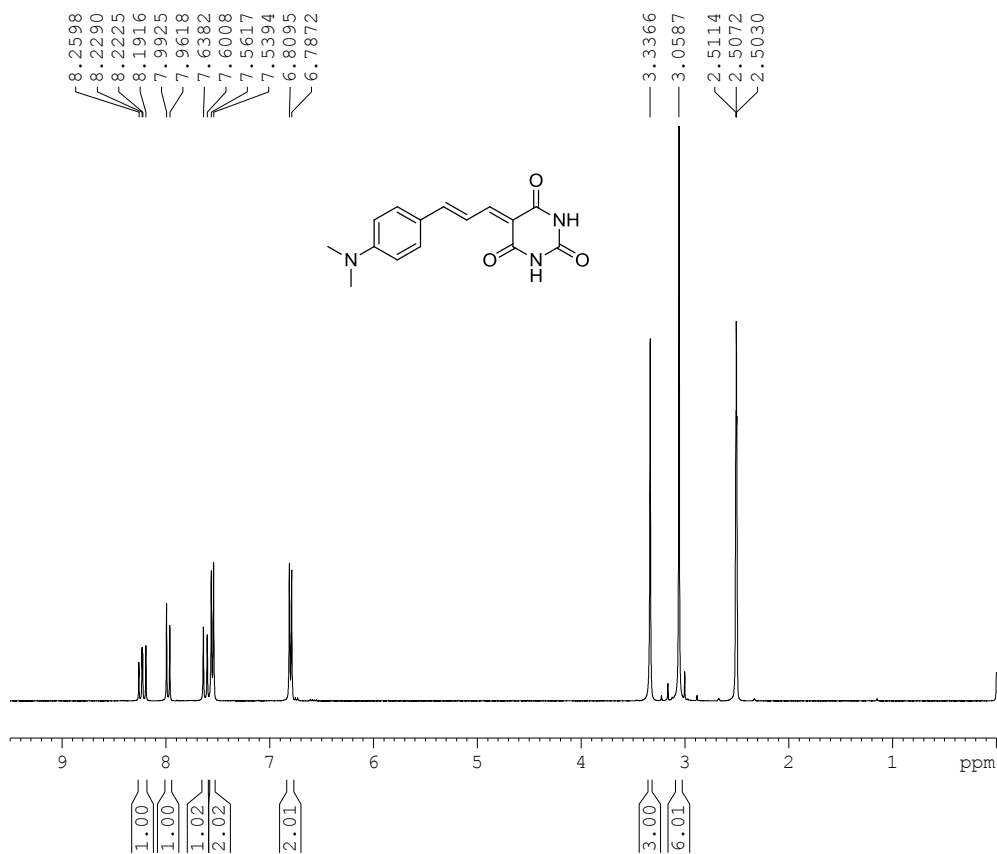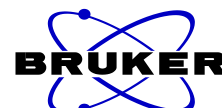

```

NAME      BBAT-2-NMe2
EXPNO     1
PROCNO    1
Date_     20110615
Time      17.07
INSTRUM   spect
PROBHD    5 mm PABBO BB-
PULPROG   zg30
TD        65536
SOLVENT   DMSO
NS        16
DS        2
SWH       8223.685 Hz
FIDRES    0.125483 Hz
AQ        3.9846387 sec
RG        203
DW        60.800 usec
DE        6.50 usec
TE        299.3 K
D1        1.00000000 sec
TD0       1
    
```

```

===== CHANNEL f1 =====
NUC1      1H
P1        14.20 usec
PL1       -1.00 dB
PL1W     13.18669796 W
SFO1     400.1724712 MHz
SI        32768
SF        400.1699925 MHz
WDW       EM
SSB       0
LB        0.30 Hz
GB        0
PC        1.00
    
```

<sup>1</sup>H NMR (DMSO-d<sub>6</sub>) spectrum of BBTO-2

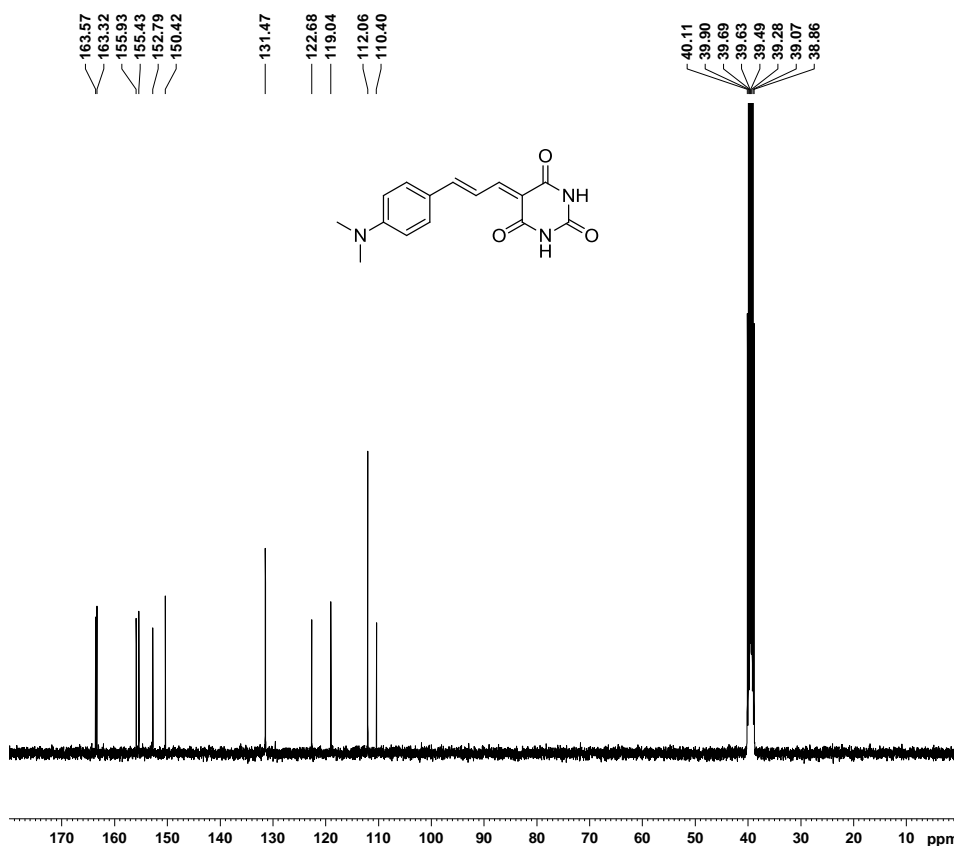

```

NAME      2KX-BBTO-2-C13
EXPNO     1
PROCNO    1
Date_     20150311
Time      14.36
INSTRUM   spect
PROBHD    5 mm PABBO BB-
PULPROG   zgpg30
TD        65536
SOLVENT   DMSO
NS        1746
DS        4
SWH       24038.461 Hz
FIDRES    0.366798 Hz
AQ        1.3631988 sec
RG        203
DW        20.800 usec
DE        6.50 usec
TE        298.6 K
D1        2.00000000 sec
D11       0.03000000 sec
TD0       1
    
```

```

===== CHANNEL f1 =====
NUC1      13C
P1        8.50 usec
PL1       -2.00 dB
PL1W     57.32743073 W
SFO1     100.6328888 MHz
    
```

```

===== CHANNEL f2 =====
CPDPRG2   waltz16
NUC2      1H
PCPD2     80.00 usec
PL2       -1.00 dB
PL12      14.26 dB
PL13      14.46 dB
PL2W     13.18669796 W
PL12W    0.39276794 W
PL13W    0.37509048 W
SFO2     400.1716007 MHz
SI        32768
SF        100.6228773 MHz
WDW       EM
SSB       0
LB        1.00 Hz
GB        0
PC        1.40
    
```

<sup>13</sup>C NMR (DMSO-d<sub>6</sub>) spectrum of BBTO-2

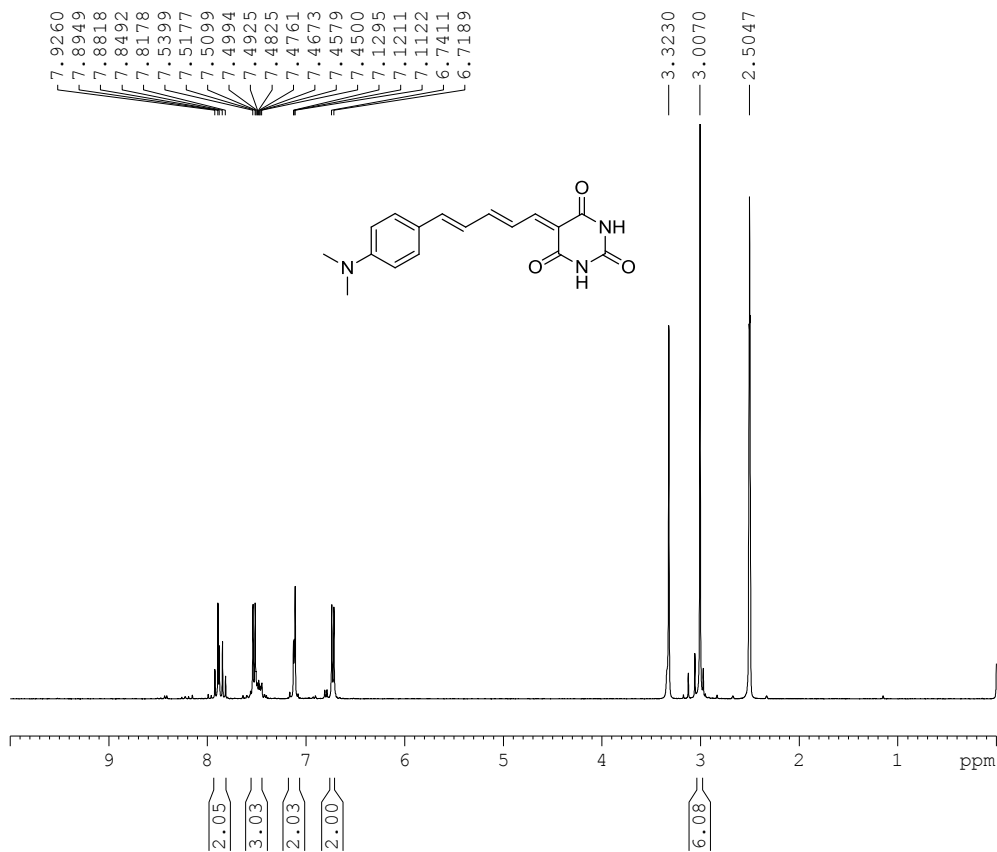

```

NAME      BBAT-3-NMe2
EXPNO     1
PROCNO    1
Date_     20110617
Time      11.19
INSTRUM   spect
PROBHD    5 mm PABBO BB-
PULPROG   zg30
TD        65536
SOLVENT   DMSO
NS        16
DS        2
SWH       8223.685 Hz
FIDRES    0.125483 Hz
AQ        3.9846387 sec
RG        203
DW        60.800 usec
DE        6.50 usec
TE        300.0 K
D1        1.00000000 sec
TD0       1
    
```

```

===== CHANNEL f1 =====
NUC1      1H
P1        14.20 usec
PL1       -1.00 dB
PL1W     13.18669796 W
SFO1     400.1724712 MHz
SI        32768
SF        400.1699938 MHz
WDW       EM
SSB       0
LB        0.30 Hz
GB        0
PC        1.00
    
```

<sup>1</sup>H NMR (DMSO-d<sub>6</sub>) spectrum of BBTO-3

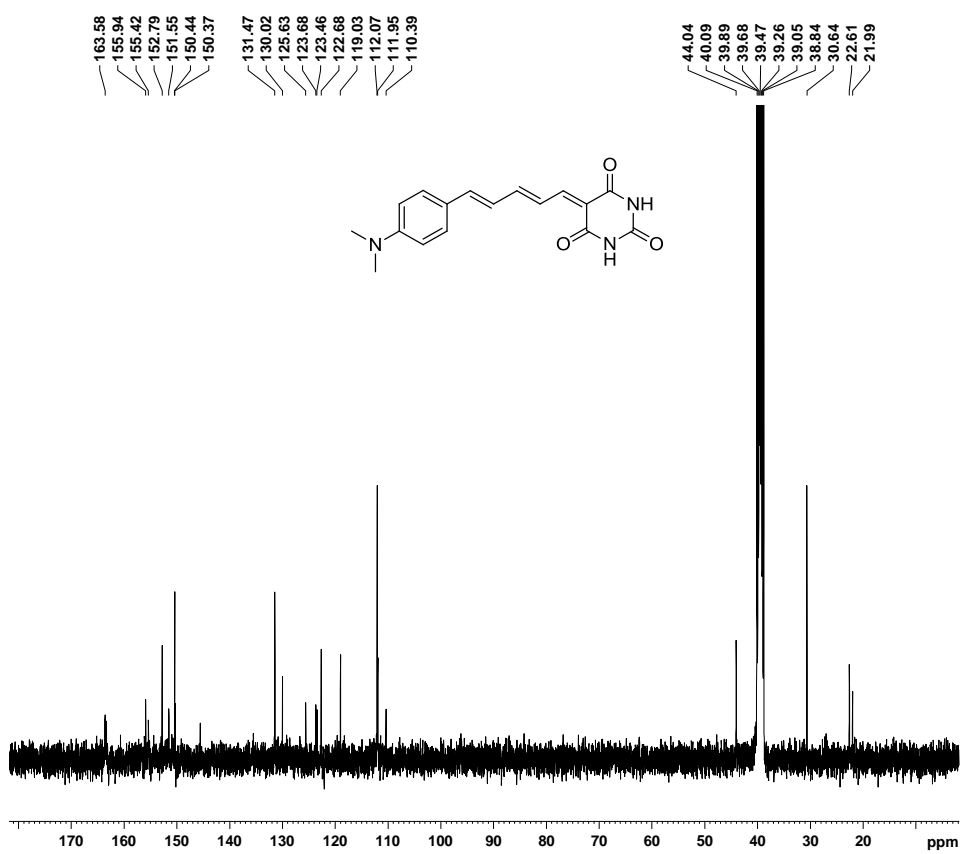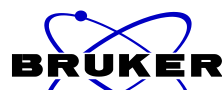

```

NAME      ZKX-BBTO-3-C13
EXPNO    1
PROCNO   1
Date_    20150314
Time     1.29
INSTRUM  spect
PROBHD   5 mm PABBO BB-
PULPROG  zgpg30
TD       65536
SOLVENT  DMSO
NS       2500
DS       4
SWH      24038.461 Hz
FIDRES   0.366798 Hz
AQ       1.3631988 sec
RG       203
DW       20.800 usec
DE       6.50 usec
TE       296.3 K
D1       2.00000000 sec
D11      0.03000000 sec
TD0     1
    
```

```

===== CHANNEL f1 =====
NUC1     13C
P1       8.50 usec
PL1     -2.00 dB
PL1W    57.32743073 W
SFO1    100.6328888 MHz

===== CHANNEL f2 =====
CPDPRG2  waltz16
NUC2     1H
PCPD2   80.00 usec
PL2     -1.00 dB
PL12    14.26 dB
PL13    14.46 dB
PL2W    13.18669796 W
PL12W   0.39276794 W
PL13W   0.37509048 W
SFO2    400.1716007 MHz
SI      32768
SF      100.6228773 MHz
WDW     EM
SSB     0
LB      1.00 Hz
GB      0
PC      1.40
    
```

<sup>13</sup>C NMR (DMSO-d<sub>6</sub>) spectrum of BBTO-3

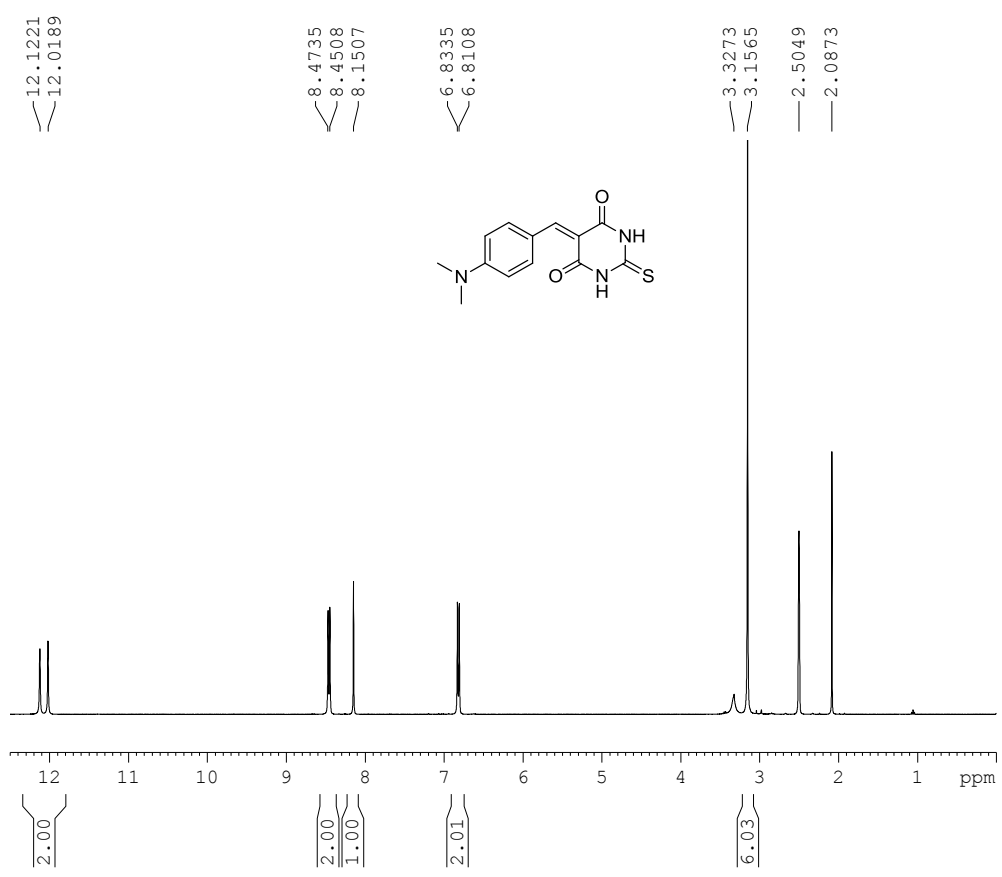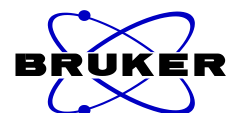

```

NAME      BBATS-1
EXPNO    1
PROCNO   1
Date_    20110818
Time     15.49
INSTRUM  spect
PROBHD   5 mm PABBO BB-
PULPROG  zg30
TD       65536
SOLVENT  DMSO
NS       16
DS       2
SWH      8223.685 Hz
FIDRES   0.125483 Hz
AQ       3.9846387 sec
RG       203
DW       60.800 usec
DE       6.50 usec
TE       300.1 K
D1       1.00000000 sec
TD0     1
    
```

```

===== CHANNEL f1 =====
NUC1     1H
P1       13.80 usec
PL1     -1.00 dB
PL1W    13.18669796 W
SFO1    400.1724712 MHz
SI      32768
SF      400.1699937 MHz
WDW     EM
SSB     0
LB      0.30 Hz
GB      0
PC      1.00
    
```

<sup>1</sup>H NMR (DMSO-d<sub>6</sub>) spectrum of BBTS-1

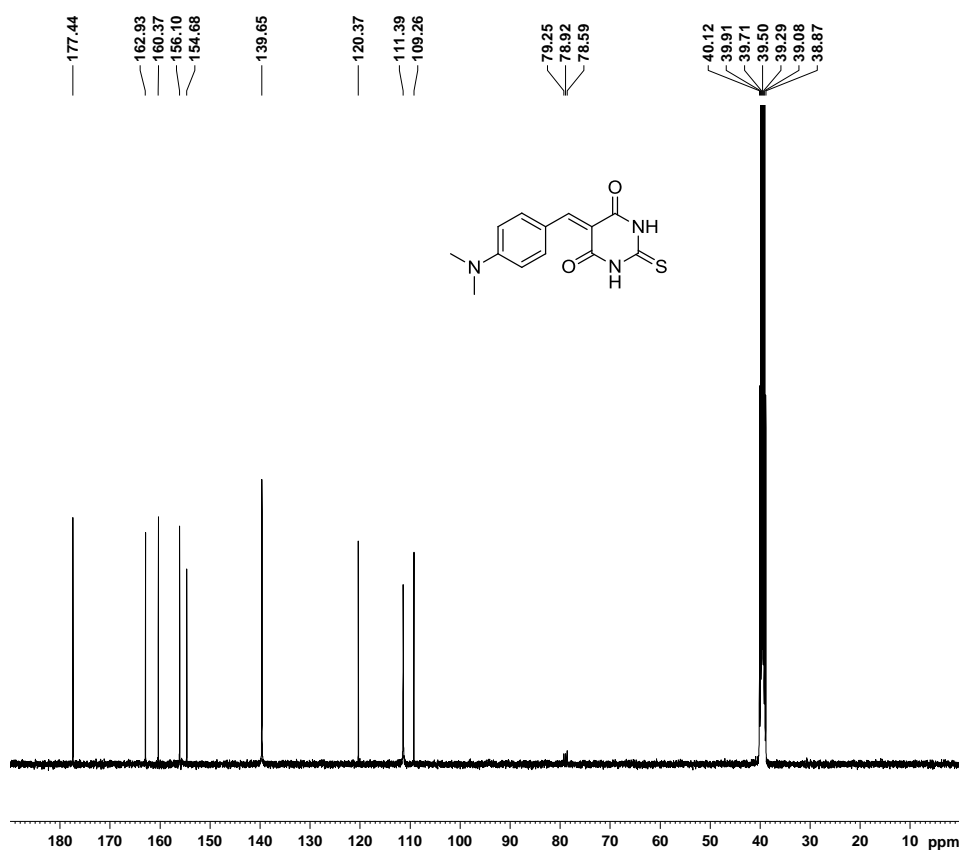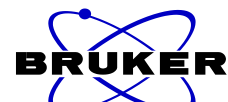

```

NAME      BBATS-1-C13
EXPNO     1
PROCNO    1
Date_     20110901
Time      14.06
INSTRUM   spect
PROBHD    5 mm PABBO BB-
PULPROG   zgpg30
TD        65536
SOLVENT   DMSO
NS        3639
DS        4
SWH       24038.461 Hz
FIDRES    0.366798 Hz
AQ        1.3631988 sec
RG        203
DW        20.800 usec
DE        6.50 usec
TE        299.8 K
D1        2.00000000 sec
D11       0.03000000 sec
TD0       1
    
```

```

===== CHANNEL f1 =====
NUC1      13C
P1        8.50 usec
PL1       -2.00 dB
PL1W      57.32743073 W
SFO1      100.6328888 MHz
    
```

```

===== CHANNEL f2 =====
CPDPRG2   waltz16
NUC2      1H
PCPD2     80.00 usec
PL2       -1.00 dB
PL12      14.26 dB
PL13      14.46 dB
PL2W      13.18669796 W
PL12W     0.39276794 W
PL13W     0.37509048 W
SFO2      400.1716007 MHz
SI        32768
SF        100.6228773 MHz
WDW       EM
SSB       0
LB        1.00 Hz
GB        0
PC        1.40
    
```

<sup>13</sup>C NMR (DMSO-d<sub>6</sub>) spectrum of BBTS-1

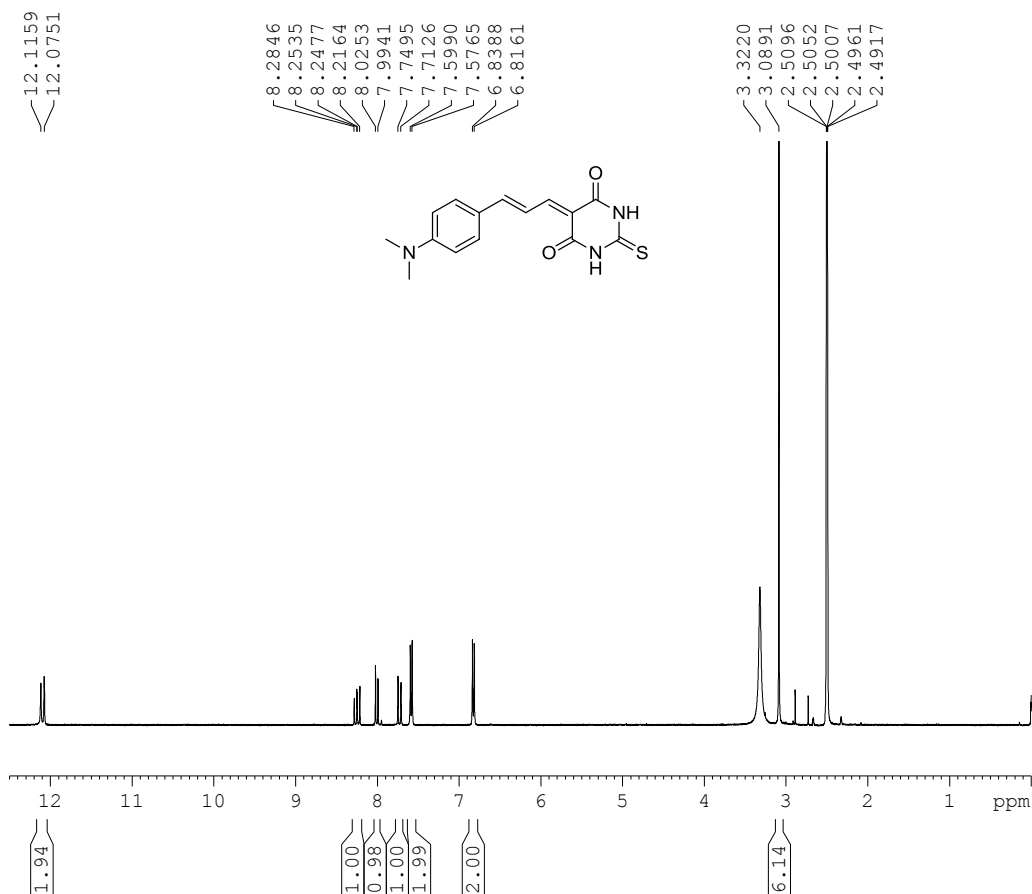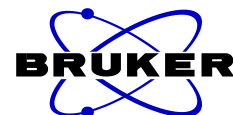

```

NAME      ZKX-BBTS-2-20150518
EXPNO     1
PROCNO    1
Date_     20150518
Time      19.04
INSTRUM   spect
PROBHD    5 mm PABBO BB-
PULPROG   zg30
TD        65536
SOLVENT   DMSO
NS        16
DS        2
SWH       8223.685 Hz
FIDRES    0.125483 Hz
AQ        3.9846387 sec
RG        203
DW        60.800 usec
DE        6.50 usec
TE        298.1 K
D1        1.00000000 sec
TD0       1
    
```

```

===== CHANNEL f1 =====
NUC1      1H
P1        13.80 usec
PL1       -1.00 dB
PL1W      13.18669796 W
SFO1      400.1724712 MHz
SI        32768
SF        400.1699949 MHz
WDW       EM
SSB       0
LB        0.30 Hz
GB        0
PC        1.00
    
```

<sup>1</sup>H NMR (DMSO-d<sub>6</sub>) spectrum of BBTS-2

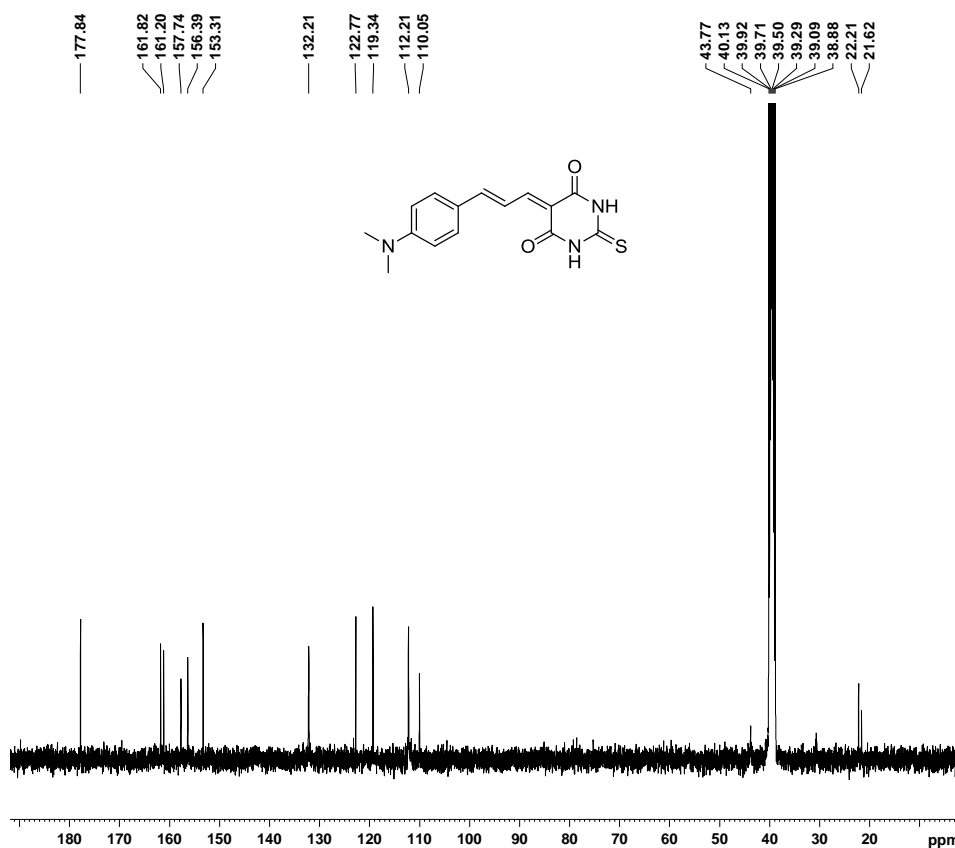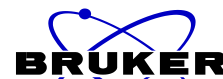

```

NAME      BBATS-2-C13
EXPNO    1
PROCNO   1
Date_    20110831
Time     21.50
INSTRUM  spect
PROBHD   5 mm PABBO BB-
PULPROG  zgpg30
TD       65536
SOLVENT  DMSO
NS       6000
DS       4
SWH      24038.461 Hz
FIDRES   0.366798 Hz
AQ       1.3631988 sec
RG       203
DW       20.800 usec
DE       6.50 usec
TE       301.3 K
D1       2.00000000 sec
D11      0.03000000 sec
TD0     1
    
```

```

===== CHANNEL f1 =====
NUC1     13C
P1       8.50 usec
PL1      -2.00 dB
PL1W    57.32743073 W
SFO1    100.6328888 MHz
    
```

```

===== CHANNEL f2 =====
CPDPRG2  waltz16
NUC2     1H
PCPD2    80.00 usec
PL2      -1.00 dB
PL12     14.26 dB
PL13     14.46 dB
PL2W    13.18669796 W
PL12W   0.39276794 W
PL13W   0.37509048 W
SFO2    400.1716007 MHz
SI       32768
SF       100.6228773 MHz
WDW      EM
SSB      0
LB       1.00 Hz
GB       0
PC       1.40
    
```

<sup>13</sup>C NMR (DMSO-d<sub>6</sub>) spectrum of BBTS-2

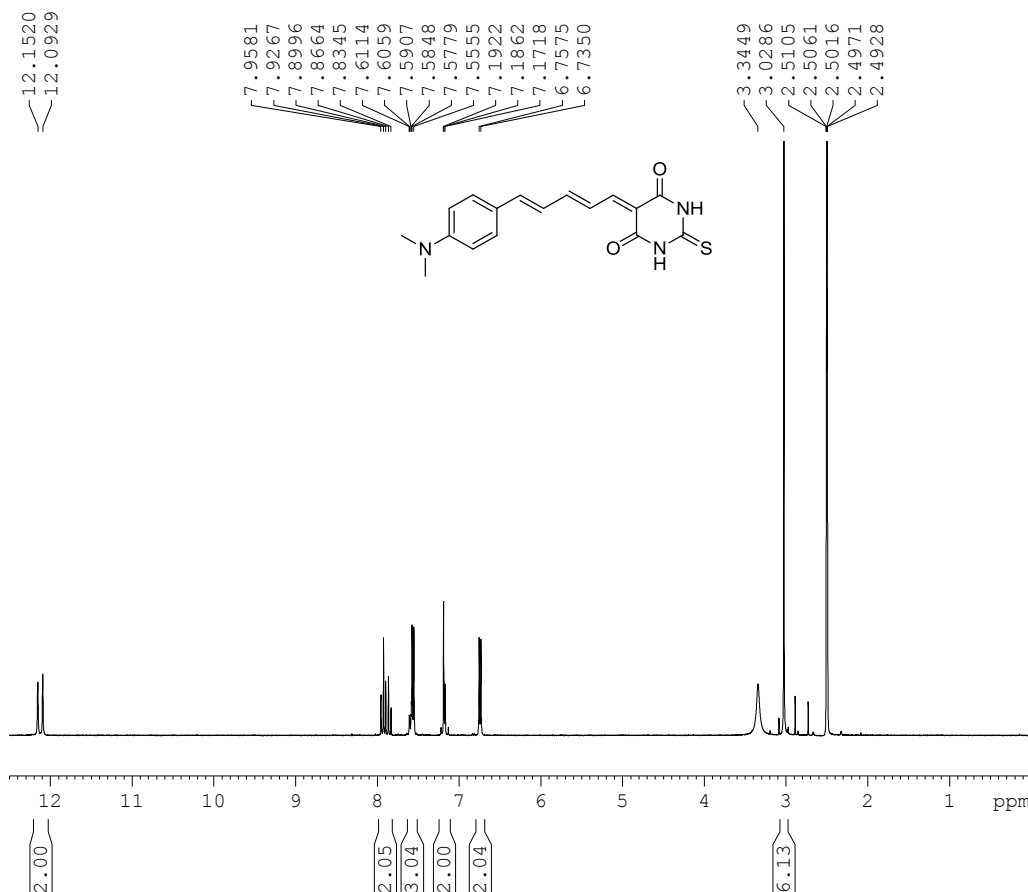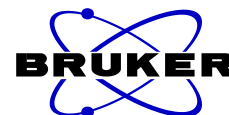

```

NAME      ZKX-BBTS-3-20150518
EXPNO    1
PROCNO   1
Date_    20150518
Time     19.08
INSTRUM  spect
PROBHD   5 mm PABBO BB-
PULPROG  zg30
TD       65536
SOLVENT  DMSO
NS       16
DS       2
SWH      8223.685 Hz
FIDRES   0.125483 Hz
AQ       3.9846387 sec
RG       203
DW       60.800 usec
DE       6.50 usec
TE       297.8 K
D1       1.00000000 sec
TD0     1
    
```

```

===== CHANNEL f1 =====
NUC1     1H
P1       13.80 usec
PL1      -1.00 dB
PL1W    13.18669796 W
SFO1    400.1724712 MHz
SI       32768
SF       400.1699945 MHz
WDW      EM
SSB      0
LB       0.30 Hz
GB       0
PC       1.00
    
```

<sup>1</sup>H NMR (DMSO-d<sub>6</sub>) spectrum of BBTS-3

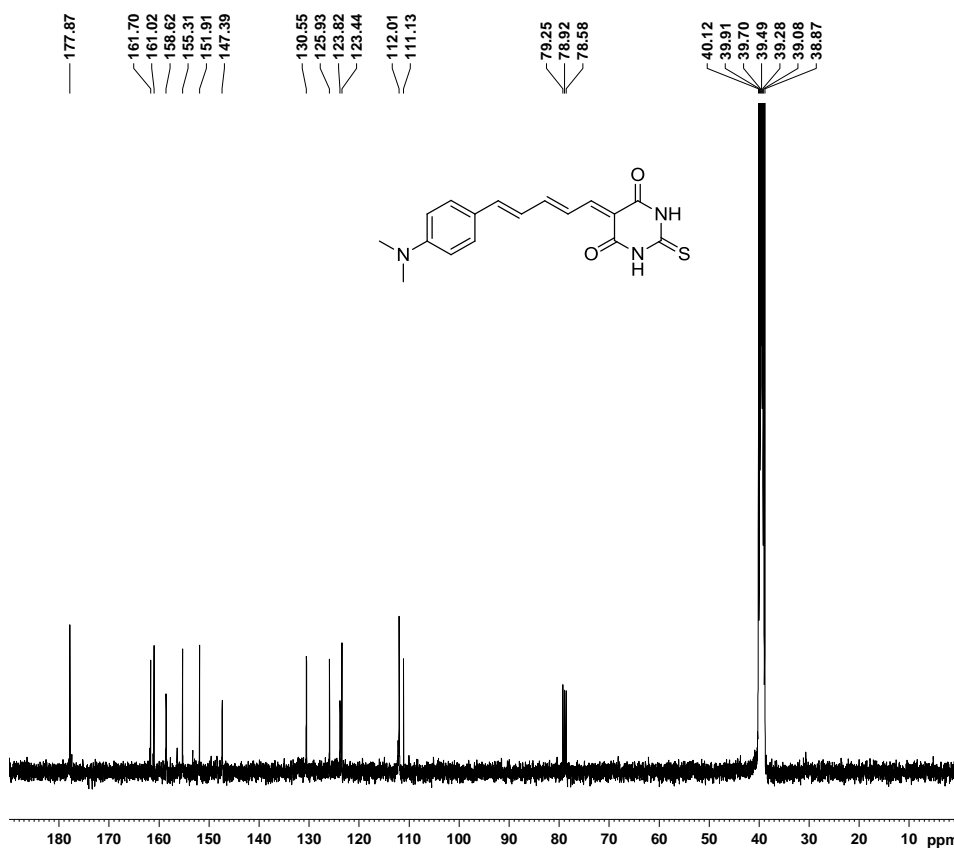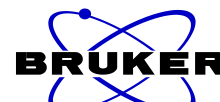

```

NAME      BBATS-3-C13
EXPNO     1
PROCNO    1
Date_     20110830
Time      6.40
INSTRUM   spect
PROBHD    5 mm PABBO BB-
PULPROG   zgpg30
TD        65536
SOLVENT   DMSO
NS        8000
DS         4
SWH        24038.461 Hz
FIDRES     0.366798 Hz
AQ         1.3631988 sec
RG         203
DW         20.800 usec
DE         6.50 usec
TE         297.0 K
D1         2.00000000 sec
D11        0.03000000 sec
TD0        1
    
```

```

===== CHANNEL f1 =====
NUC1      13C
P1        8.50 usec
PL1       -2.00 dB
PL1W      57.32743073 W
SFO1      100.6328888 MHz
    
```

```

===== CHANNEL f2 =====
CPDPRG2   waltz16
NUC2      1H
PCPD2     80.00 usec
PL2       -1.00 dB
PL12      14.26 dB
PL13      14.46 dB
PL2W      13.18669796 W
PL12W     0.39276794 W
PL13W     0.37509048 W
SFO2      400.1716007 MHz
SI         32768
SF         100.6228773 MHz
WDW        EM
SSB        0
LB         1.00 Hz
GB         0
PC         1.40
    
```

<sup>13</sup>C NMR (DMSO-d<sub>6</sub>) spectrum of BBTS-3

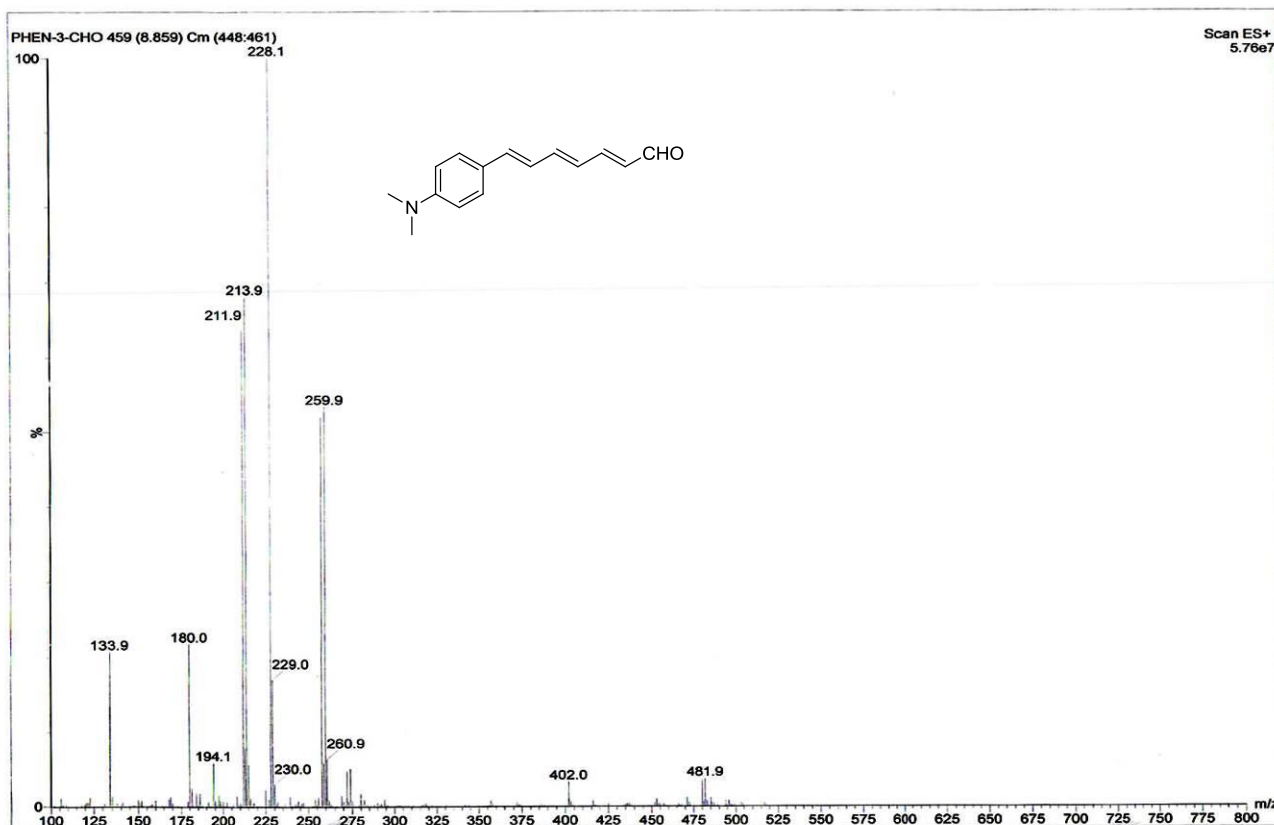

MS spectrum of compound 2

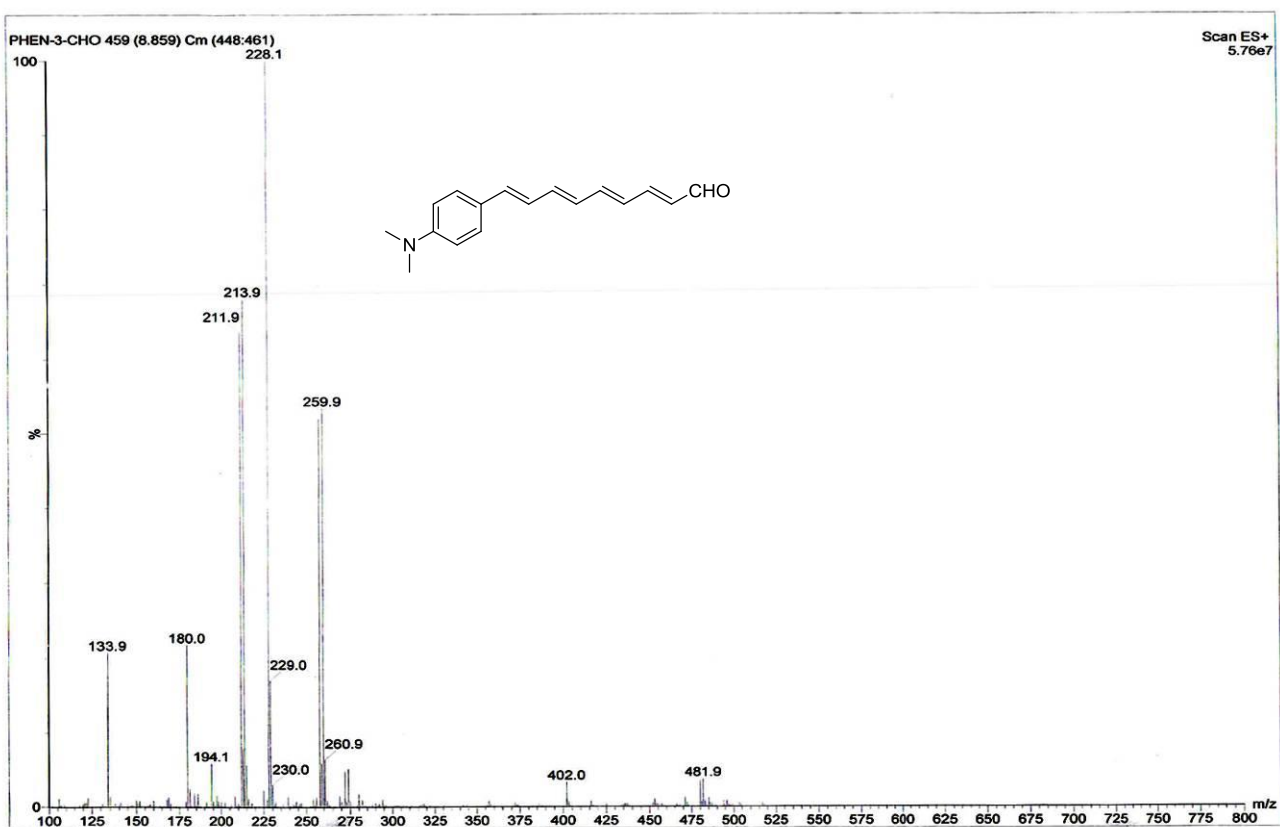

MS spectrum of compound 3

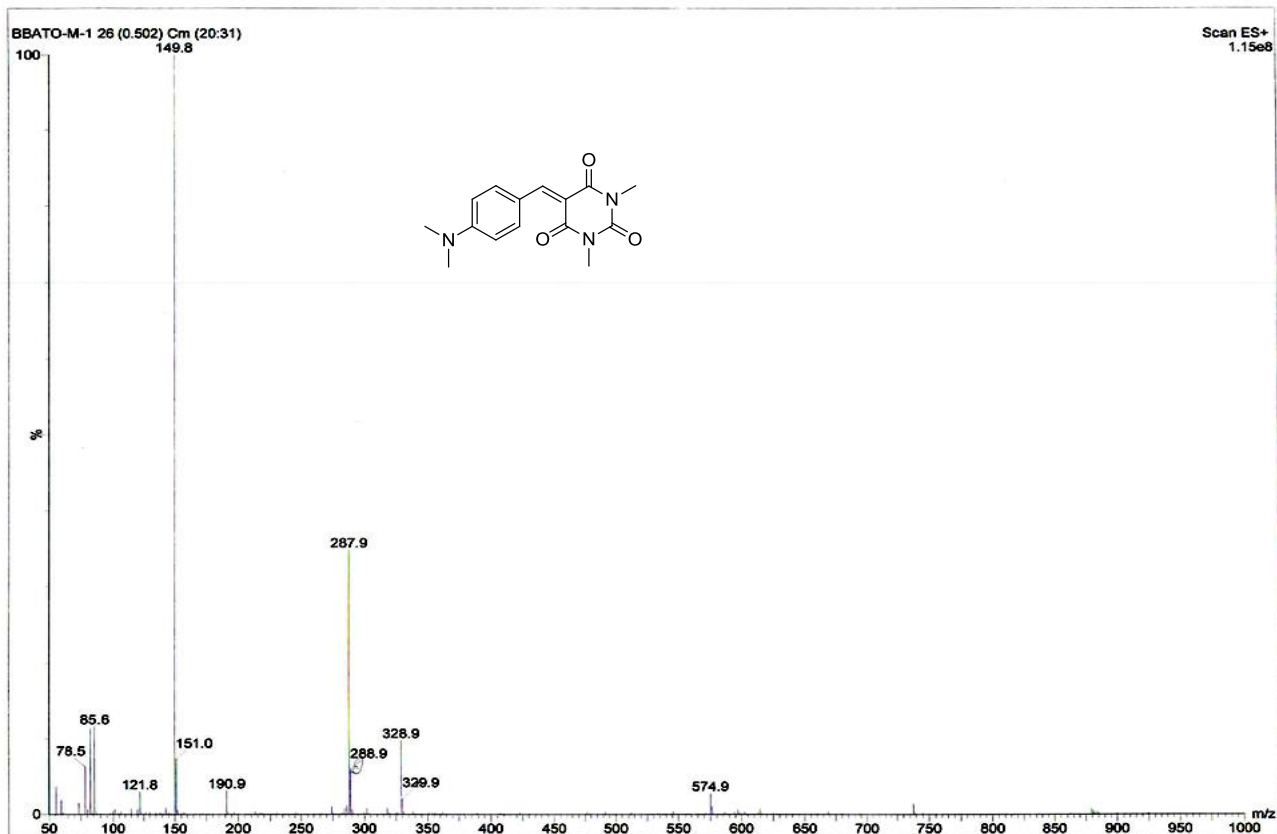



MS spectrum of BBTOM-1

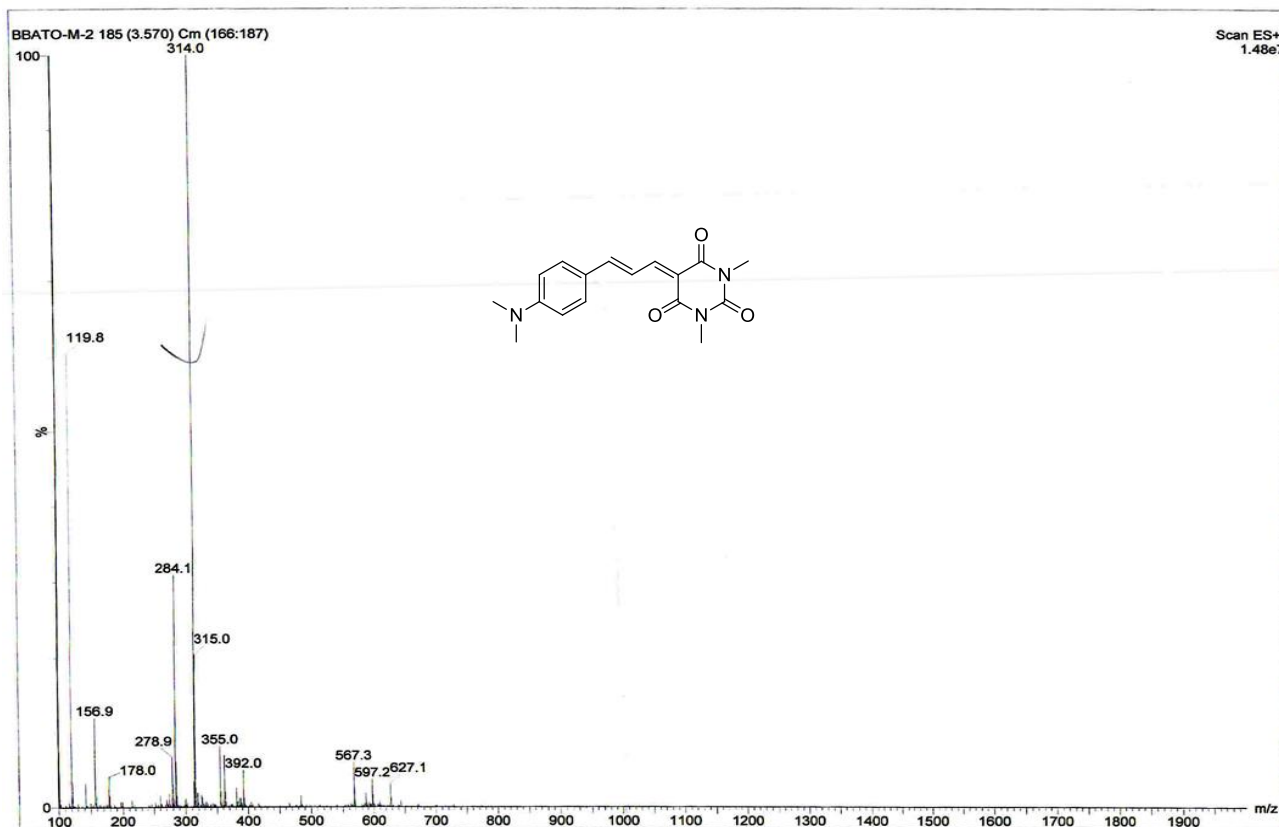

MS spectrum of BBTOM-2

Elemental Composition Report

Single Mass Analysis

Tolerance = 3.0 PPM / DBE: min = -1.5, max = 100.0

Element prediction: Off

Number of isotope peaks used for i-FIT = 2

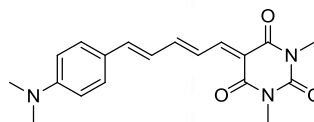

Monoisotopic Mass, Even Electron Ions

205 formula(e) evaluated with 1 results within limits (up to 100 best isotopic matches for each mass)

Elements Used:

C: 0-30 H: 0-30 N: 0-10 O: 0-6

BBATO-M-3 6 (0.102)

TOF MS ES+

1.57e+003

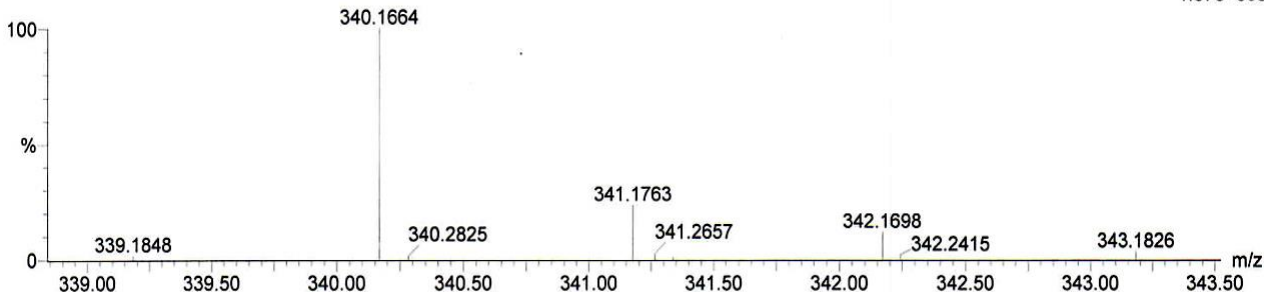

Minimum:

Maximum: 5.0 3.0 -1.5 100.0

| Mass     | Calc. Mass | mDa | PPM | DBE  | i-FIT | Formula       |
|----------|------------|-----|-----|------|-------|---------------|
| 340.1664 | 340.1661   | 0.3 | 0.9 | 10.5 | 0.6   | C19 H22 N3 O3 |

**Elemental Composition Report**

**Single Mass Analysis**

Tolerance = 3.0 PPM / DBE: min = -1.5, max = 100.0  
 Element prediction: Off  
 Number of isotope peaks used for i-FIT = 2

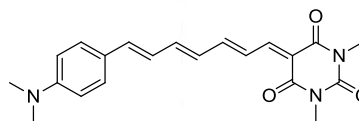

Monoisotopic Mass, Even Electron Ions

206 formula(e) evaluated with 1 results within limits (up to 100 best isotopic matches for each mass)

Elements Used:

C: 0-30 H: 0-30 N: 0-10 O: 0-6

BBATO-M-4 2 (0.034)

TOF MS ES+

3.42e+003

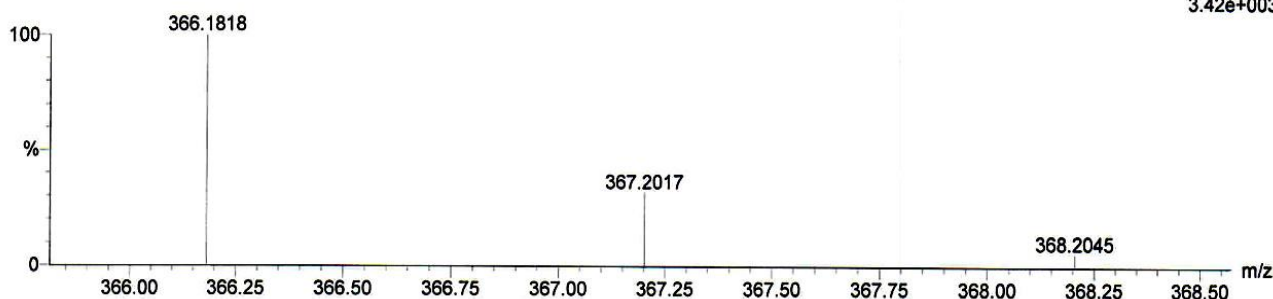

Minimum: -1.5  
 Maximum: 5.0 3.0 100.0

| Mass     | Calc. Mass | mDa | PPM | DBE  | i-FIT | Formula       |
|----------|------------|-----|-----|------|-------|---------------|
| 366.1818 | 366.1818   | 0.0 | 0.0 | 11.5 | 25.7  | C21 H24 N3 O3 |

**Elemental Composition Report**

**Single Mass Analysis**

Tolerance = 3.0 PPM / DBE: min = -1.5, max = 100.0  
 Element prediction: Off  
 Number of isotope peaks used for i-FIT = 2

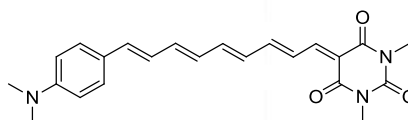

Monoisotopic Mass, Even Electron Ions

202 formula(e) evaluated with 1 results within limits (up to 100 best isotopic matches for each mass)

Elements Used:

C: 0-30 H: 0-30 N: 0-10 O: 0-6

BBATO-M-5 10 (0.170)

TOF MS ES+

5.37e+003

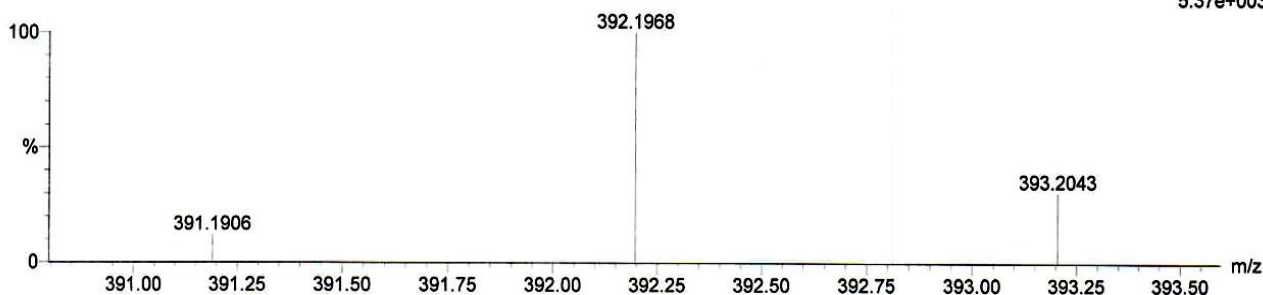

Minimum: -1.5  
 Maximum: 5.0 3.0 100.0

| Mass     | Calc. Mass | mDa  | PPM  | DBE  | i-FIT | Formula       |
|----------|------------|------|------|------|-------|---------------|
| 392.1968 | 392.1974   | -0.6 | -1.5 | 12.5 | 8.4   | C23 H26 N3 O3 |

HRMS spectrum of BBTOM-5

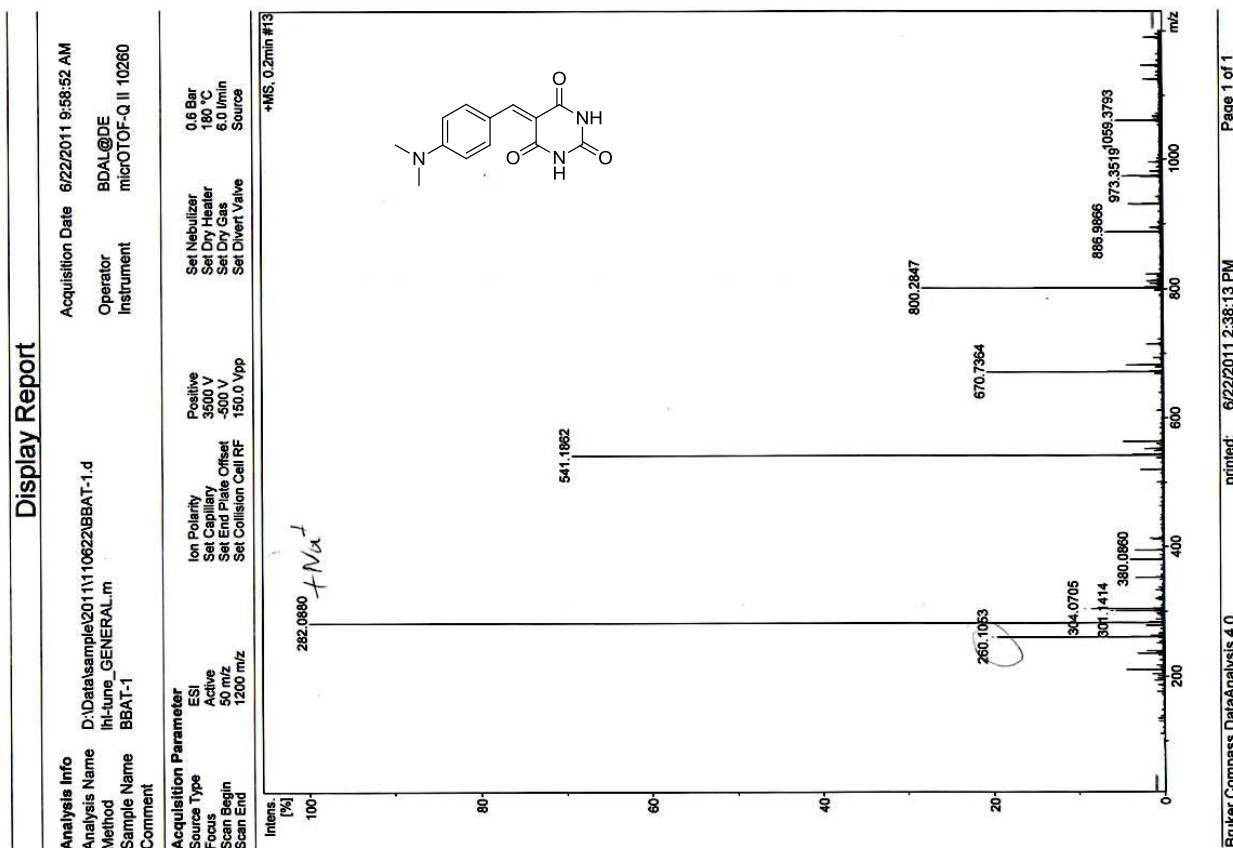
 printed: 6/22/2011 2:38:13 PM  
 Bruker Compass DataAnalysis 4.0  
 Page 1 of 1
 

MS spectrum of BBTO-1

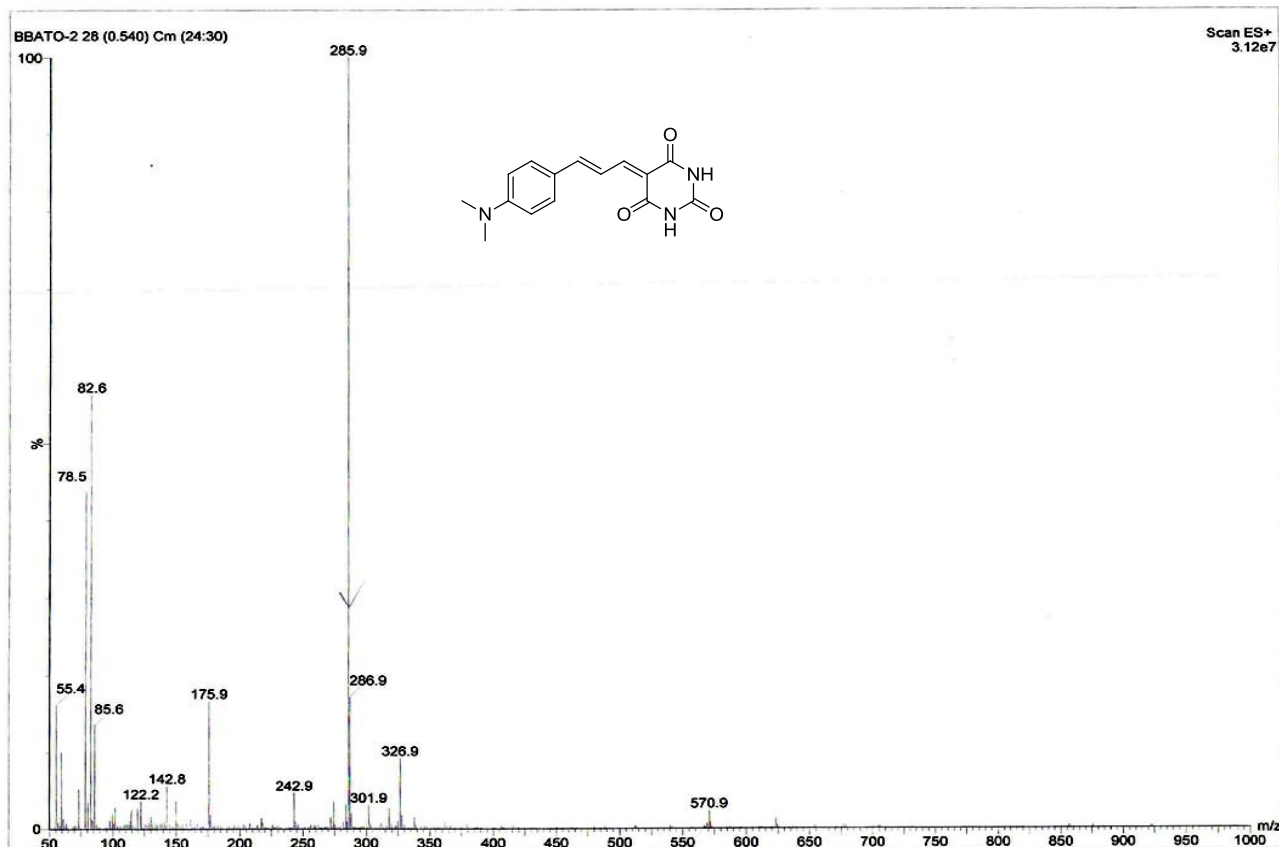

MS spectrum of BBTO-2

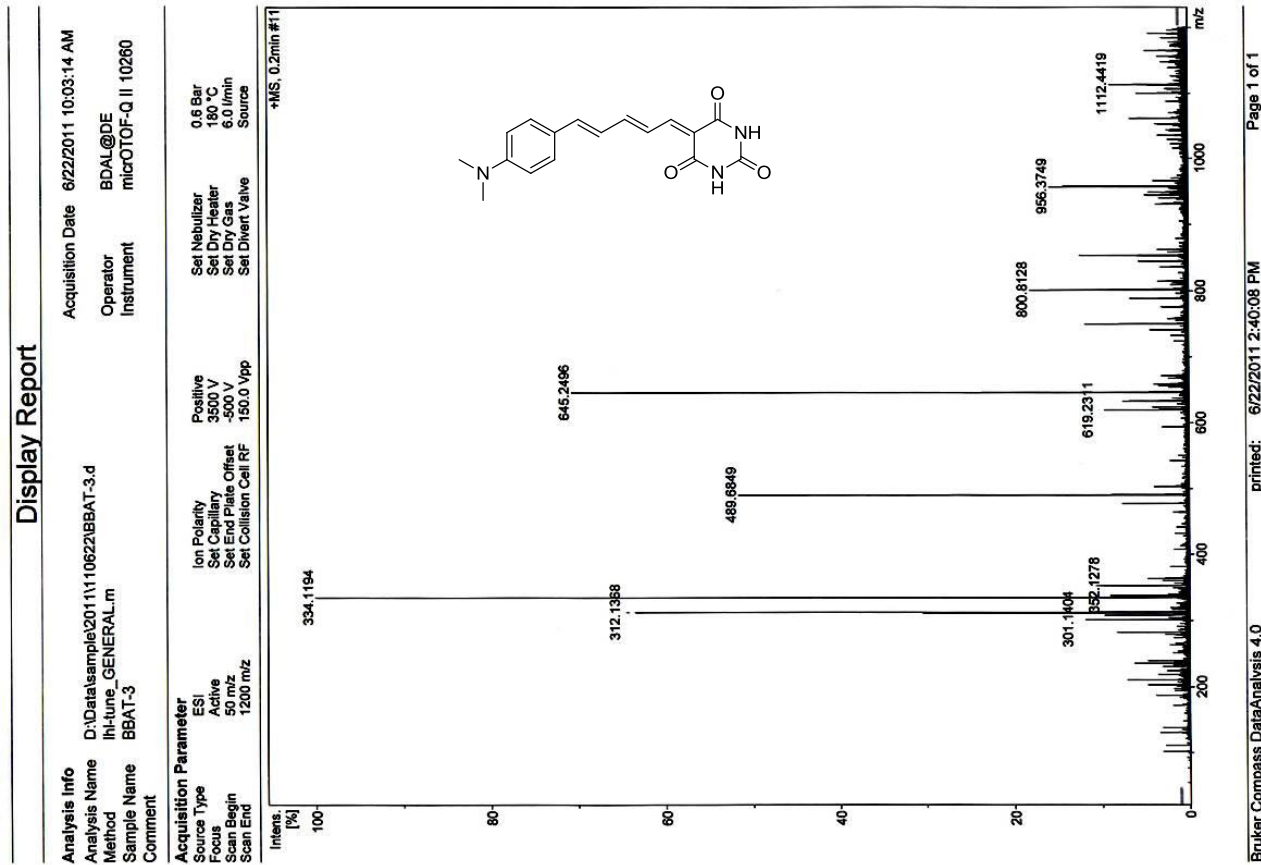

MS spectrum of BBTO-3

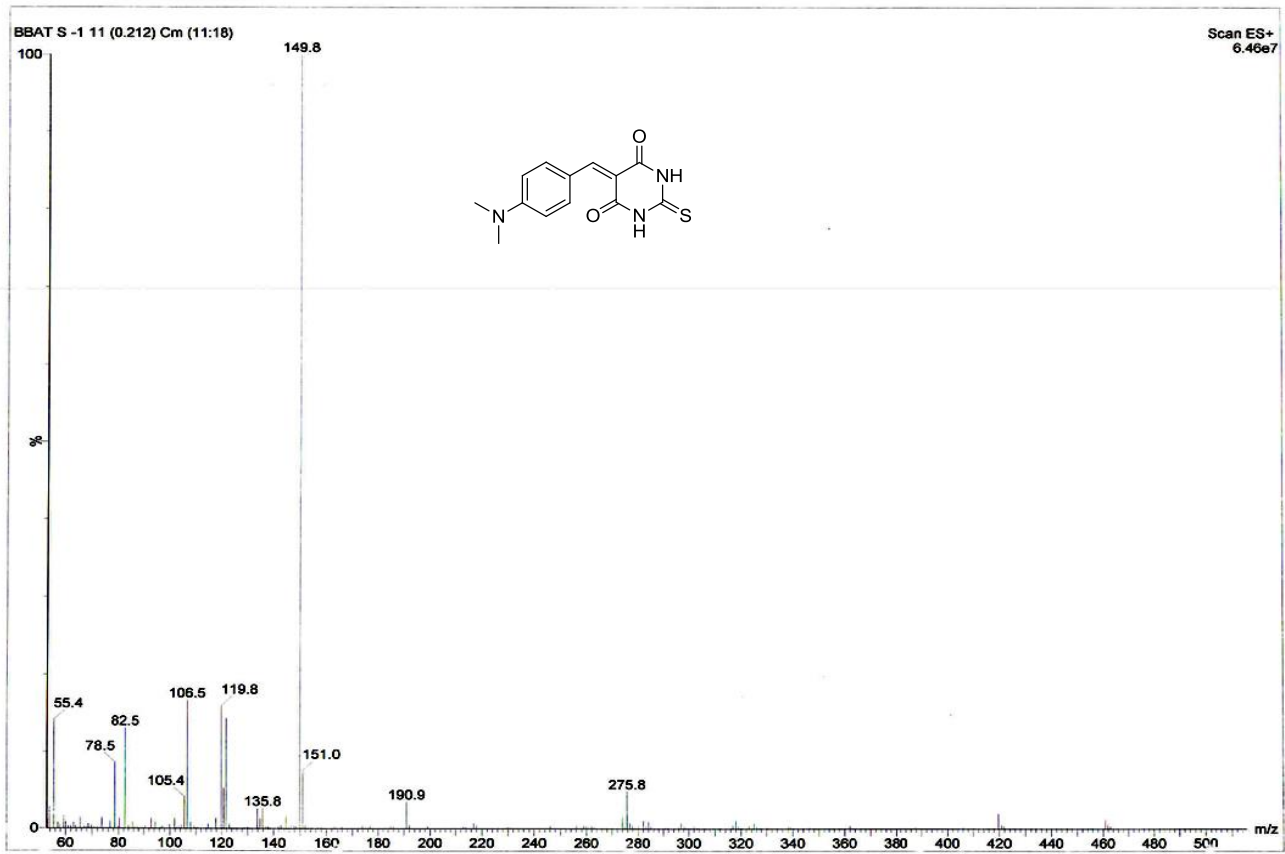

MS spectrum of BBTS-1

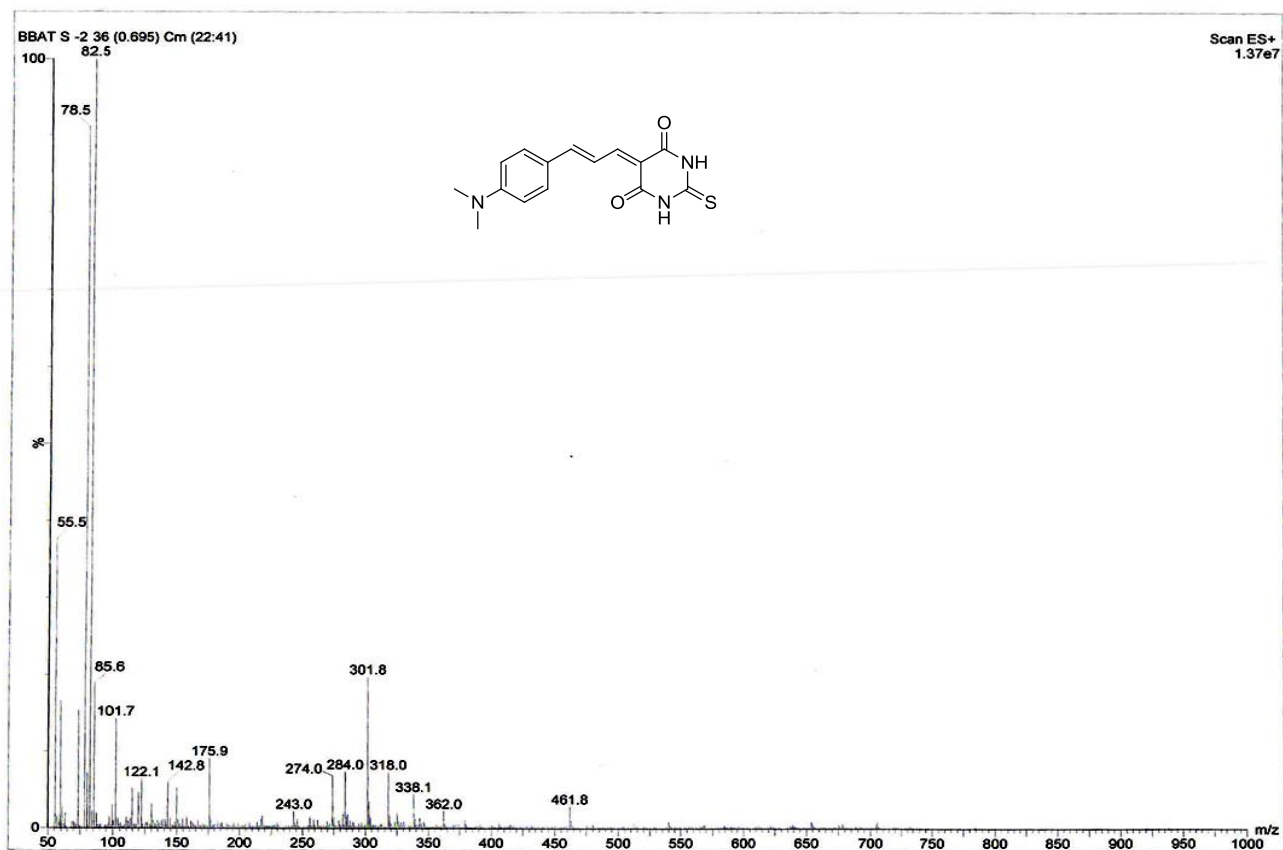

MS spectrum of BBTS-2

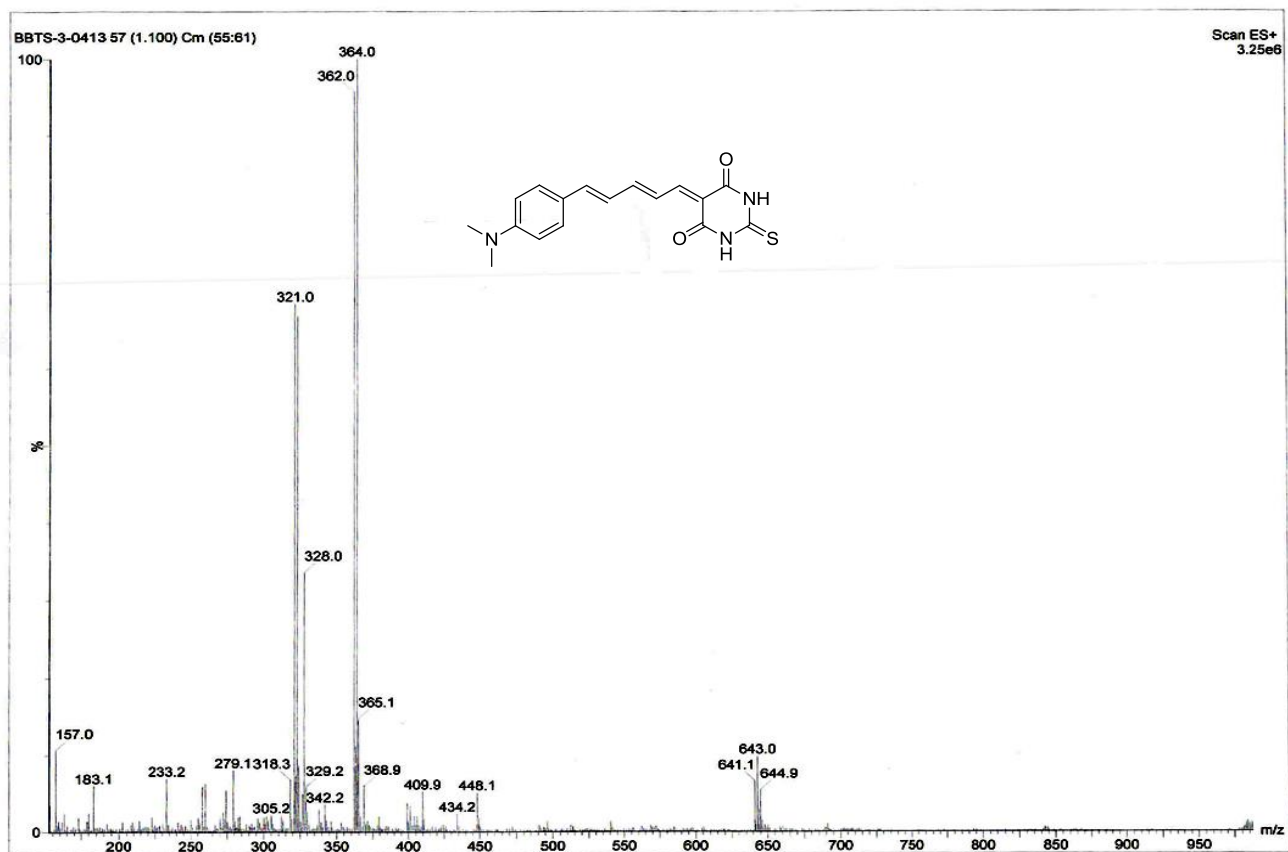

## References.

1. Z. Li, M. Cui, J. Dai, X. Wang, P. Yu, Y. Yang, J. Jia, H. Fu, M. Ono and H. Jia, *Journal of medicinal chemistry*, 2013, **56**, 471-482.
2. J. Olmsted, *Journal of Physical Chemistry*, 1979, **83**, 2581-2584.
3. A. Petrič, S. A. Johnson, H. V. Pham, Y. Li, S. Čeh, A. Golobič, E. D. Agdeppa, G. Timbol, J. Liu and G. Keum, *Proceedings of the National Academy of Sciences*, 2012, **109**, 16492-16497.
4. Z.-P. Zhuang, M.-P. Kung, A. Wilson, C.-W. Lee, K. Plössl, C. Hou, D. M. Holtzman and H. F. Kung, *Journal of medicinal chemistry*, 2003, **46**, 237-243.
5. C. Yung-Chi and W. H. Prusoff, *Biochemical pharmacology*, 1973, **22**, 3099-3108.
6. H. Fu, M. Cui, P. Tu, Z. Pan and B. Liu, *Chem Commun (Camb)*, 2014, **50**, 11875-11878.
